# Supplementary material for: Diazepinium perchlorate: a neutral catalyst for mild, solvent-free acetylation of carbohydrates and other substances
Source: Royal Society of Chemistry journal article supplement (doi:10.1039/c6ra28882k), 2017-01-01
Supplement: c6ra28882k1.pdf [file c6ra28882k1.pdf]

## Electronic Supplementary Information

### Diazepinium perchlorate: A neutral catalyst for mild, solvent-free acyl transfer reactions of carbohydrates and other substances

Santosh Kumar Giri, Rajesh Gour and K. P. Ravindranathan Kartha\*

*Department of Medicinal Chemistry, National Institute of Pharmaceutical Education and Research, S.A.S Nagar, Punjab-160062, India.*

#### Table of Contents

##### 1. <sup>1</sup>H- and <sup>13</sup>C-NMR spectra

|                                                                                            |     |
|--------------------------------------------------------------------------------------------|-----|
| 1.1. <sup>1</sup> H- and <sup>13</sup> C-NMR spectra of compounds <b>1a &amp; 1b</b> ..... | S3  |
| 1.2. <sup>1</sup> H- and <sup>13</sup> C-NMR spectra of compound <b>2</b> .....            | S4  |
| 1.3. DEPT -135 and HSQC-NMR spectra of compound <b>2</b> .....                             | S5  |
| 1.4. <sup>1</sup> H- and <sup>13</sup> C-NMR spectra of compound <b>3</b> .....            | S6  |
| 1.5. <sup>1</sup> H- and <sup>13</sup> C-NMR spectra of compound <b>4</b> .....            | S7  |
| 1.6. <sup>1</sup> H- and <sup>13</sup> C-NMR spectra of compound <b>6</b> .....            | S8  |
| 1.7. <sup>1</sup> H- and <sup>13</sup> C-NMR spectra of compound <b>8</b> .....            | S9  |
| 1.8. <sup>1</sup> H- and <sup>13</sup> C-NMR spectra of compound <b>10</b> .....           | S10 |
| 1.9. <sup>1</sup> H- and <sup>13</sup> C-NMR spectra of compound <b>12</b> .....           | S11 |
| 1.10. <sup>1</sup> H- and <sup>13</sup> C-NMR spectra of compound <b>14</b> .....          | S12 |
| 1.11. <sup>1</sup> H- and <sup>13</sup> C-NMR spectra of compound <b>16</b> .....          | S13 |
| 1.12. <sup>1</sup> H- and <sup>13</sup> C-NMR spectra of compound <b>18</b> .....          | S14 |
| 1.13. <sup>1</sup> H- and <sup>13</sup> C-NMR spectra of compound <b>20</b> .....          | S15 |
| 1.14. <sup>1</sup> H- and <sup>13</sup> C-NMR spectra of compound <b>22</b> .....          | S16 |
| 1.15. <sup>1</sup> H- and <sup>13</sup> C-NMR spectra of compound <b>24</b> .....          | S17 |
| 1.16. <sup>1</sup> H- and <sup>13</sup> C-NMR spectra of compound <b>26</b> .....          | S18 |
| 1.17. <sup>1</sup> H- and <sup>13</sup> C-NMR spectra of compound <b>28</b> .....          | S19 |
| 1.18. <sup>1</sup> H- and <sup>13</sup> C-NMR spectra of compound <b>30</b> .....          | S20 |
| 1.19. <sup>1</sup> H- and <sup>13</sup> C-NMR spectra of compound <b>32</b> .....          | S21 |
| 1.20. <sup>1</sup> H- and <sup>13</sup> C-NMR spectra of compound <b>34</b> .....          | S22 |
| 1.21. <sup>1</sup> H- and <sup>13</sup> C-NMR spectra of compound <b>36</b> .....          | S23 |
| 1.22. <sup>1</sup> H- and <sup>13</sup> C-NMR spectra of compound <b>38</b> .....          | S24 |
| 1.23. <sup>1</sup> H- and <sup>13</sup> C-NMR spectra of compound <b>40</b> .....          | S25 |
| 1.24. <sup>1</sup> H- and <sup>13</sup> C-NMR spectra of compound <b>42</b> .....          | S26 |
| 1.25. <sup>1</sup> H- and <sup>13</sup> C-NMR spectra of compound <b>44</b> .....          | S27 |
| 1.26. <sup>1</sup> H- and <sup>13</sup> C-NMR spectra of compound <b>48</b> .....          | S28 |

|       |                                                                                              |     |
|-------|----------------------------------------------------------------------------------------------|-----|
| 1.27. | $^1\text{H}$ - and $^{13}\text{C}$ -NMR spectra of compound <b>50</b> .....                  | S29 |
| 1.28. | $^1\text{H}$ - and $^{13}\text{C}$ -NMR spectra of compound <b>52</b> .....                  | S30 |
| 1.29. | $^1\text{H}$ - and $^{13}\text{C}$ -NMR spectra of compound <b>54</b> .....                  | S31 |
| 1.30. | $^1\text{H}$ - and $^{13}\text{C}$ -NMR spectra of compound <b>56</b> .....                  | S32 |
| 1.31. | $^1\text{H}$ - and $^{13}\text{C}$ -NMR spectra of compound <b>58</b> .....                  | S33 |
| 1.32. | $^1\text{H}$ - and $^{13}\text{C}$ -NMR spectra of compound <b>60</b> .....                  | S34 |
| 1.33. | $^1\text{H}$ - and $^{13}\text{C}$ -NMR spectra of compound <b>62</b> .....                  | S35 |
| 1.34. | $^1\text{H}$ - and $^{13}\text{C}$ -NMR spectra of compound <b>64</b> .....                  | S36 |
| 1.35. | $^1\text{H}$ - and $^{13}\text{C}$ -NMR spectra of compound <b>68</b> .....                  | S37 |
| 1.36. | $^1\text{H}$ - and $^{13}\text{C}$ -NMR spectra of compound <b>70</b> .....                  | S38 |
| 1.37. | $^1\text{H}$ - and $^{13}\text{C}$ -NMR spectra of compound <b>72</b> .....                  | S39 |
| 1.38. | $^1\text{H}$ - and $^{13}\text{C}$ -NMR spectra of compound <b>74</b> .....                  | S40 |
| 1.39. | $^1\text{H}$ - and $^{13}\text{C}$ -NMR spectra of compound <b>76</b> .....                  | S41 |
| 1.40. | $^1\text{H}$ - and $^{13}\text{C}$ -NMR spectra of compound <b>80</b> .....                  | S42 |
| 1.41. | $^1\text{H}$ - and $^{13}\text{C}$ -NMR spectra of compound <b>82</b> .....                  | S43 |
| 1.42. | $^1\text{H}$ - and $^{13}\text{C}$ -NMR spectra of compound <b>84</b> .....                  | S44 |
| 1.43. | $^1\text{H}$ - and $^{13}\text{C}$ -NMR spectra of compound <b>85</b> .....                  | S45 |
| 1.44. | $^1\text{H}$ - and $^{13}\text{C}$ -NMR spectra of compound <b>87</b> .....                  | S46 |
| 1.45. | $^1\text{H}$ - and $^{13}\text{C}$ -NMR spectra of compound <b>88</b> .....                  | S47 |
| 1.46. | $^1\text{H}$ - and $^{13}\text{C}$ -NMR spectra of compounds <b>90</b> and <b>91</b> .....   | S48 |
| 1.47. | $^1\text{H}$ - and $^{13}\text{C}$ -NMR spectra of compounds <b>92</b> and <b>93</b> .....   | S49 |
| 1.48. | $^1\text{H}$ - and $^{13}\text{C}$ -NMR spectra of compound <b>95</b> .....                  | S50 |
| 1.49. | $^1\text{H}$ - and $^{13}\text{C}$ -NMR spectra of compound <b>96</b> .....                  | S51 |
| 1.50. | $^1\text{H}$ - and $^{13}\text{C}$ -NMR spectra of compound <b>98</b> .....                  | S52 |
| 1.51. | $^1\text{H}$ - and $^{13}\text{C}$ -NMR spectra of compound <b>99</b> .....                  | S53 |
| 1.52. | $^1\text{H}$ - and $^{13}\text{C}$ -NMR spectra of compound <b>101</b> .....                 | S54 |
| 1.53. | $^1\text{H}$ - and $^{13}\text{C}$ -NMR spectra of compound <b>102</b> .....                 | S55 |
| 1.54. | $^1\text{H}$ - and $^{13}\text{C}$ -NMR spectra of compounds <b>104</b> and <b>105</b> ..... | S56 |

## 2. Computational Details

2.1 Cartesian coordinates of compounds  $\text{Ac}_2\text{O}$ ,  $\text{MeSO}_3\text{H}$ , **2**, **2b**, **2d** optimized at B3LYP/6-31+G(d) in gas phase.....S57-S59

2.2 Cartesian coordinates of compounds **39-78** optimized at B3LYP/6-31+G(d) in gas phase.....S60-S66

# 1. <sup>1</sup>H- and <sup>13</sup>C-NMR spectra

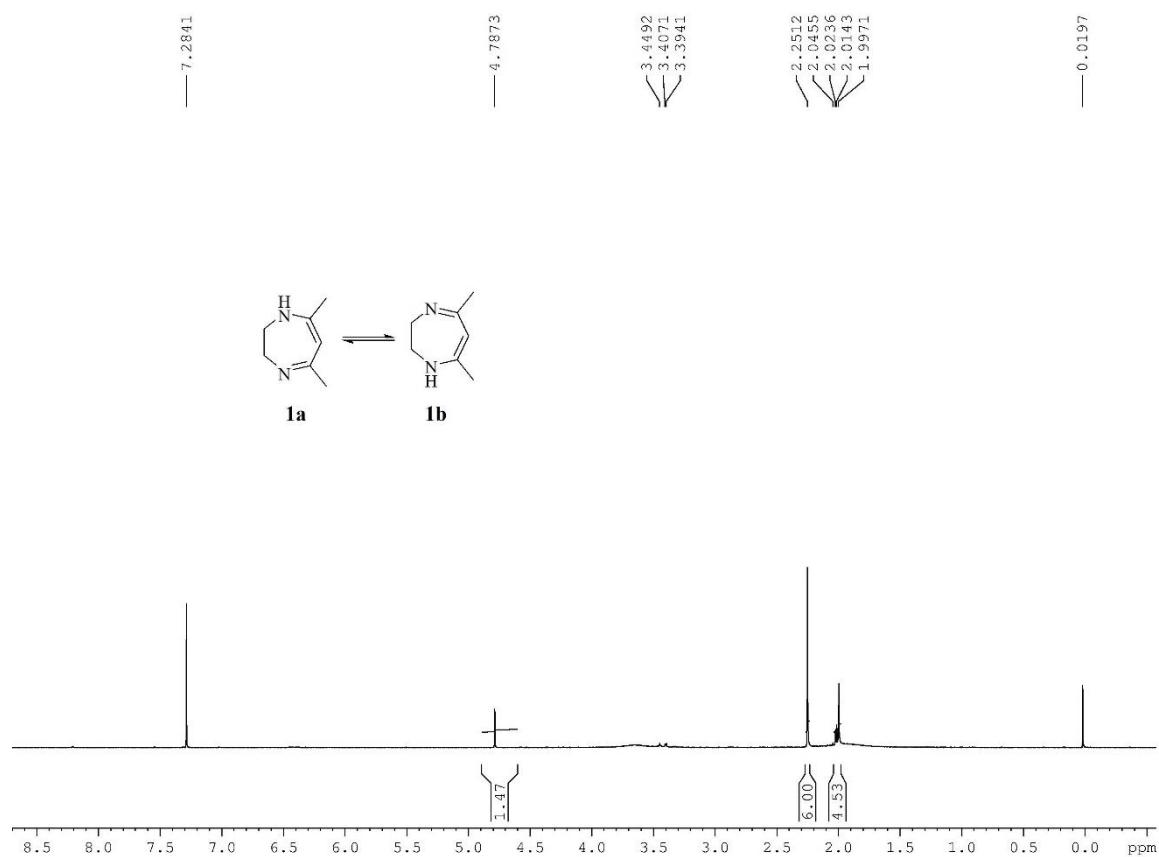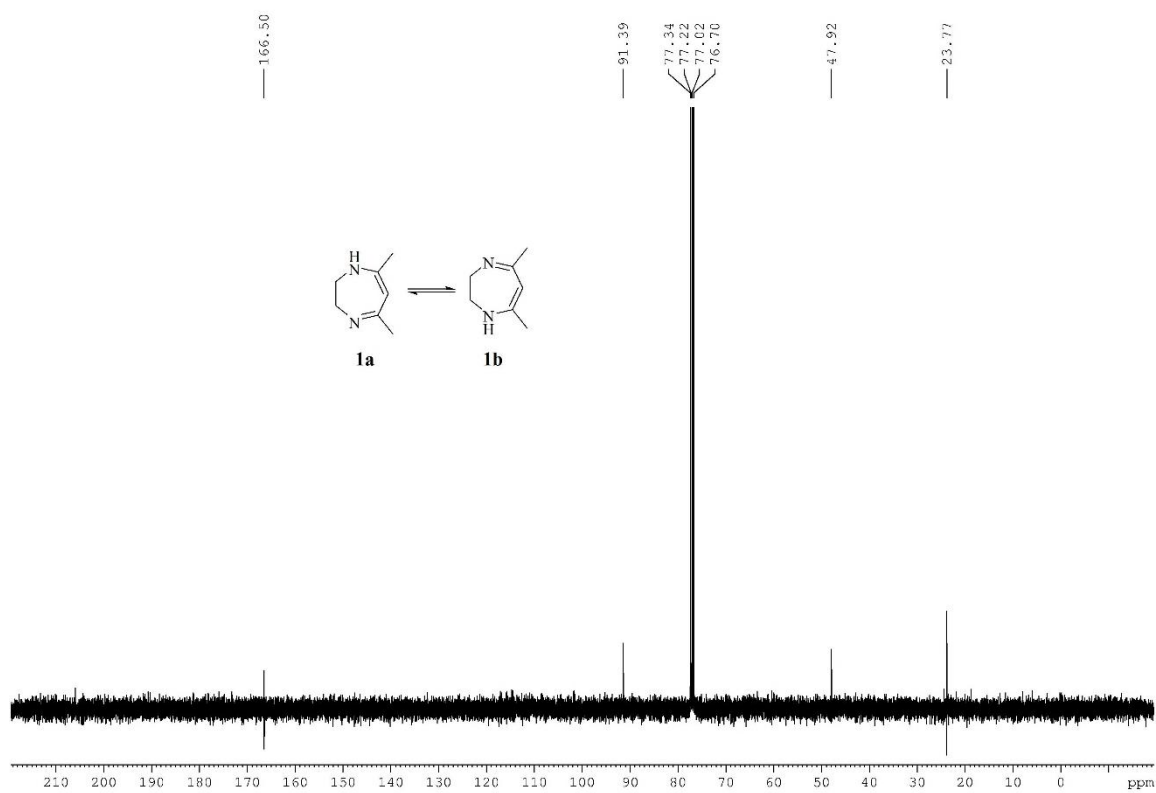

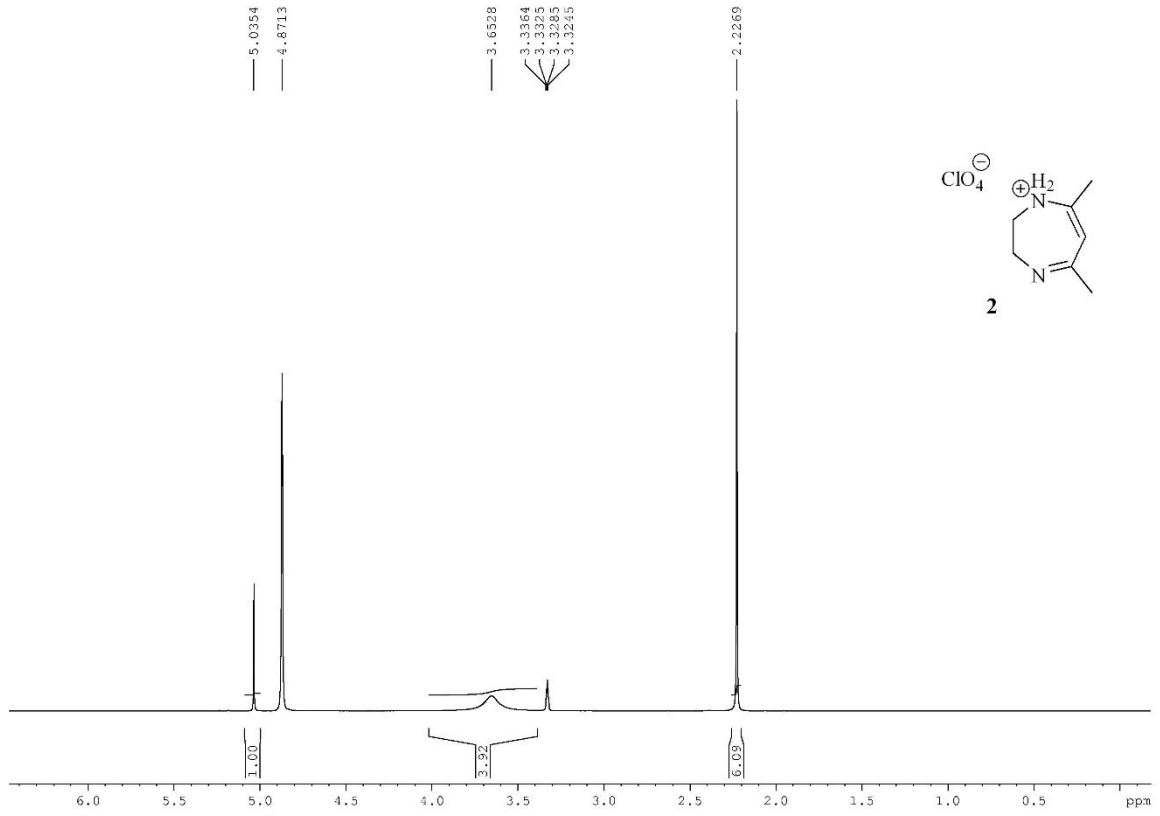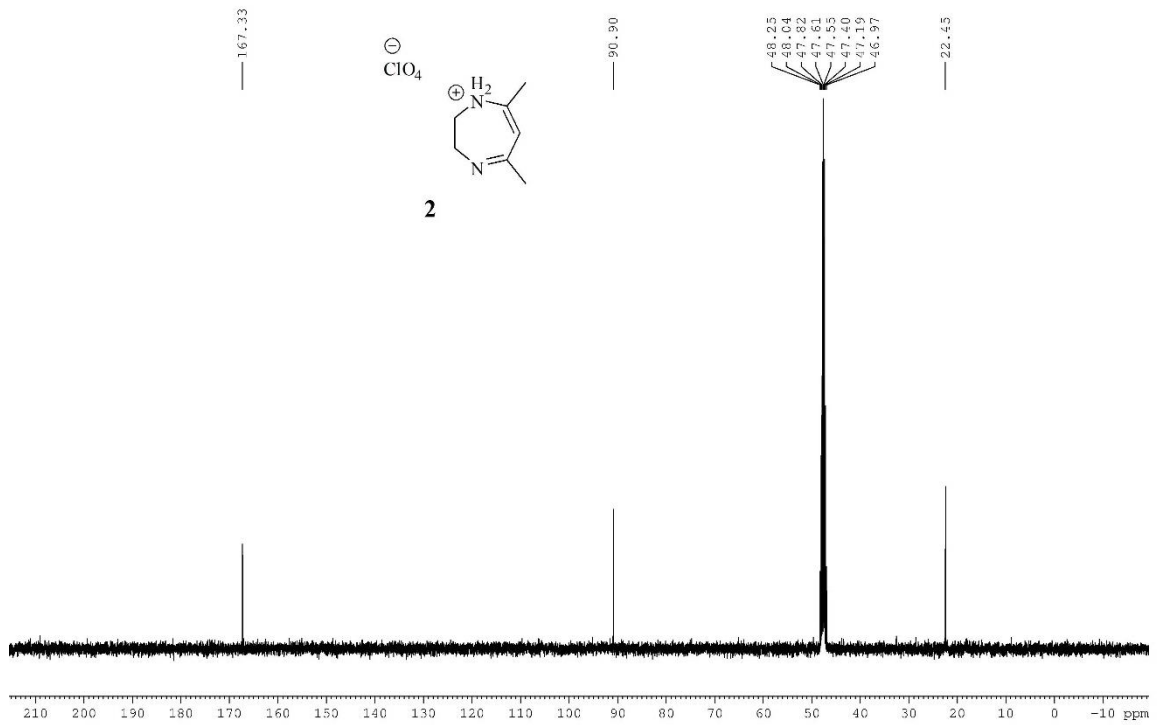

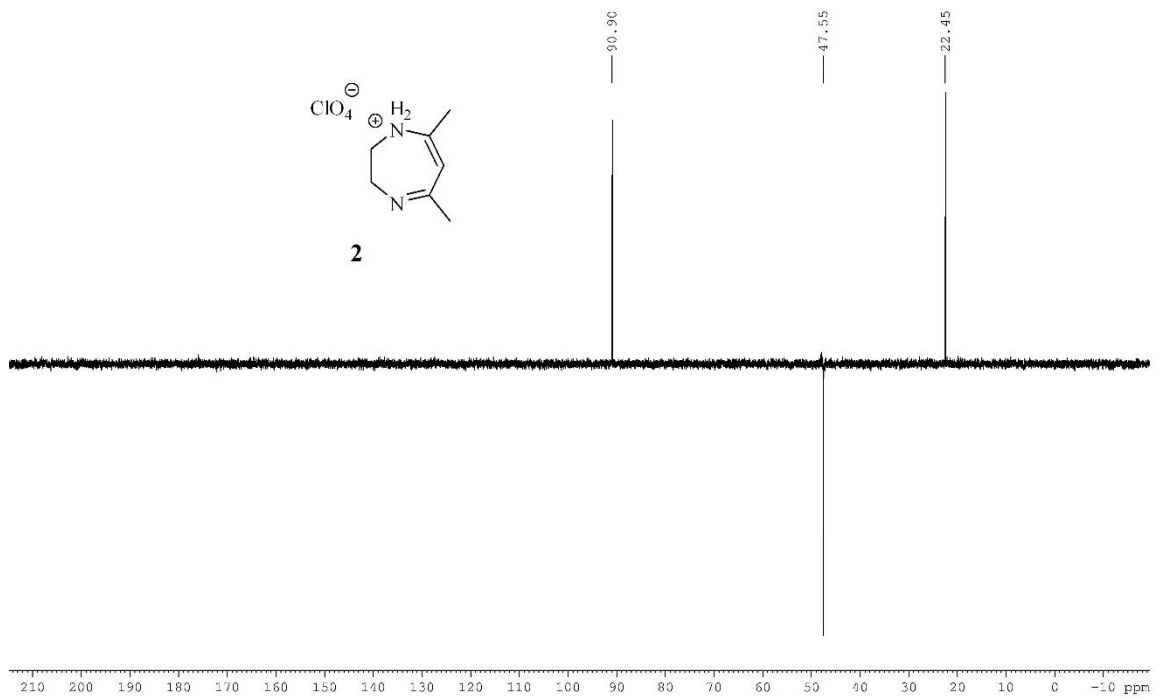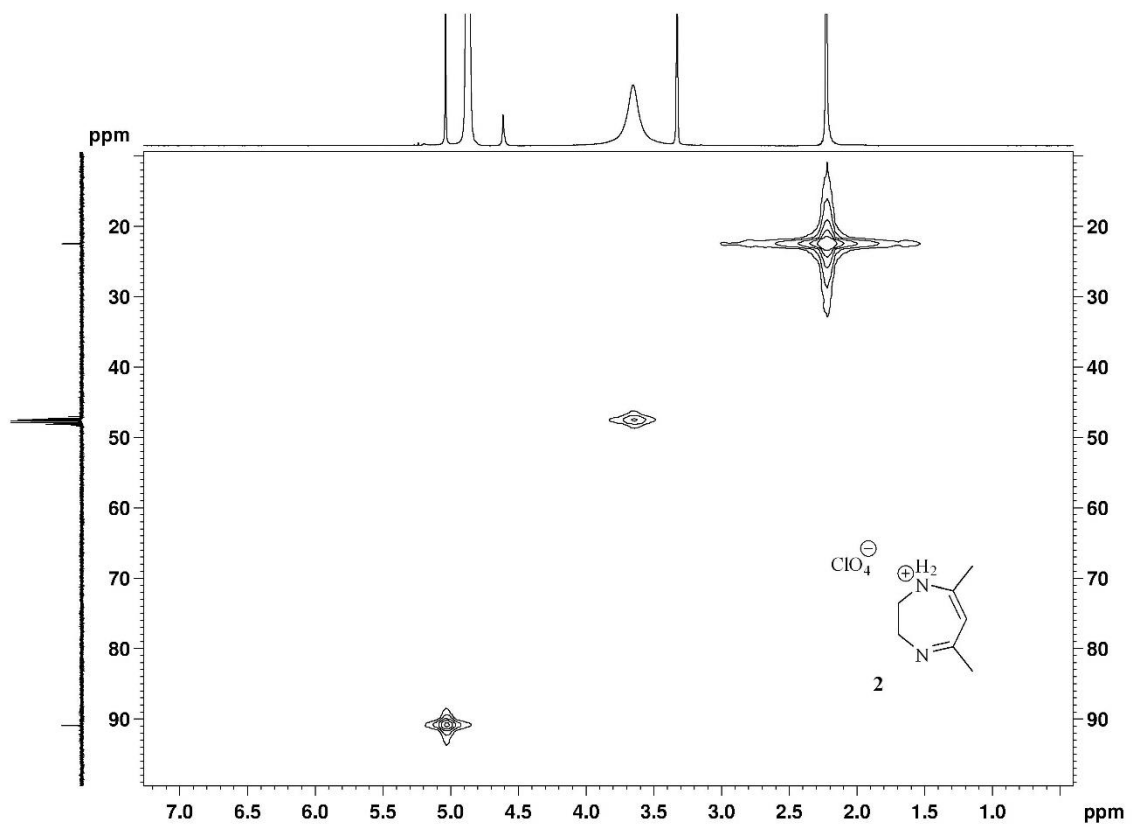

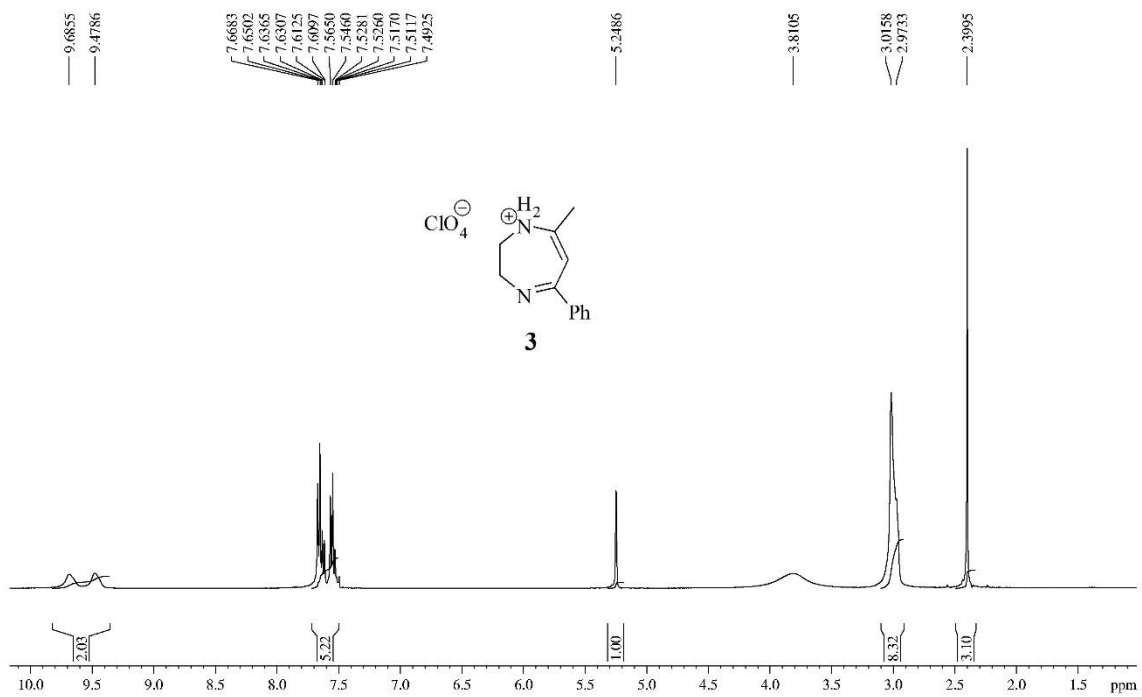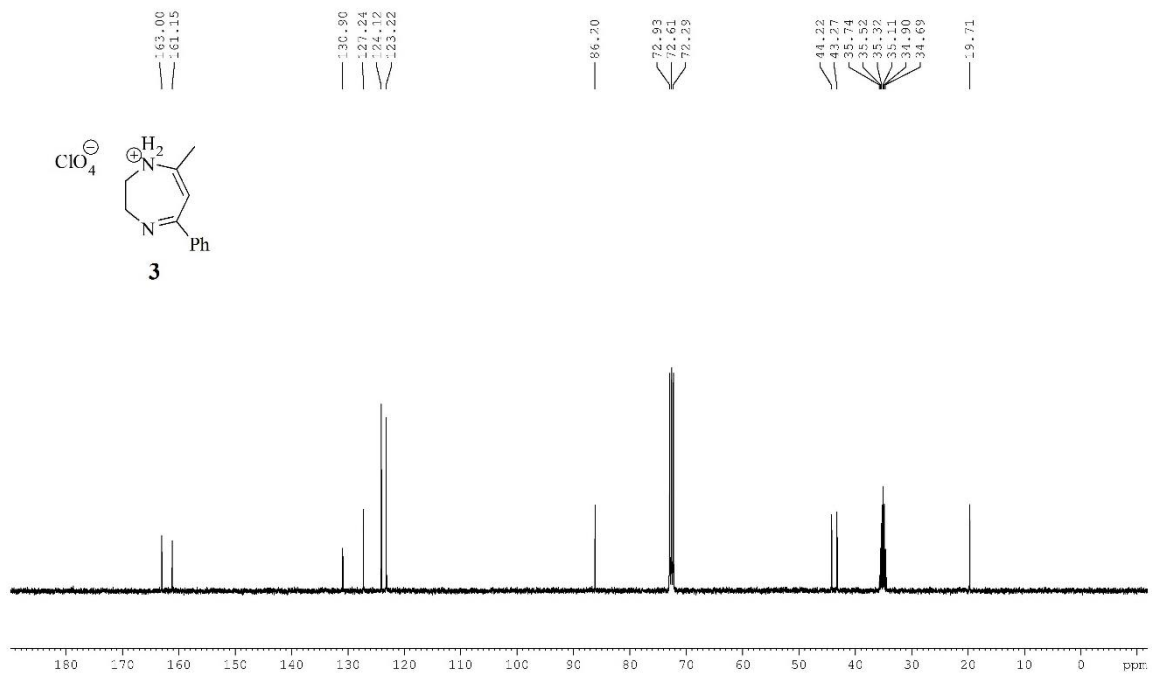

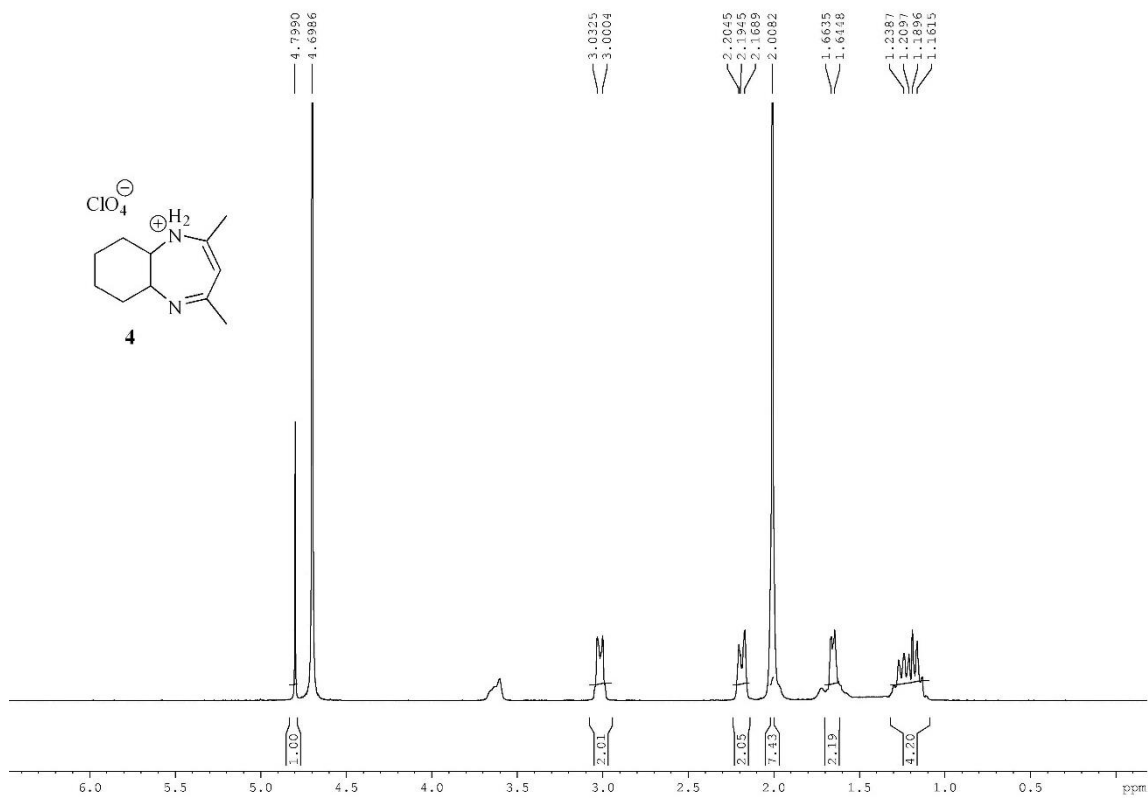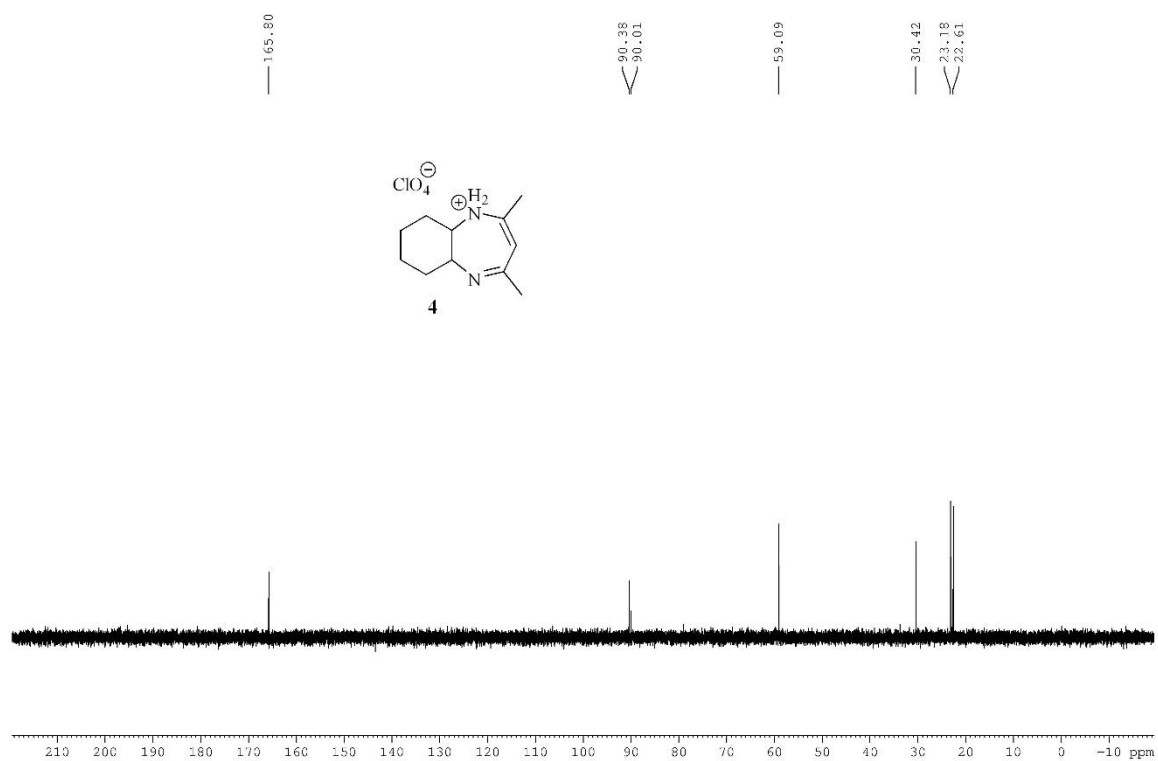

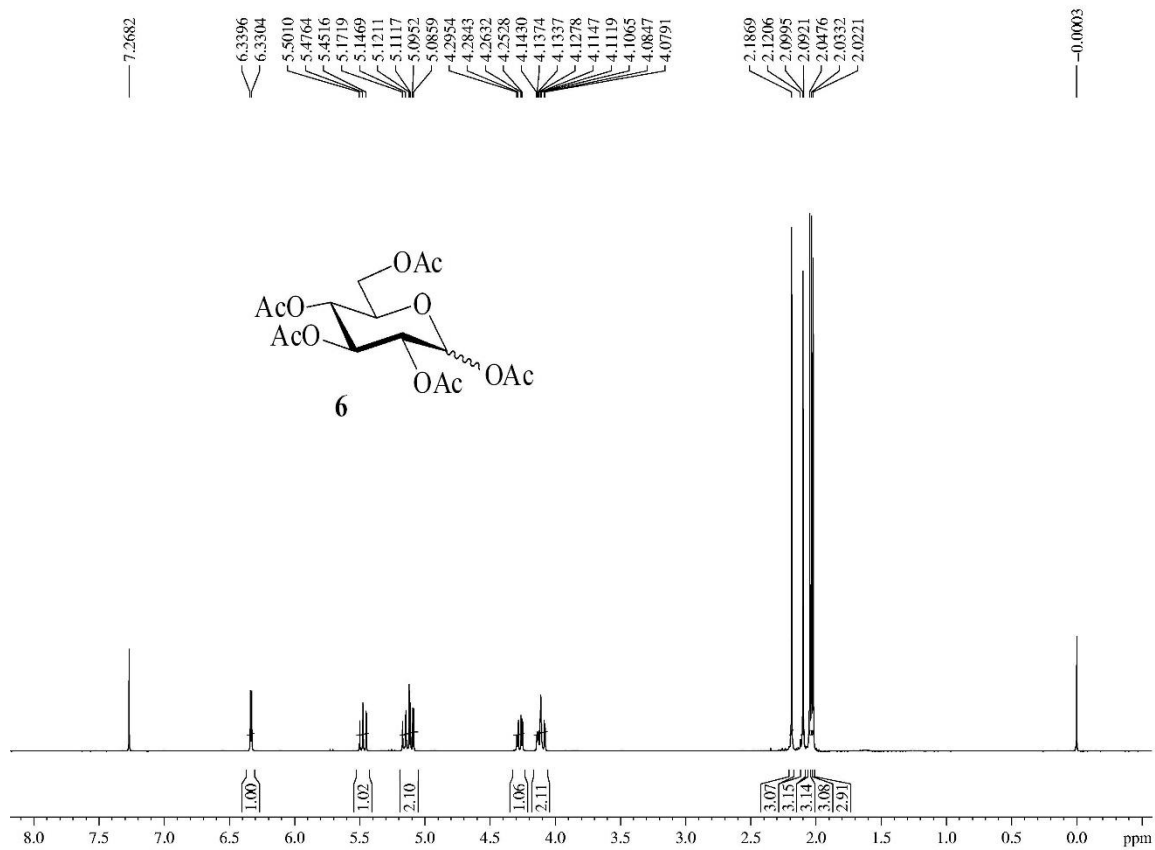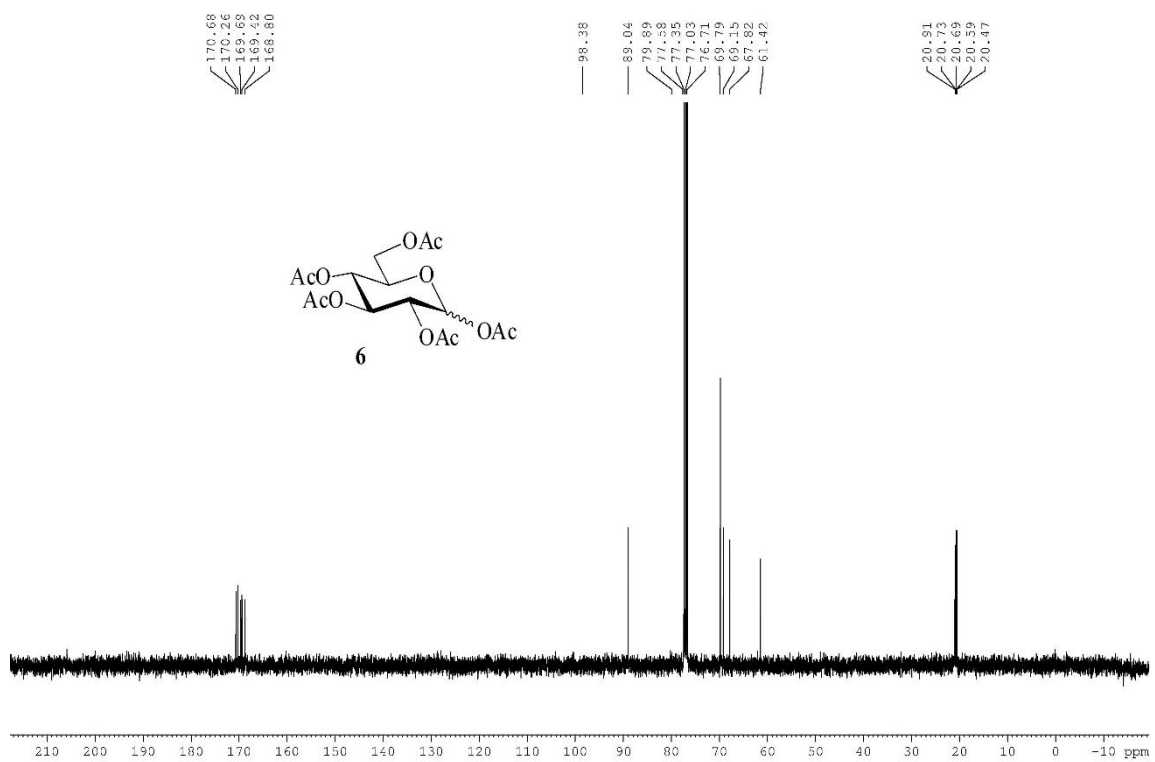



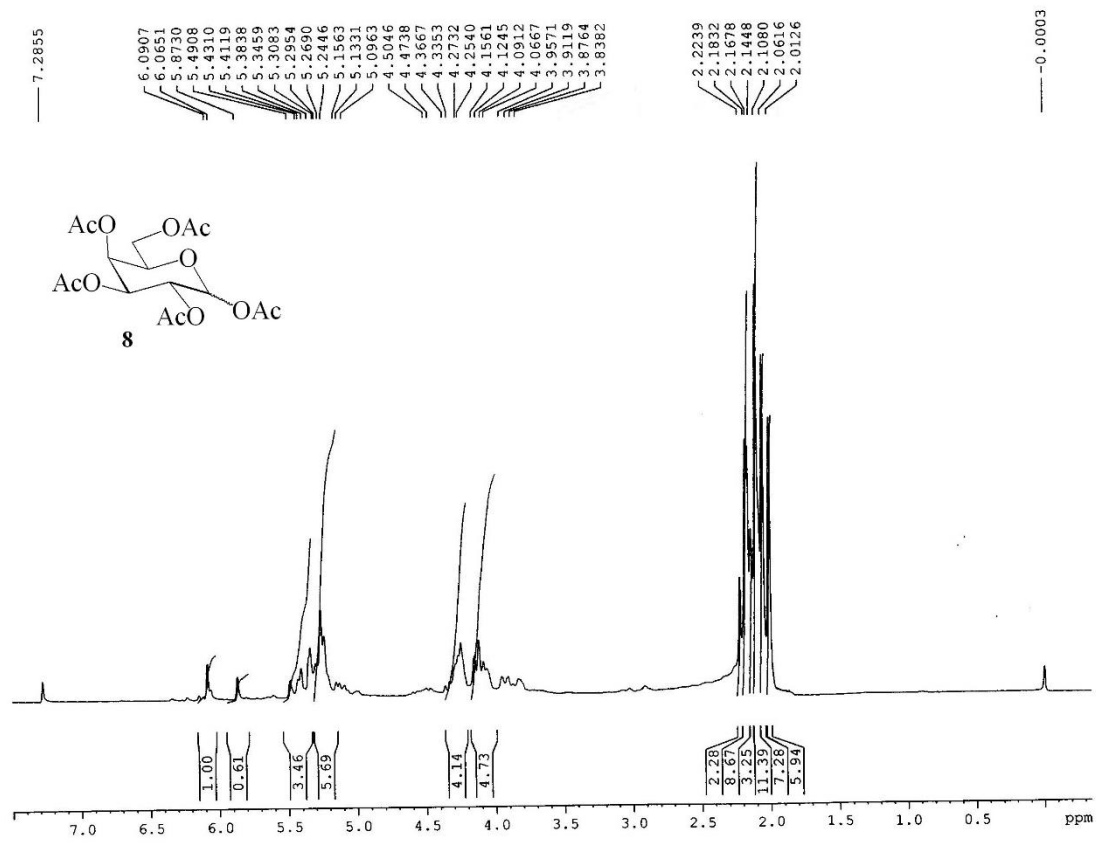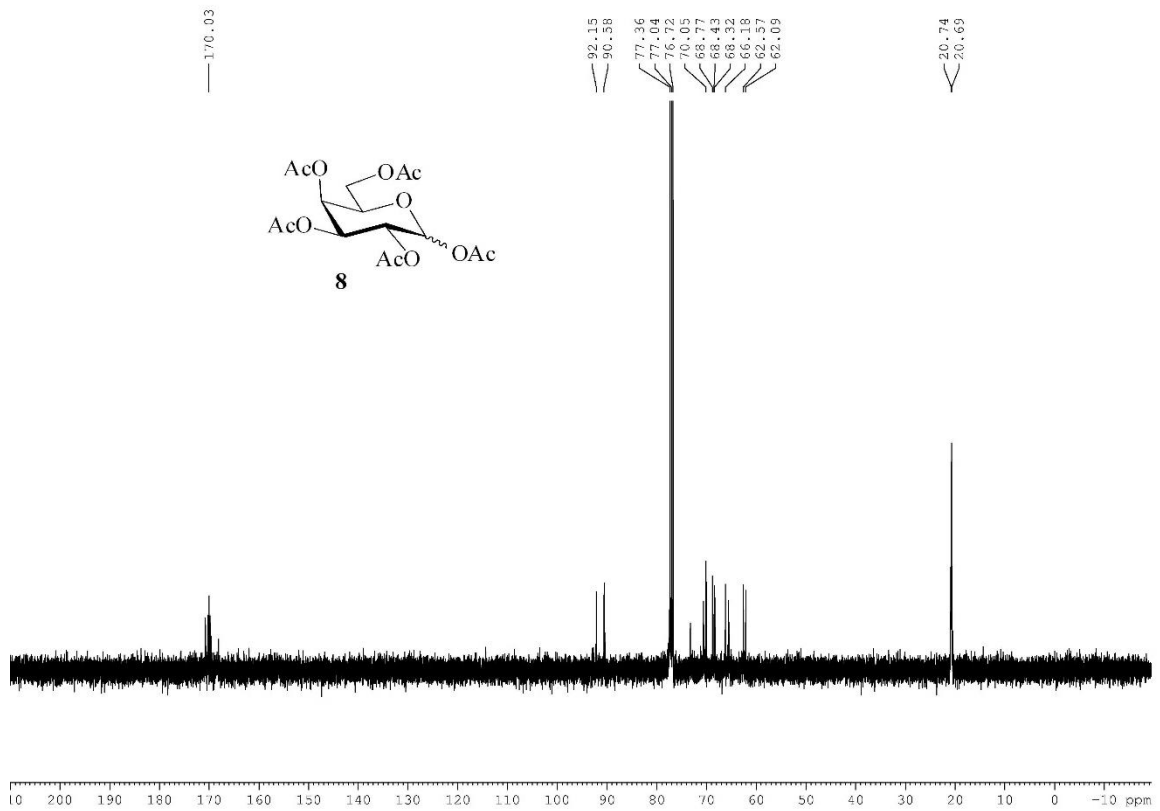

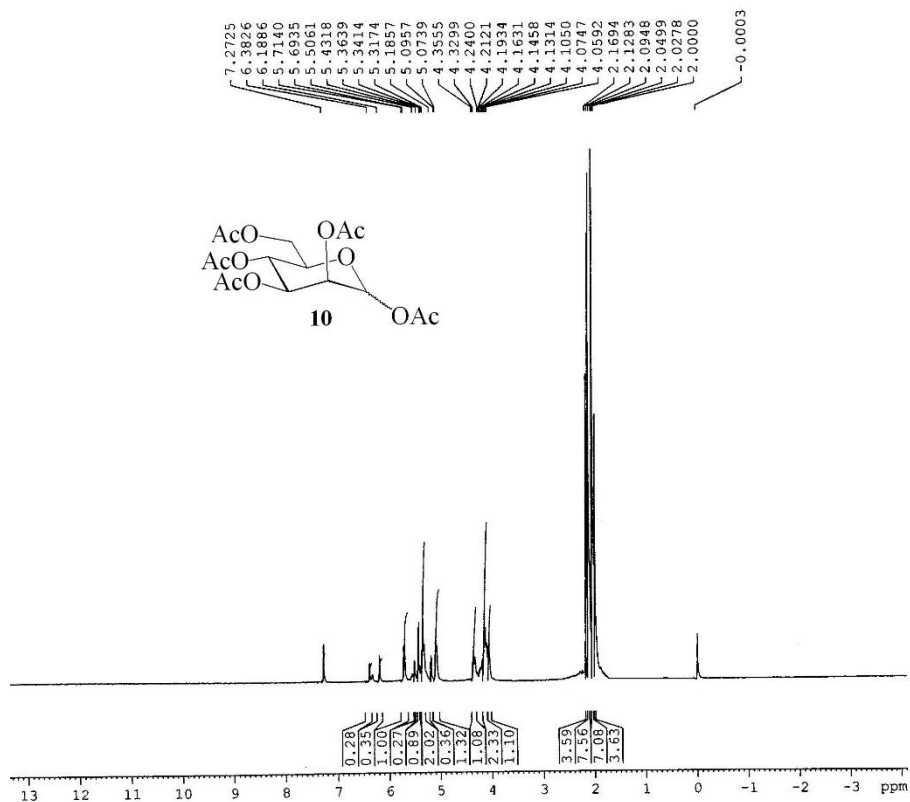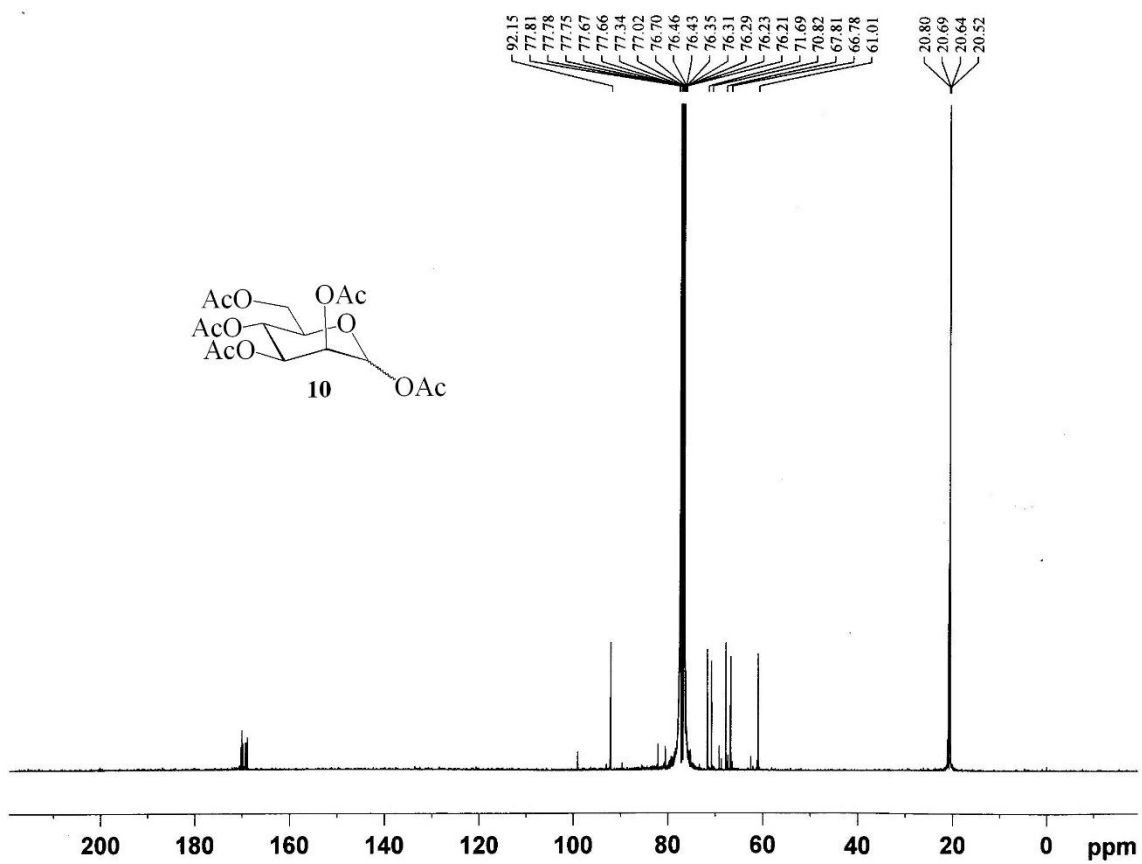

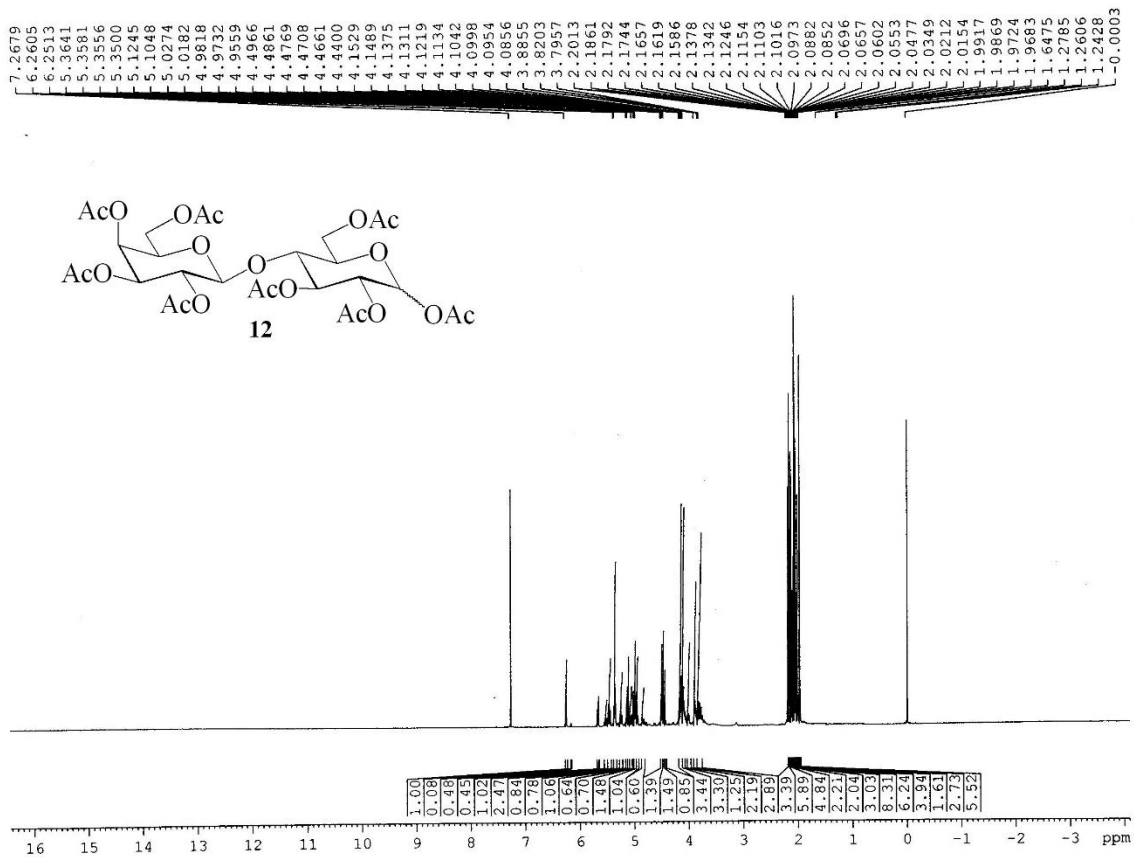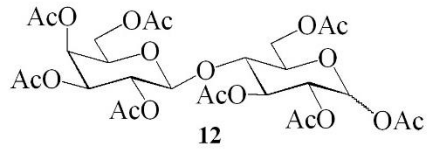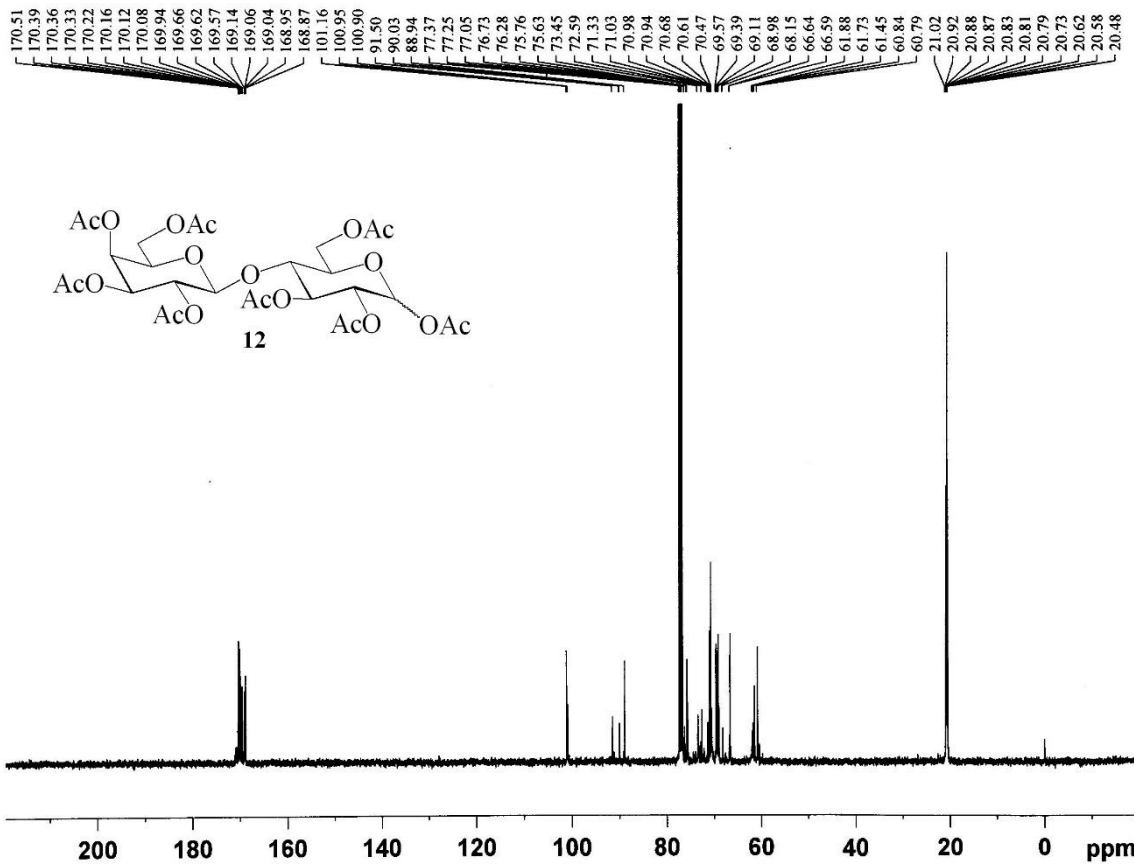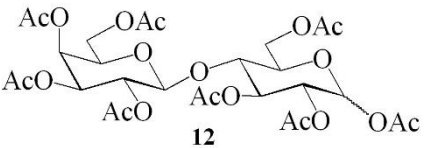

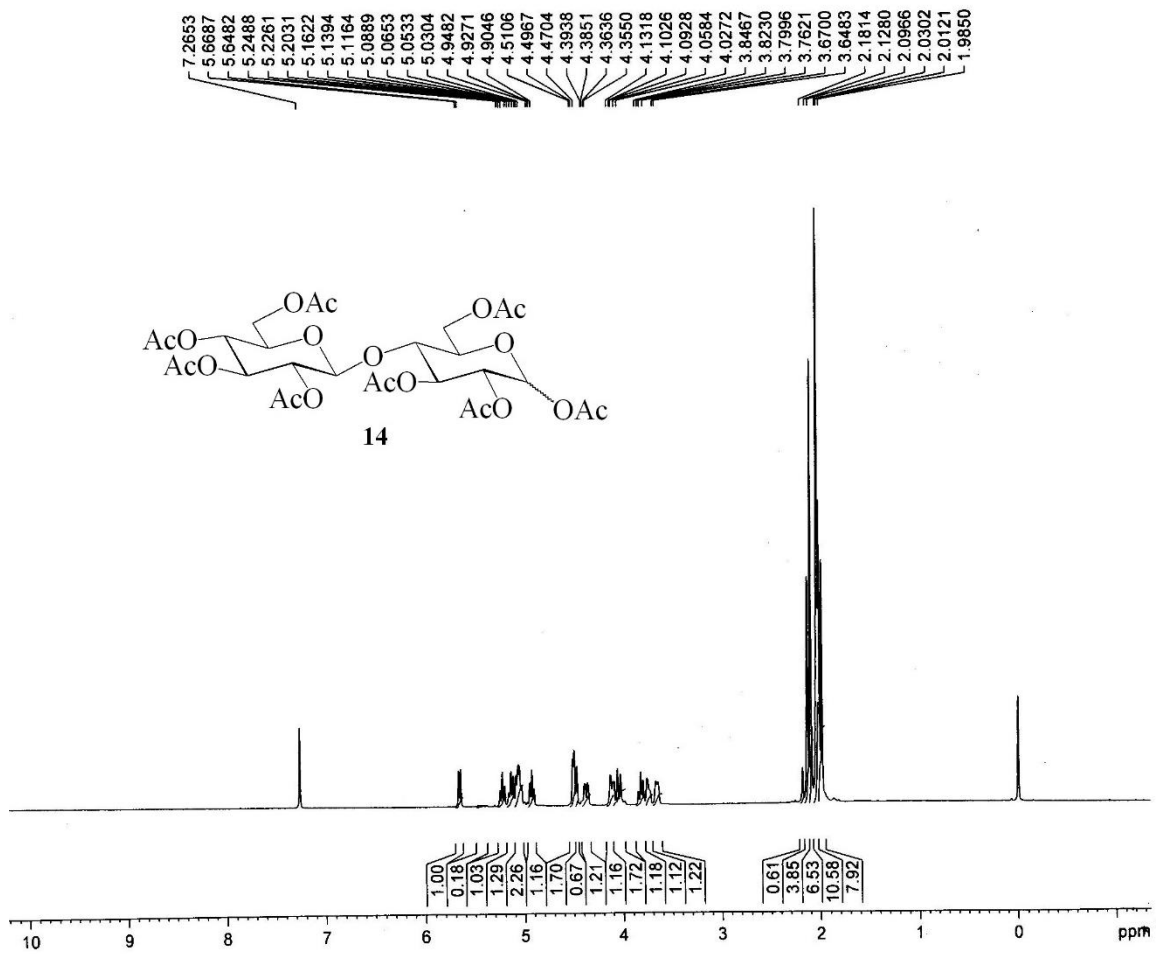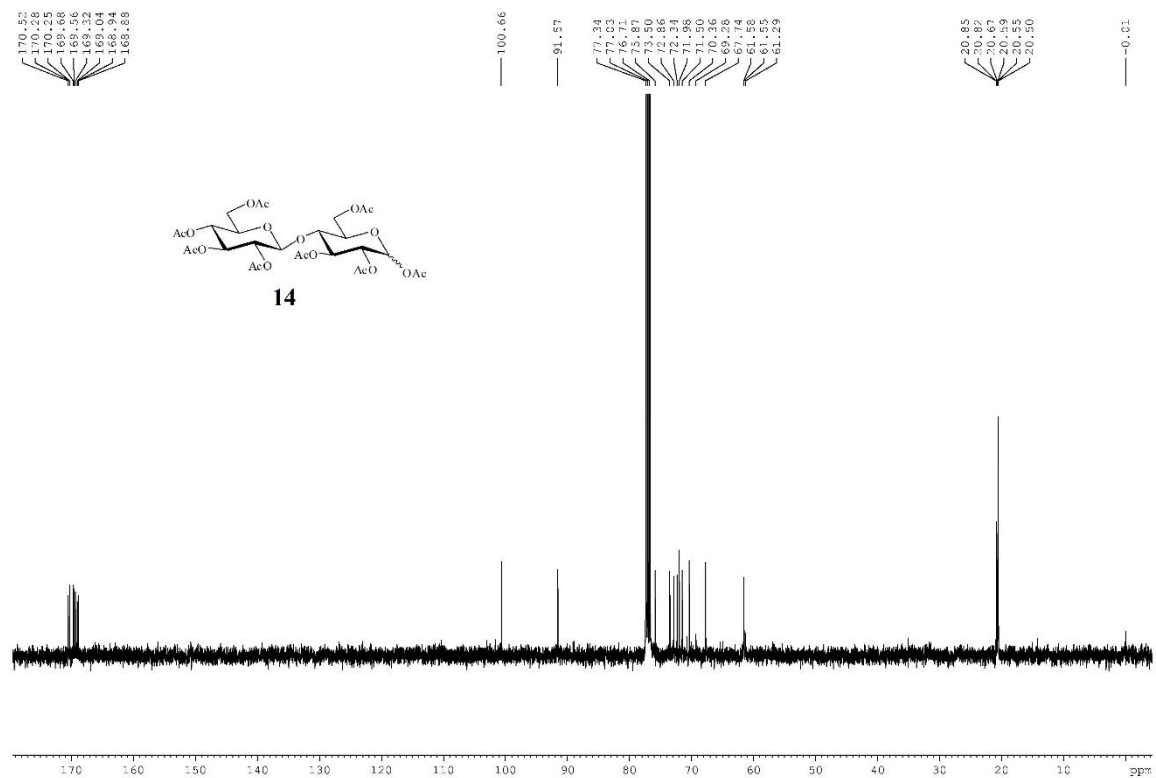

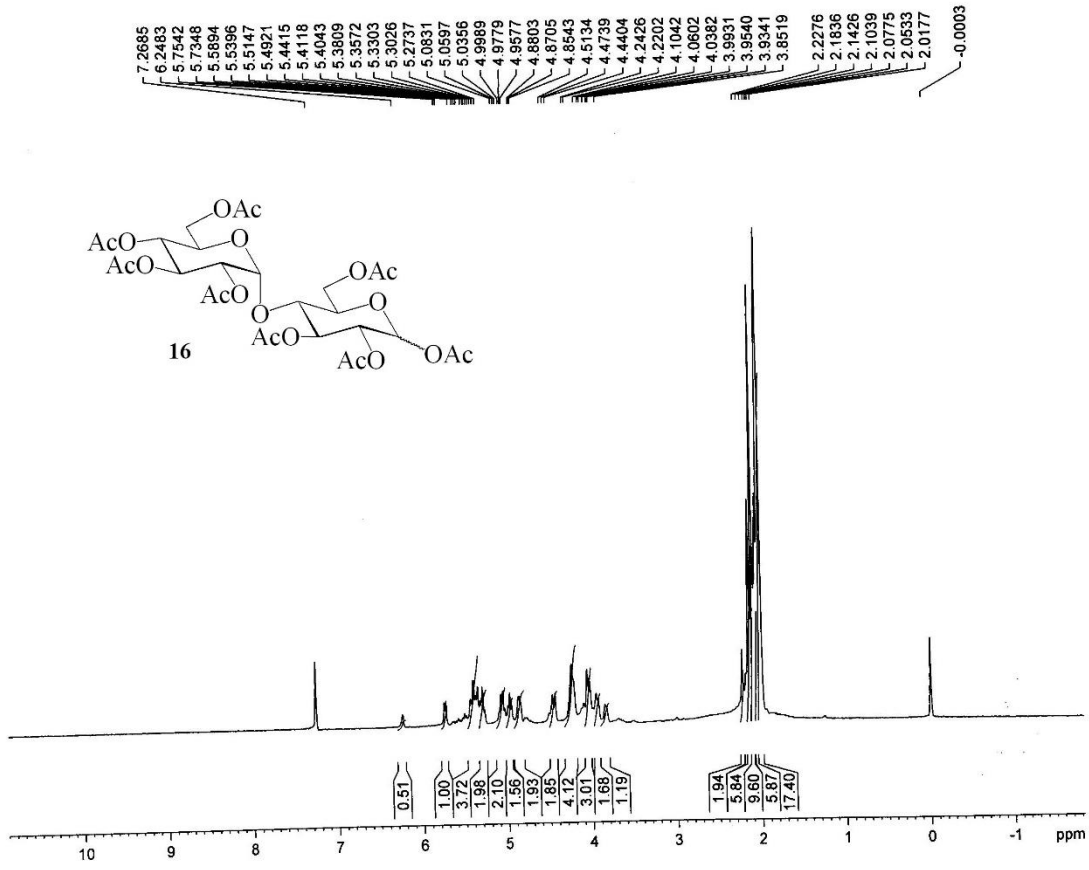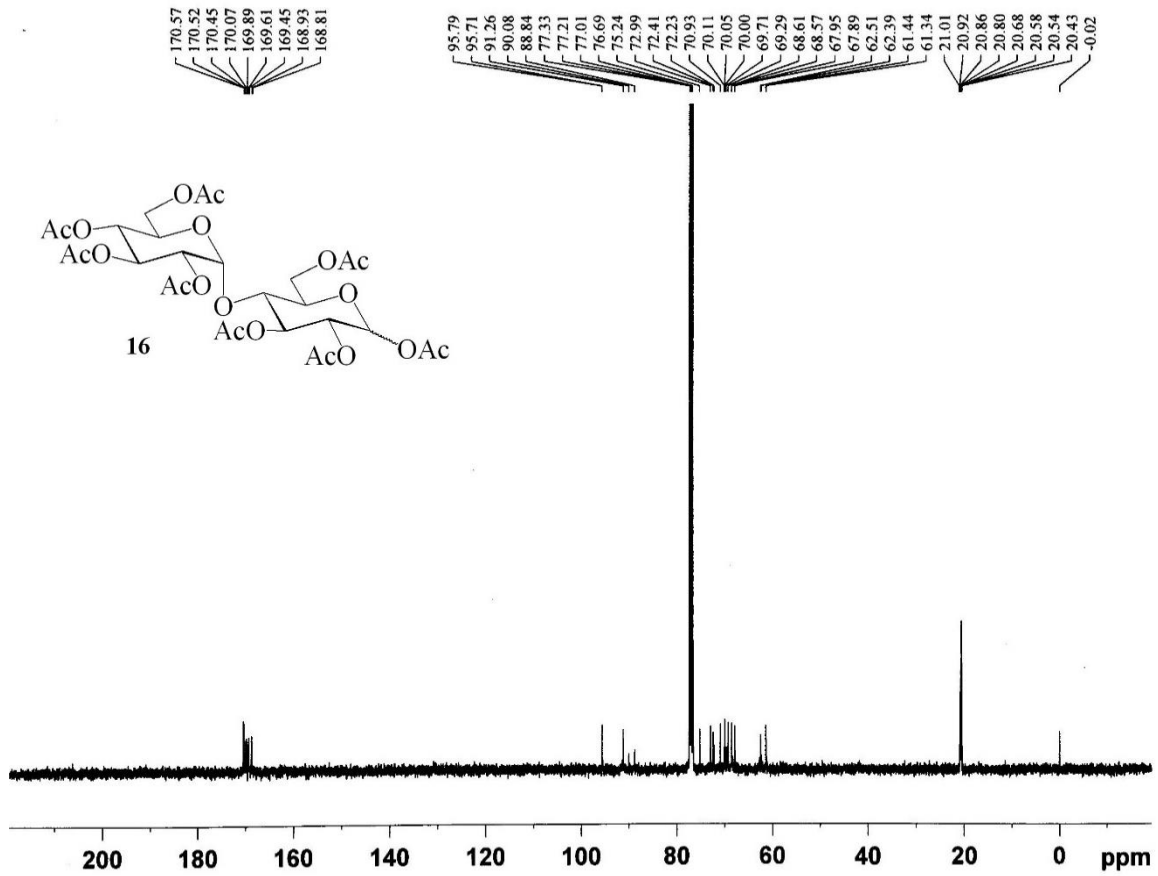

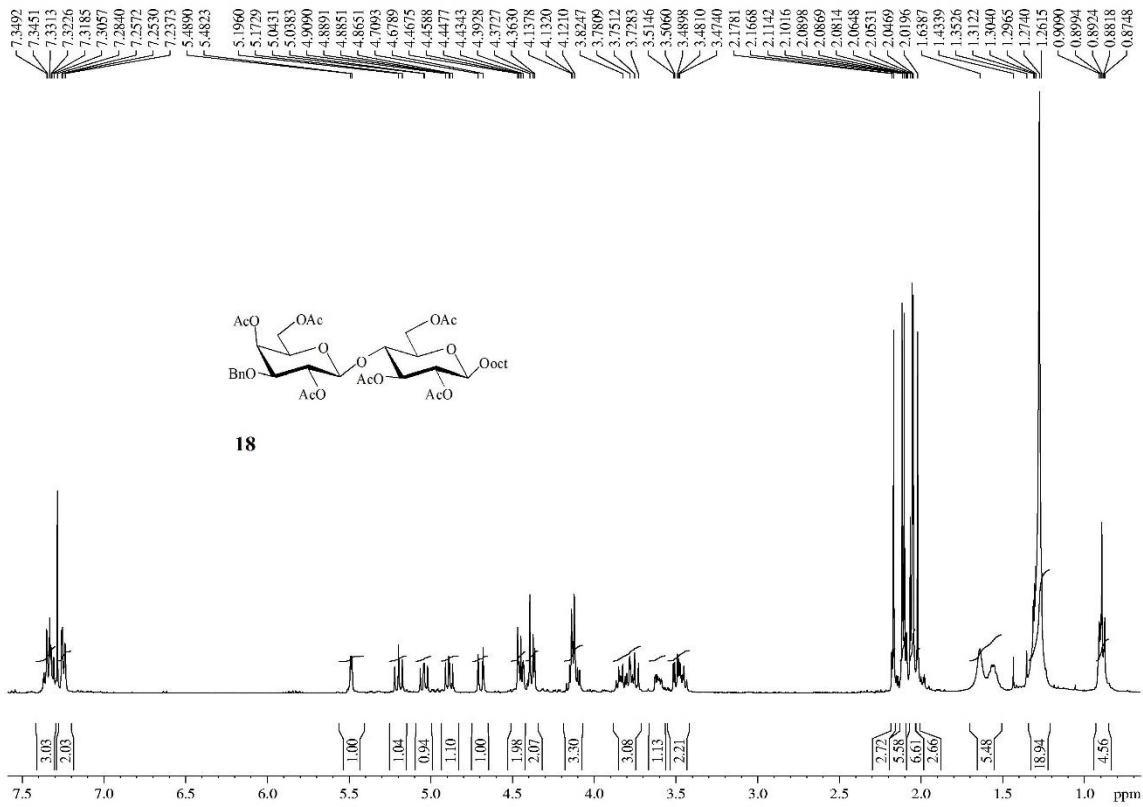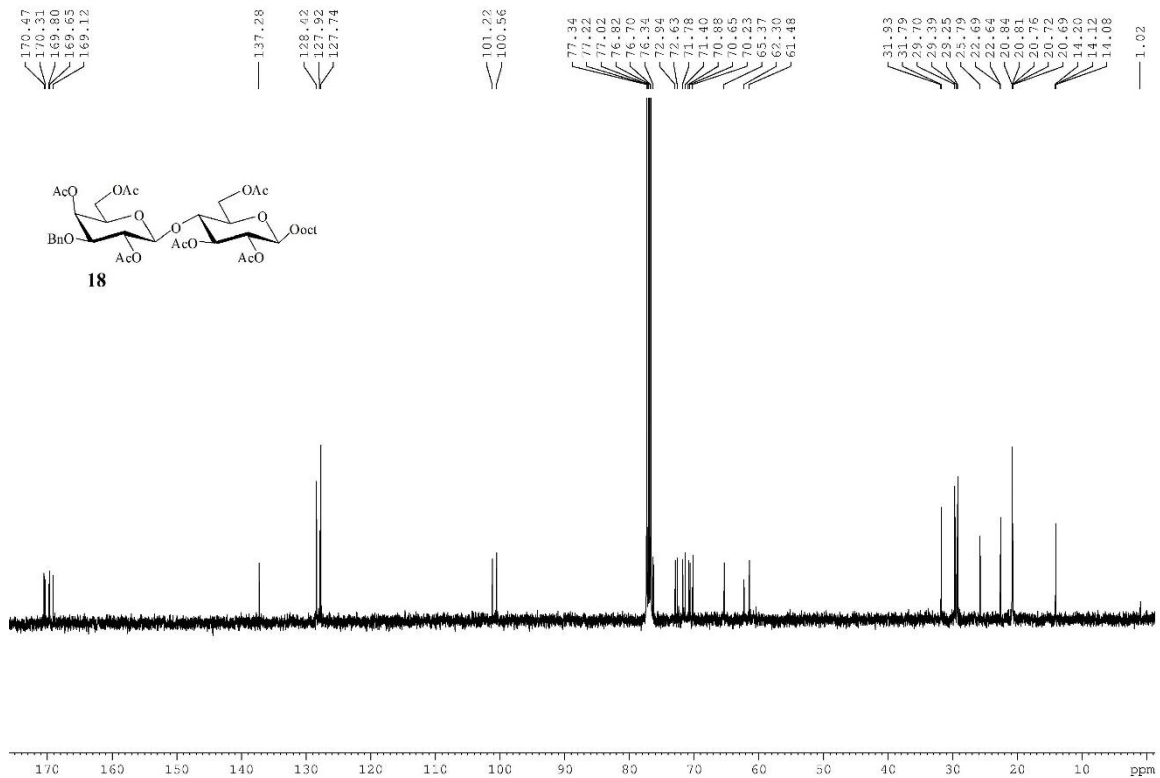

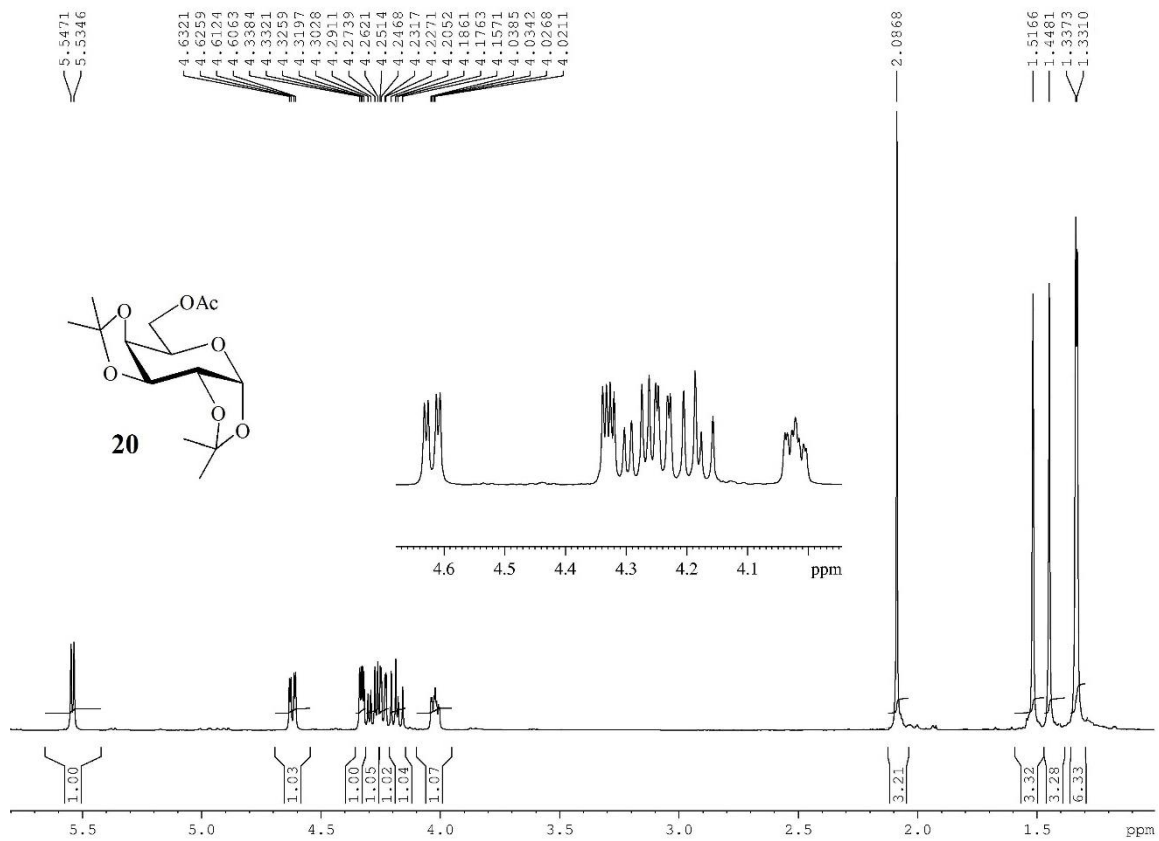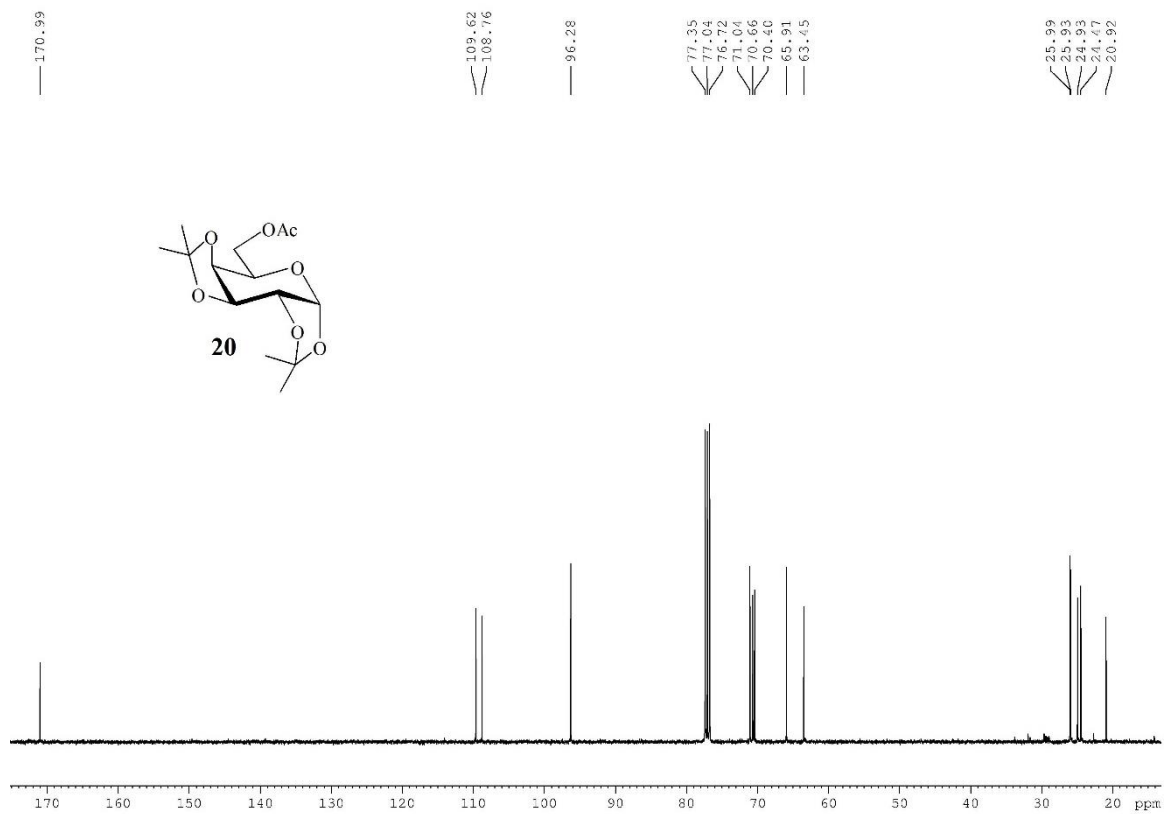

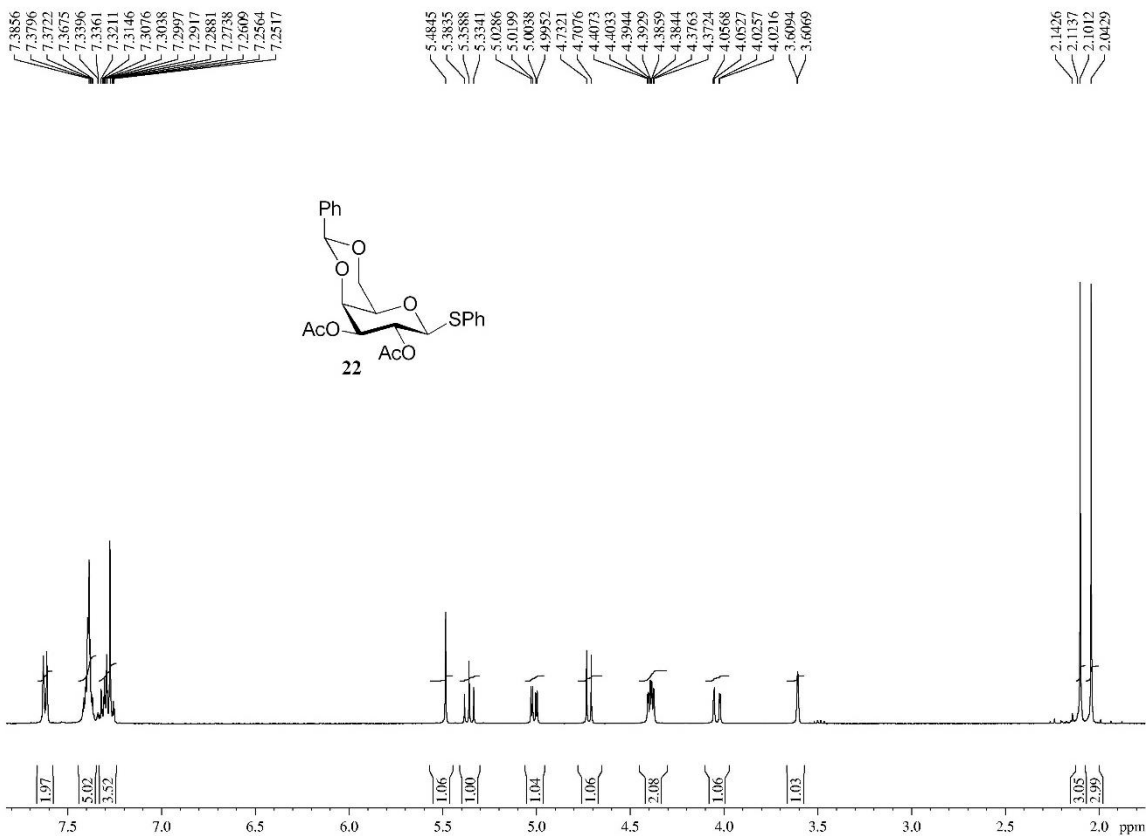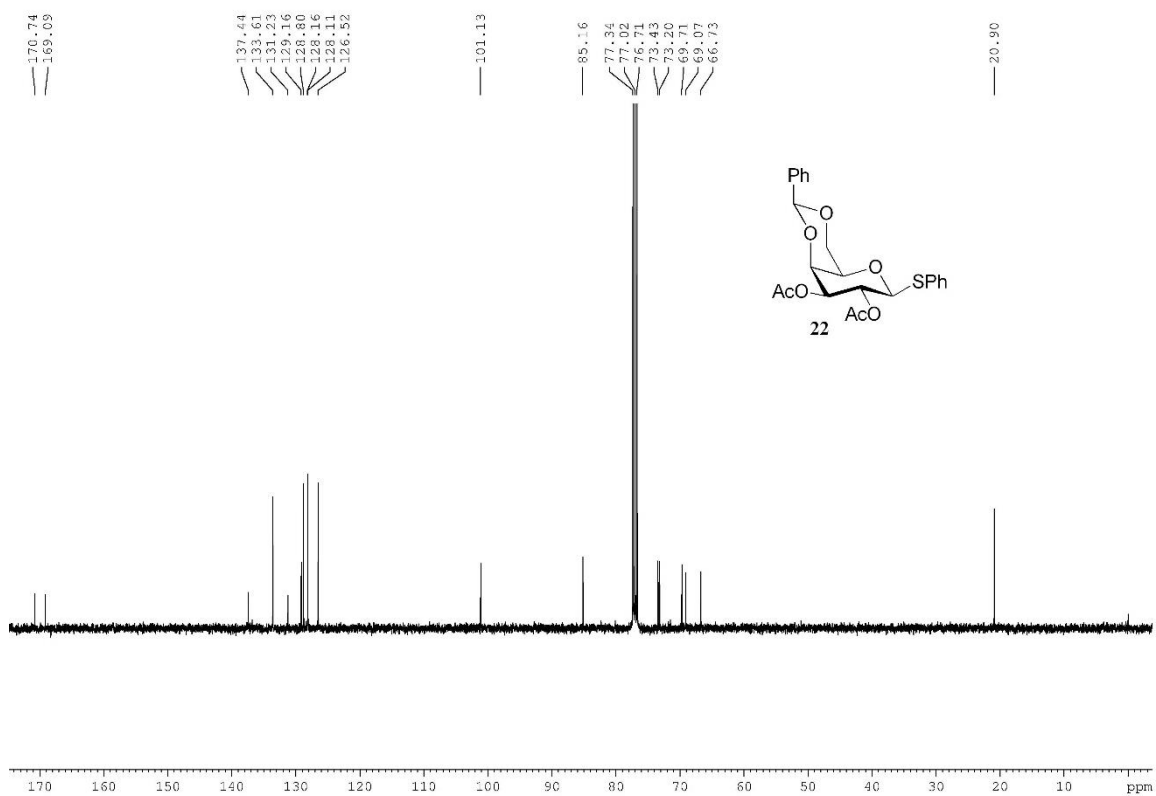



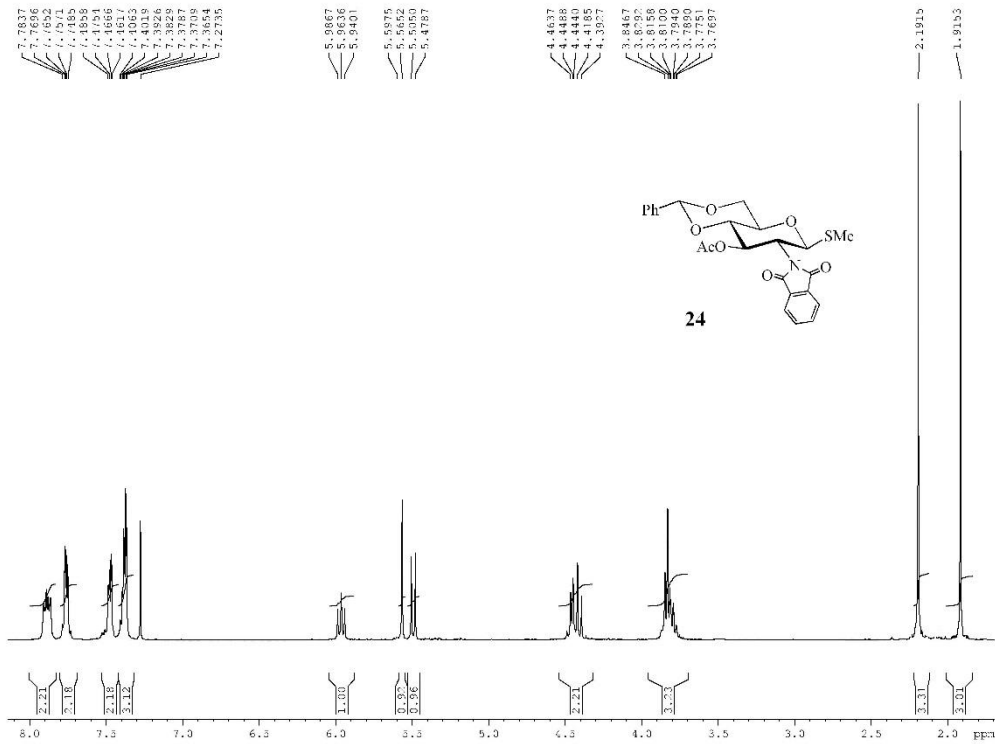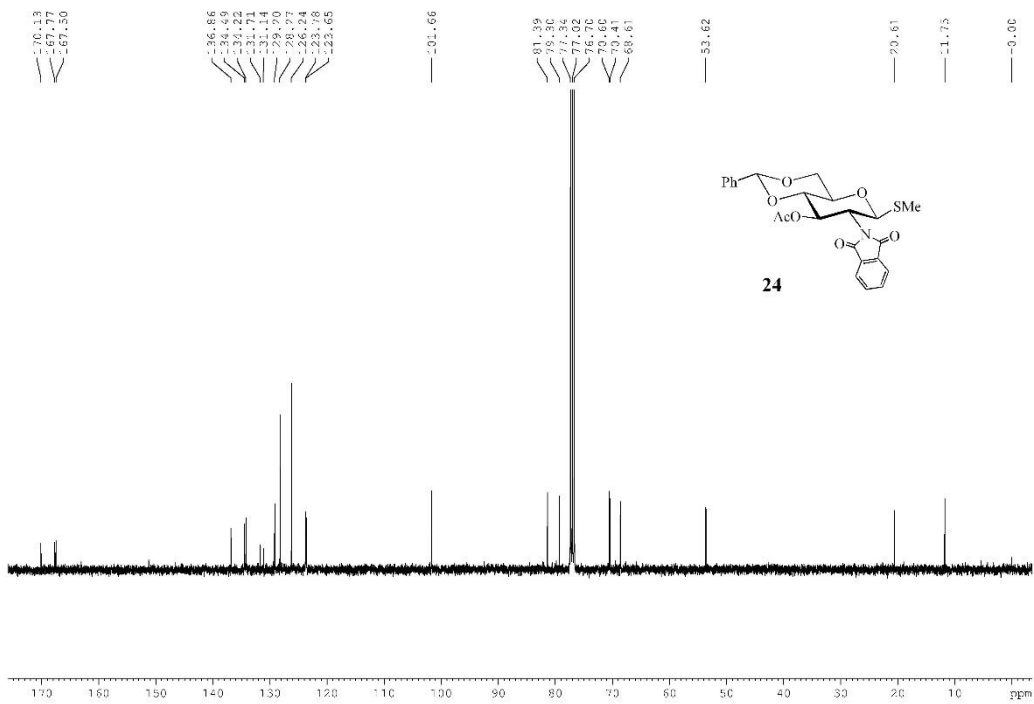

7.4105  
7.4068  
7.4019  
7.3888  
7.3808  
7.3297  
7.3270  
7.3223  
7.3094  
7.3055  
7.2902  
7.2732  
7.2682  
7.2649  
7.2616  
7.2530  
7.2471  
7.2405  
7.2323  
7.2291  
7.2262  
5.5929  
5.5908  
5.5848  
5.5827  
5.1722  
5.1529  
5.1461  
5.1269  
5.0919  
5.0836  
5.0658  
5.0575  
4.3979  
4.3786  
3.8525  
3.8509  
3.8363  
3.8333  
3.8186  
3.4976  
3.4402  
3.4262  
3.4177  
3.4037  
3.1495  
3.1278  
3.1070  
2.0912  
2.0840  
2.0541  
2.0048  
1.9970  
1.9039

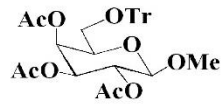

26

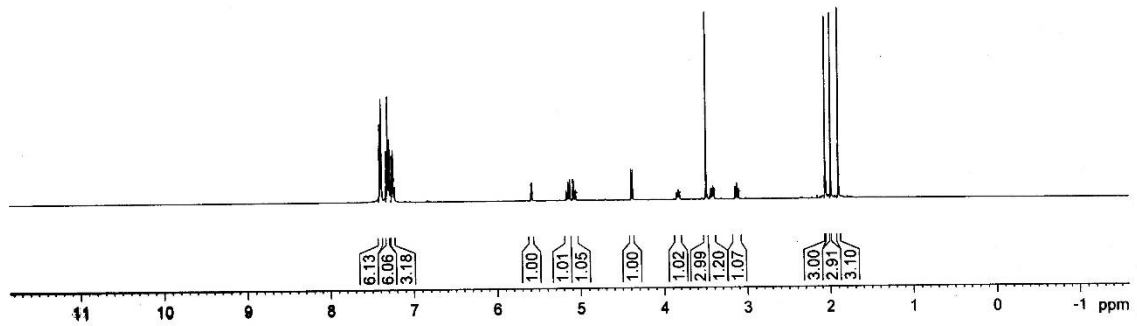

170.21  
169.94  
169.52  
143.34  
128.64  
127.88  
127.15  
102.05  
86.87  
77.36  
77.04  
76.72  
72.10  
71.23  
69.16  
67.39  
60.84  
56.92  
20.78  
20.62  
20.54

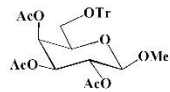

26

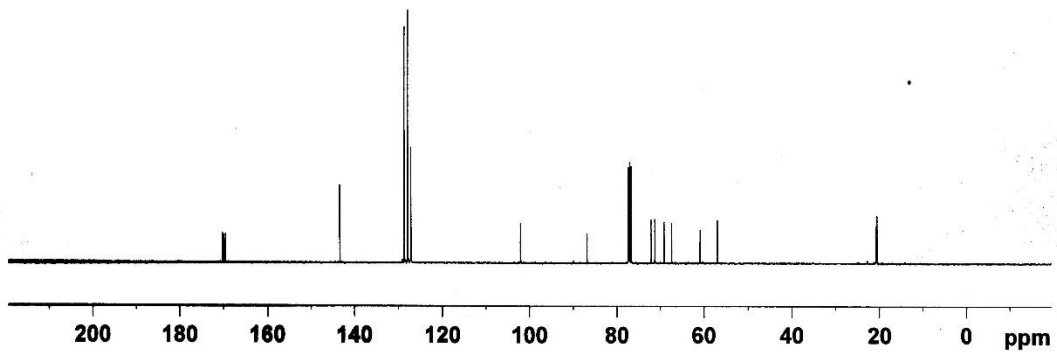

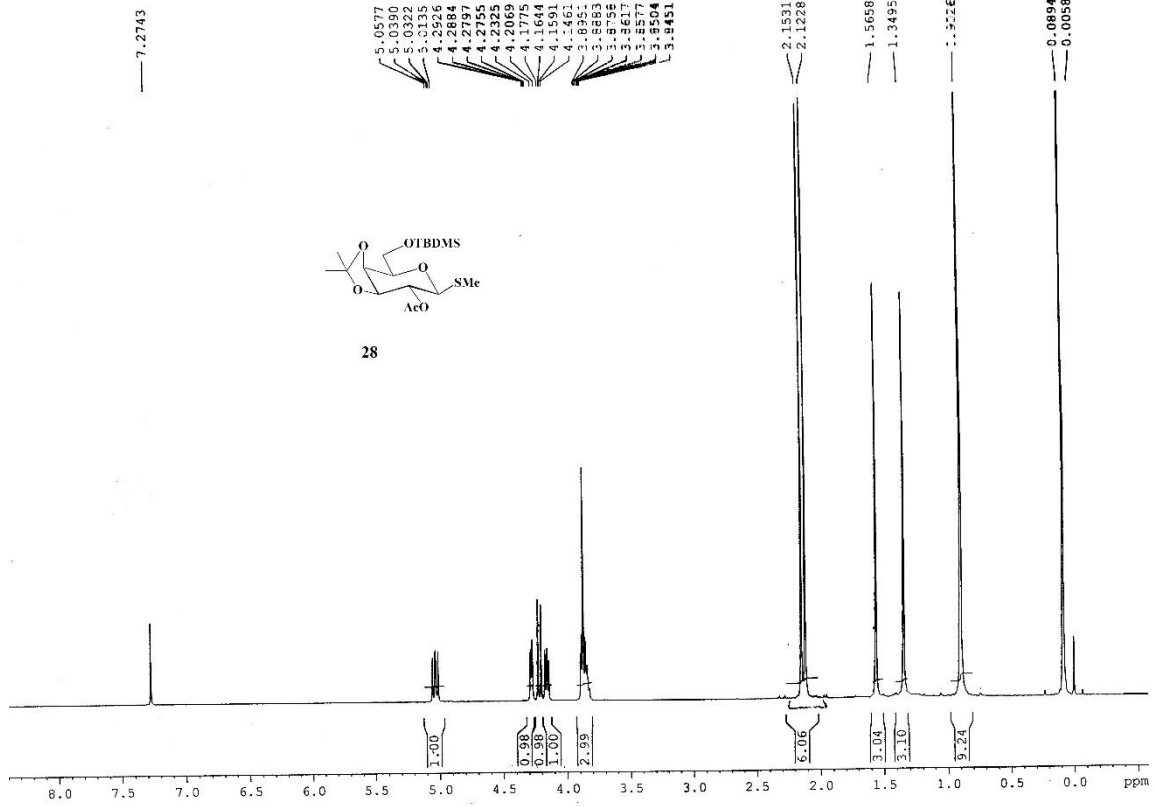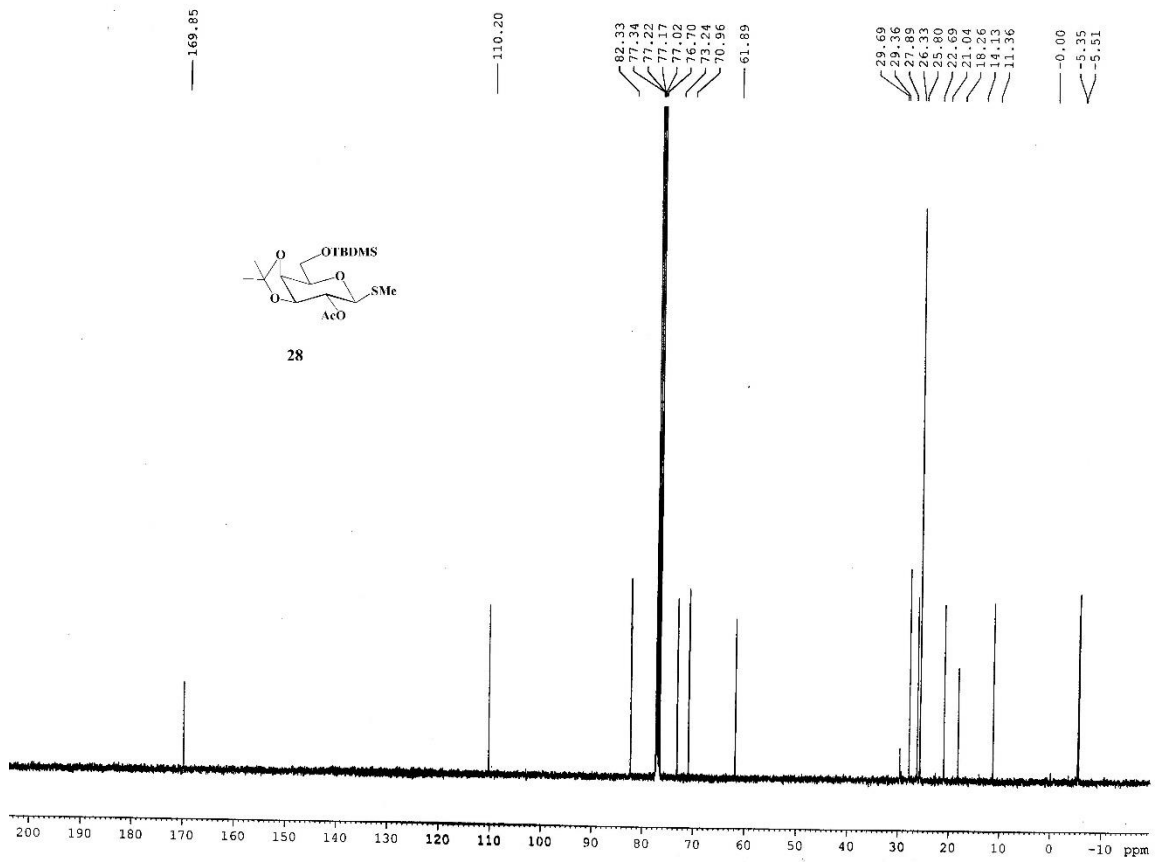

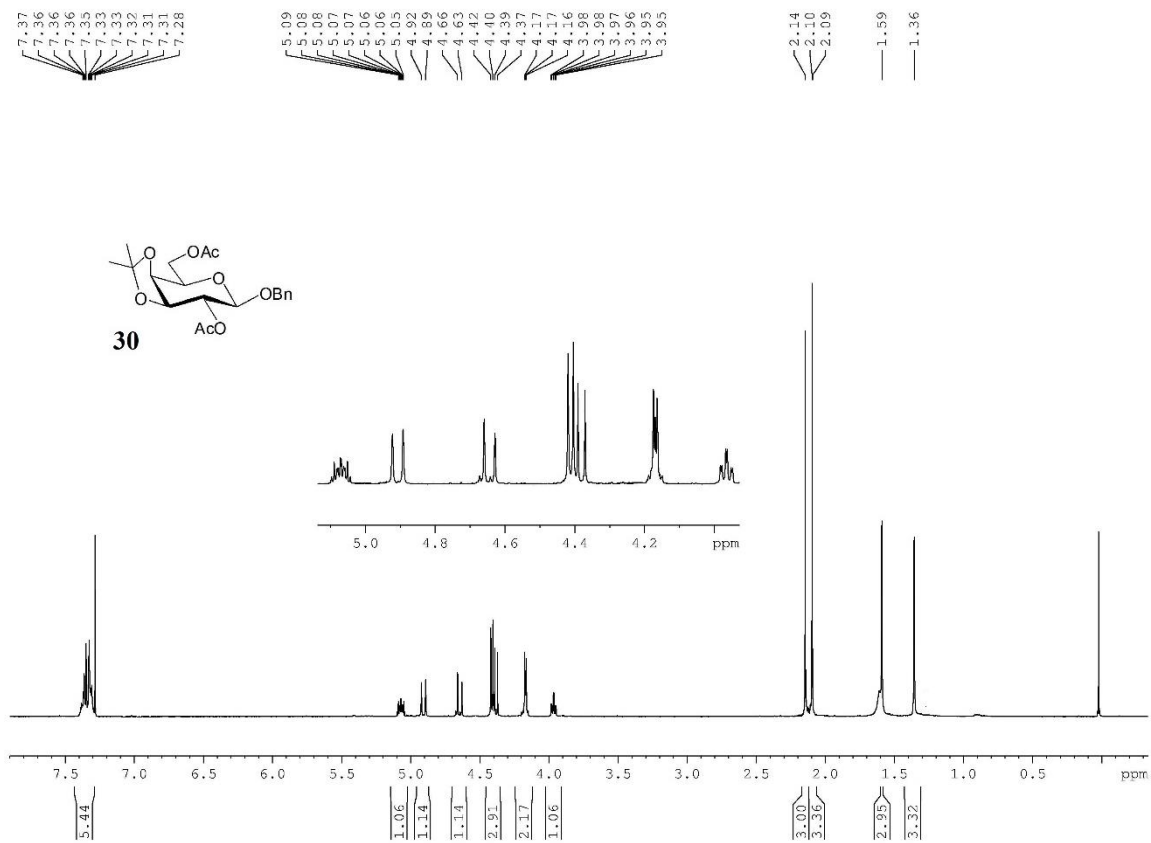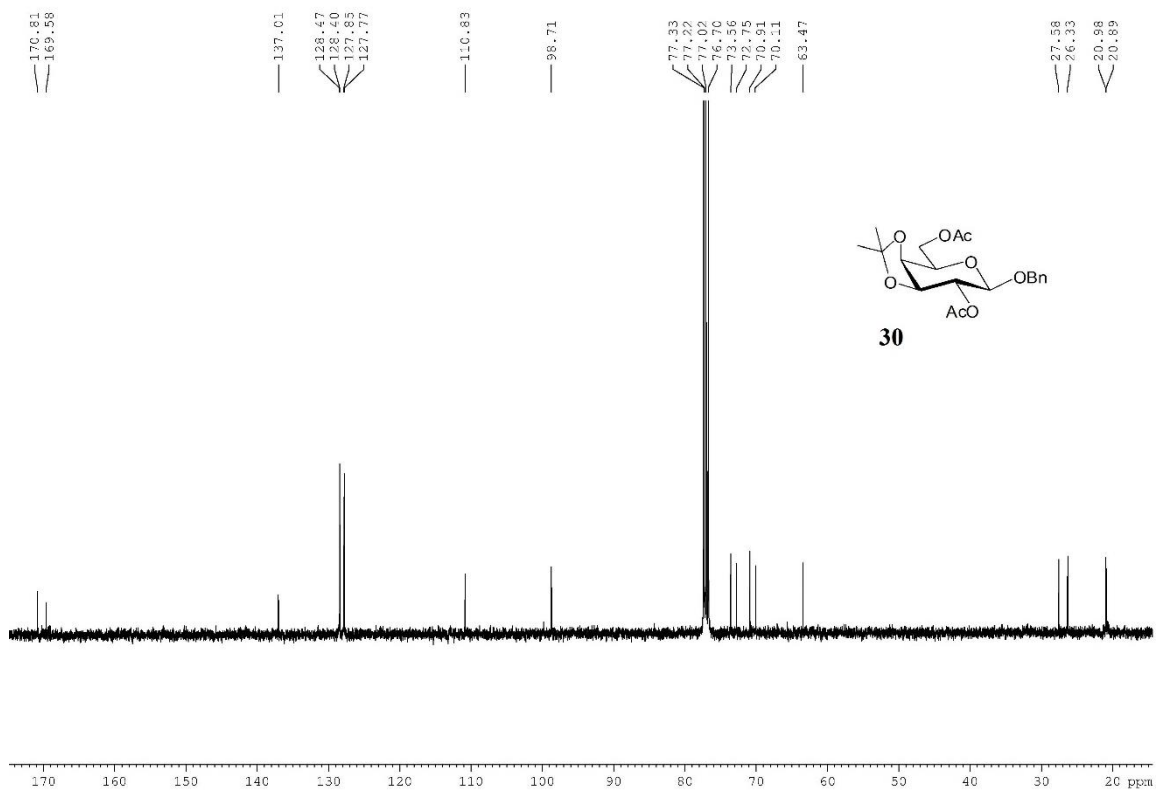

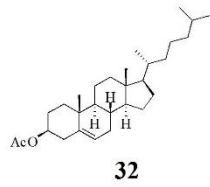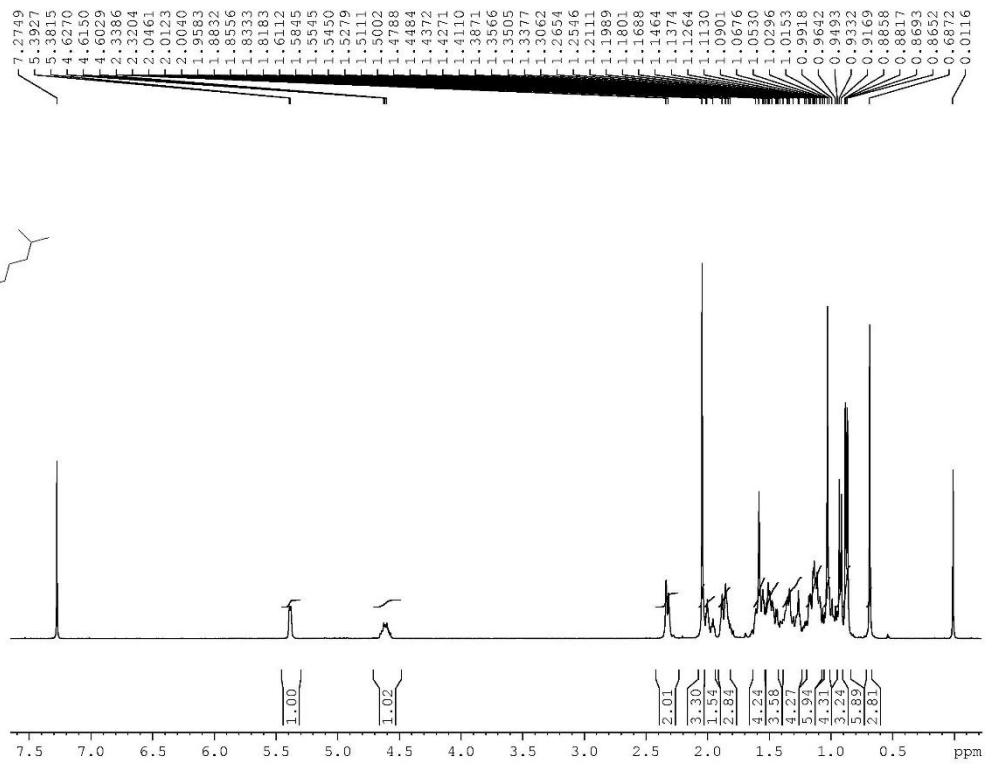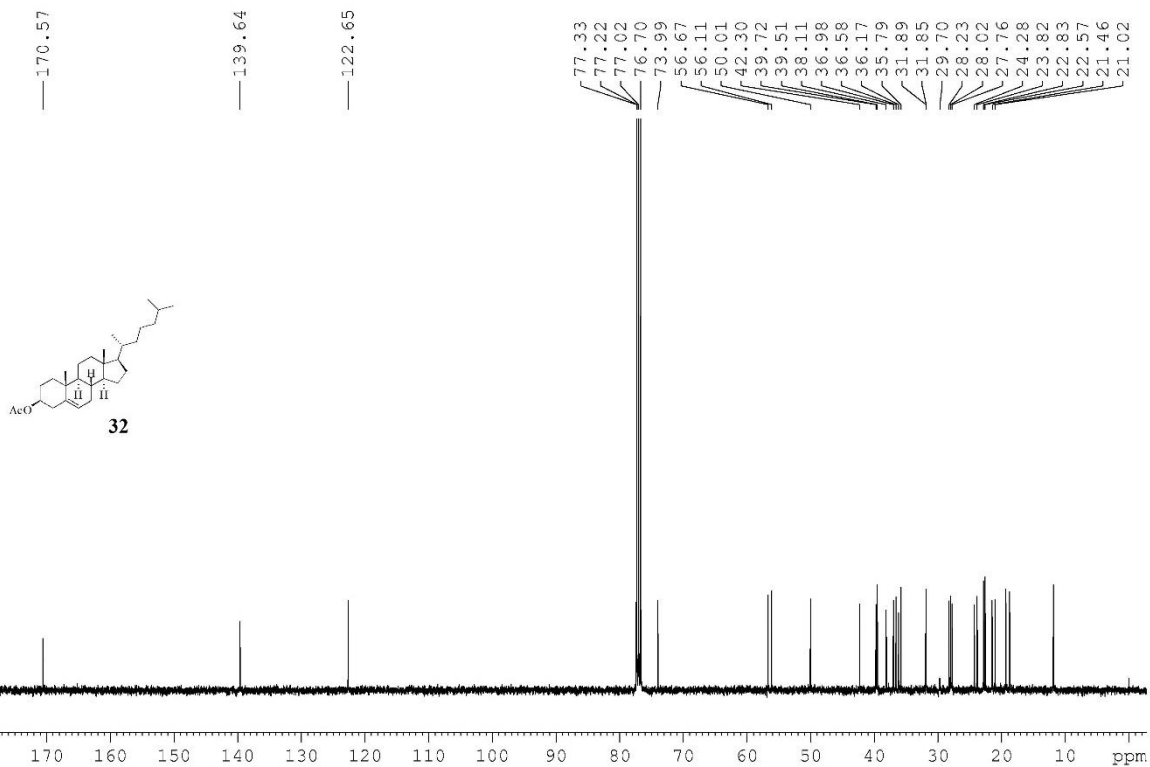

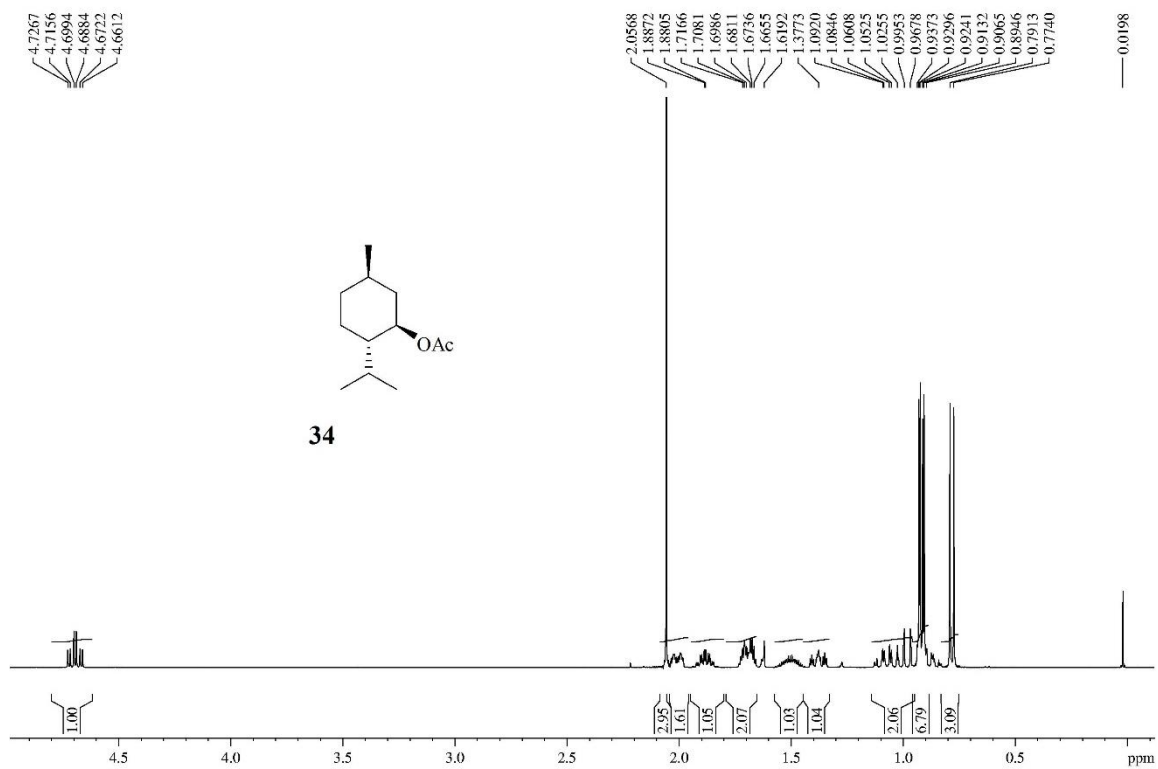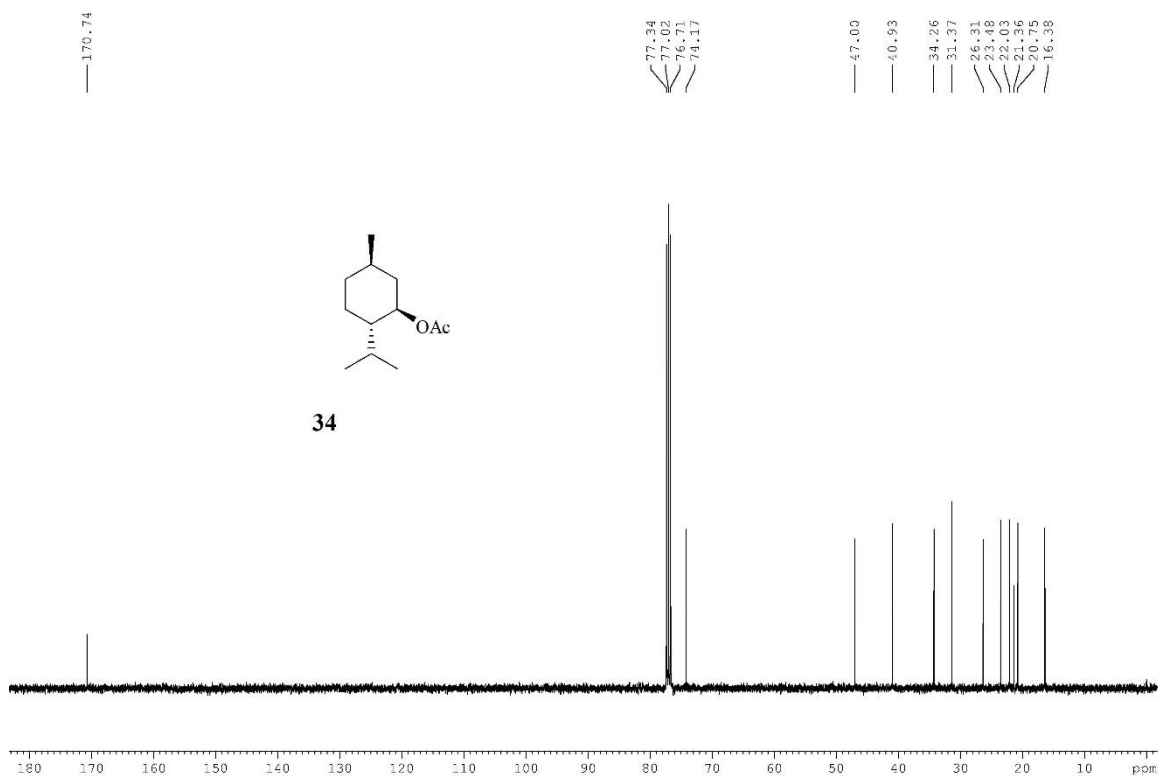

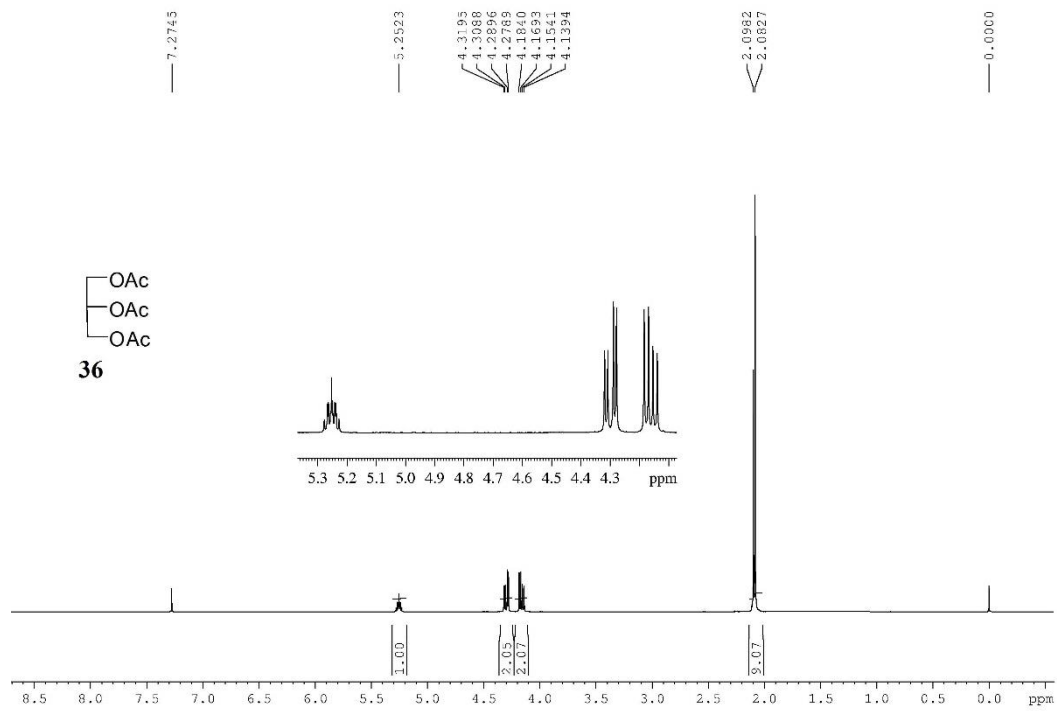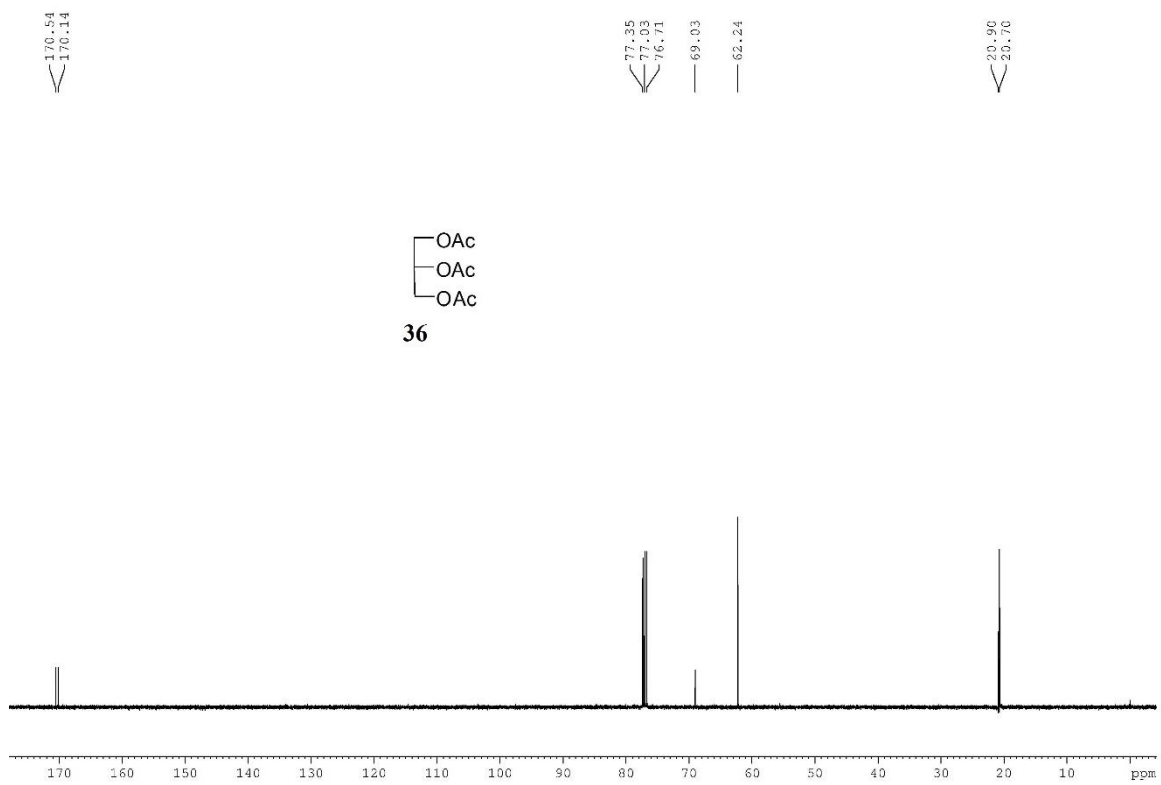

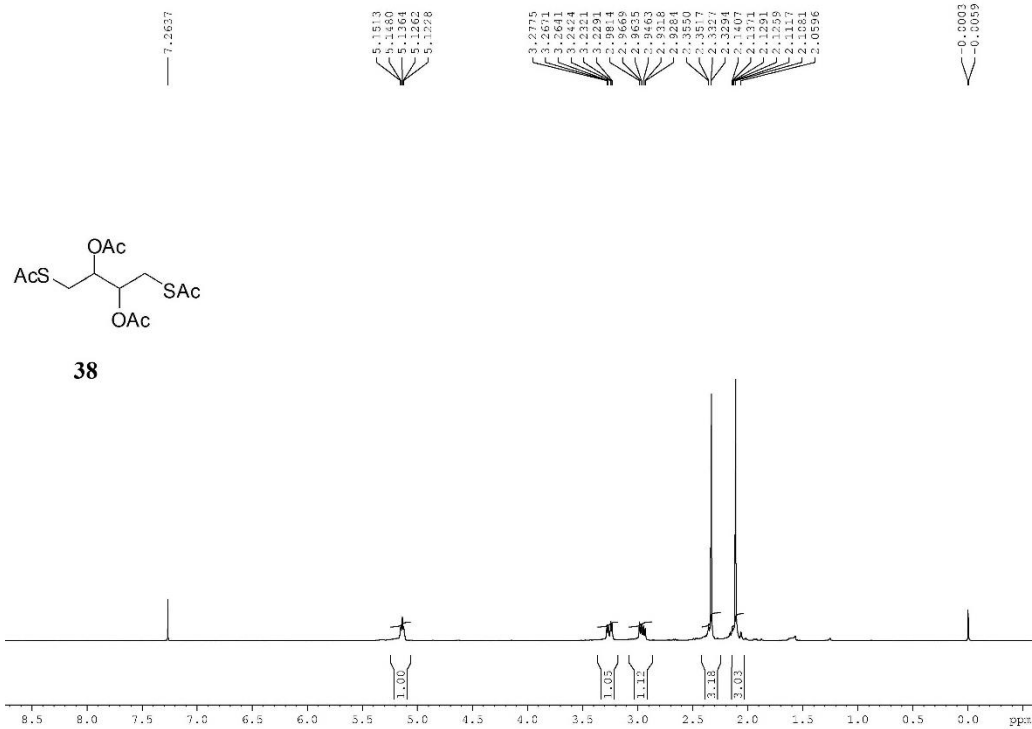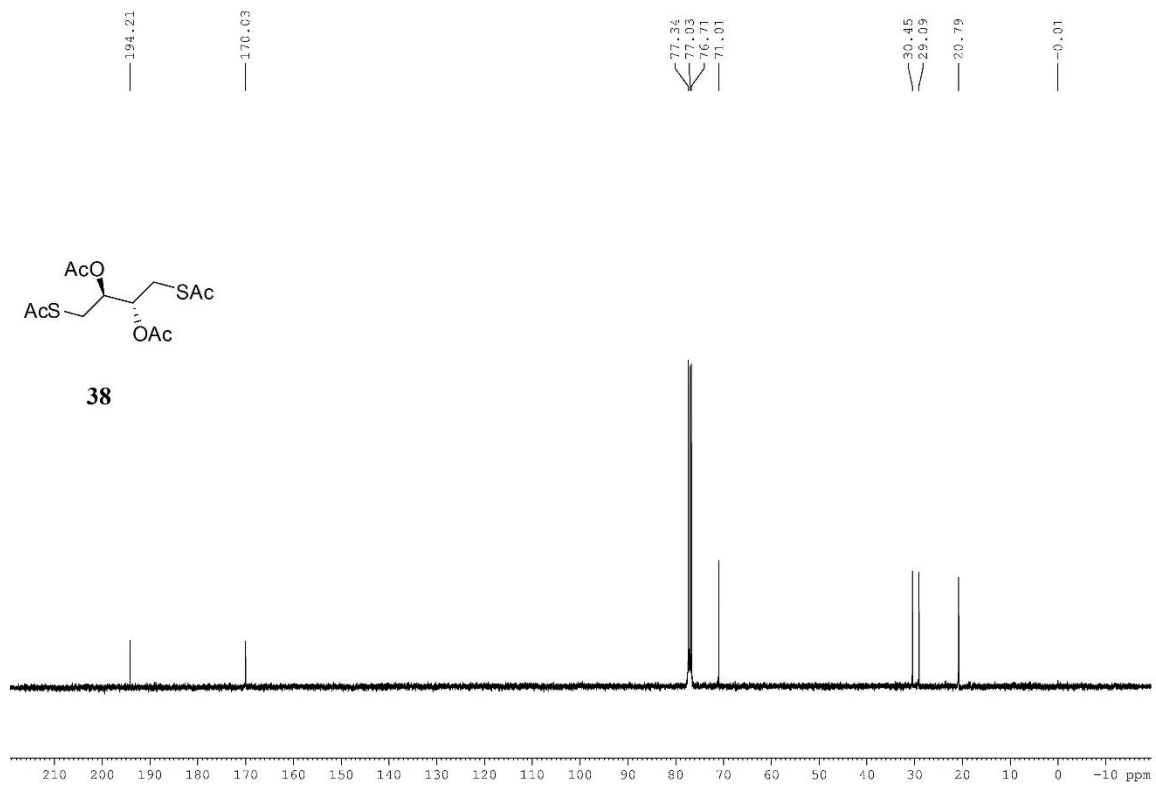



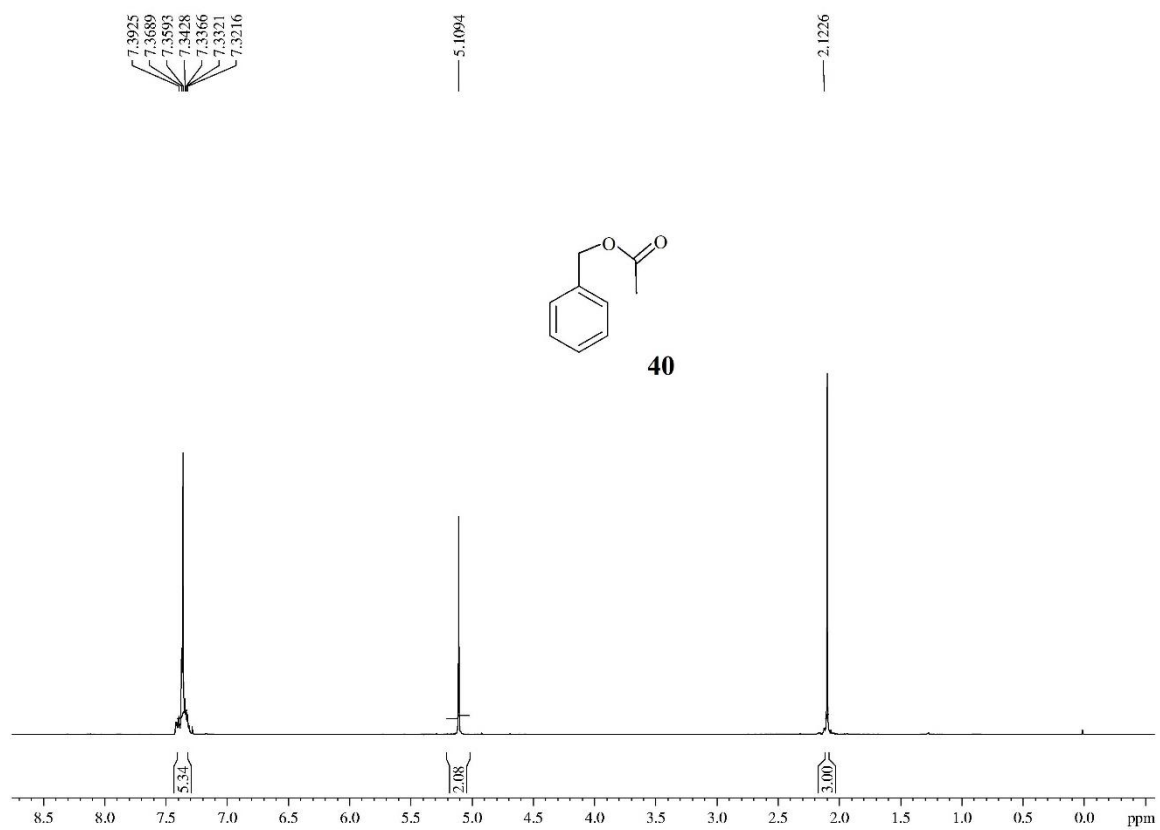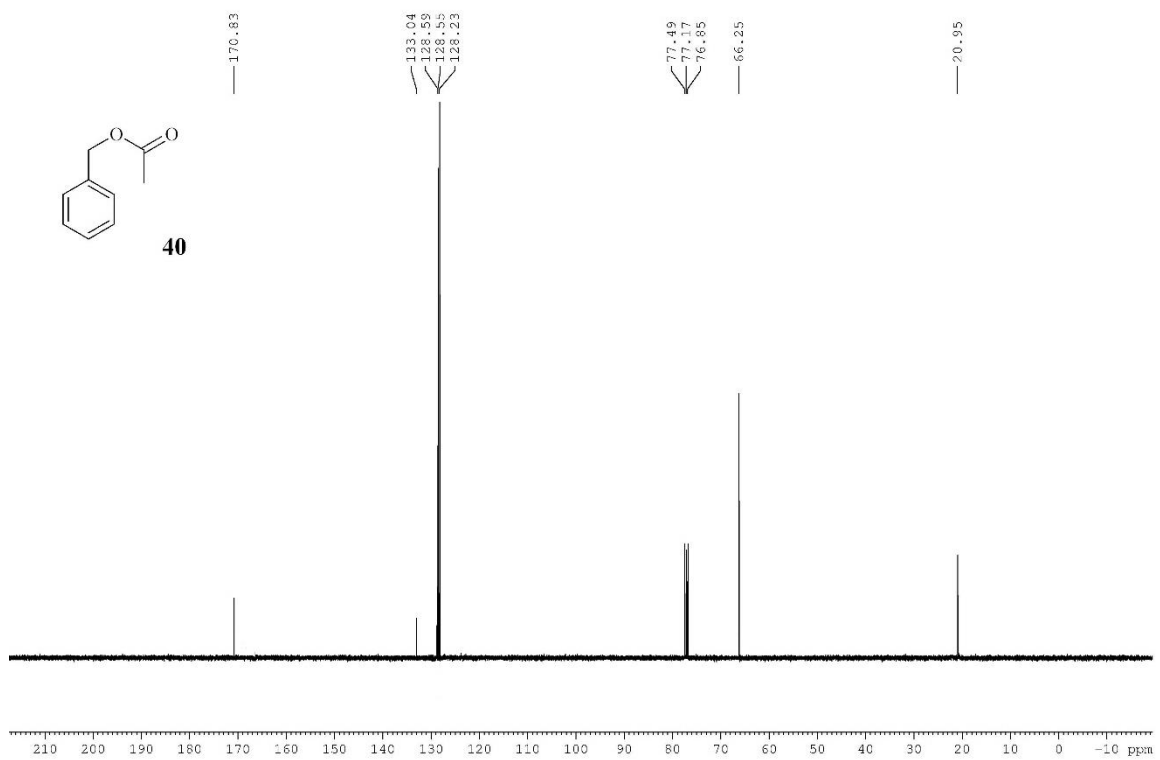

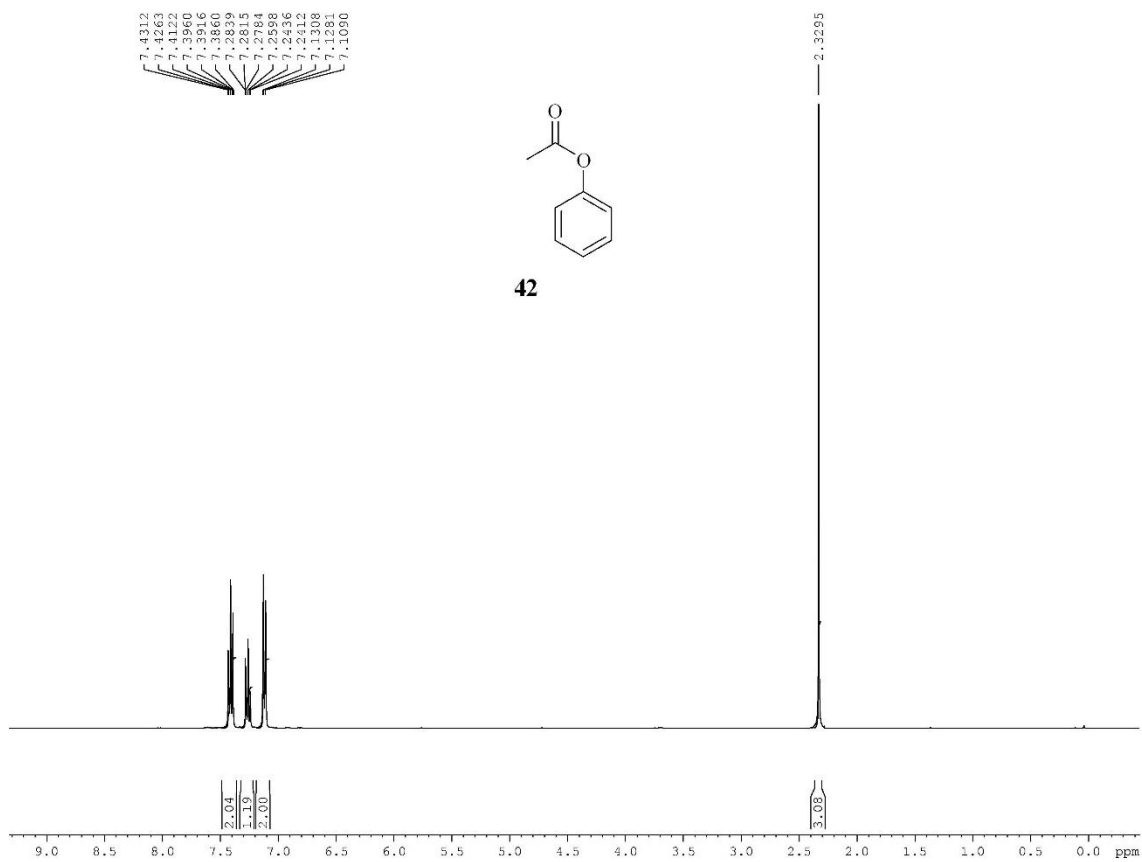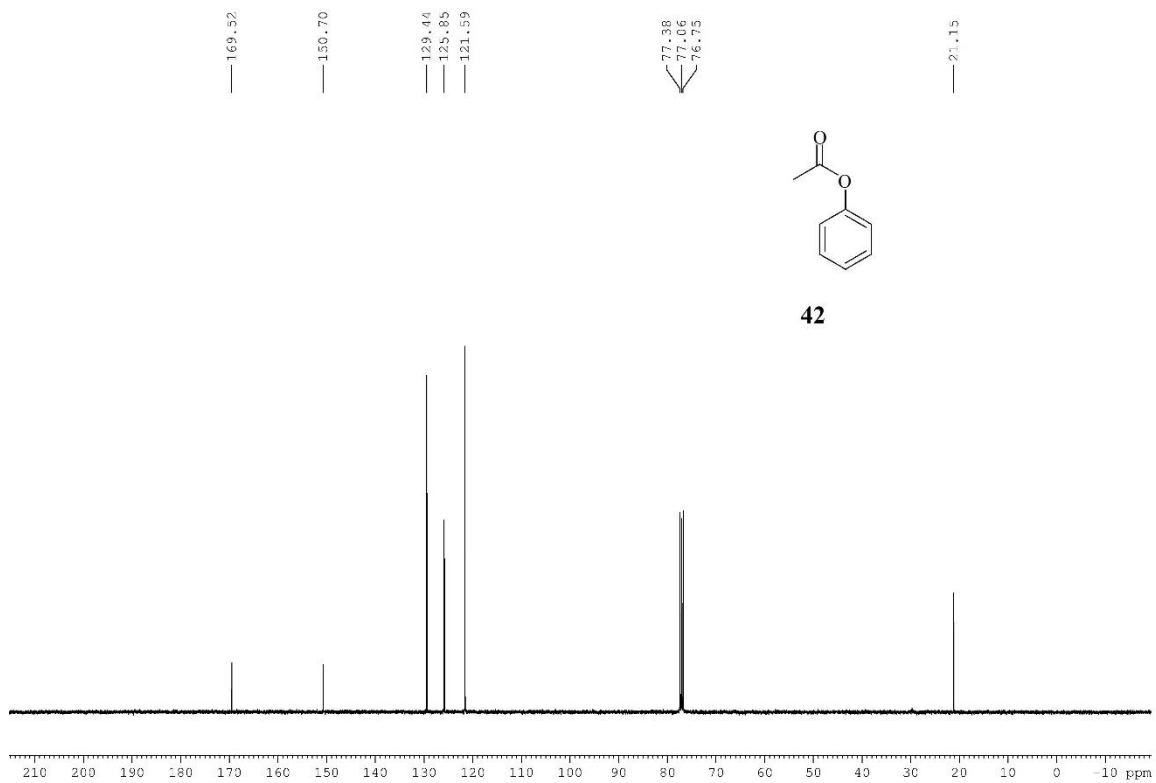

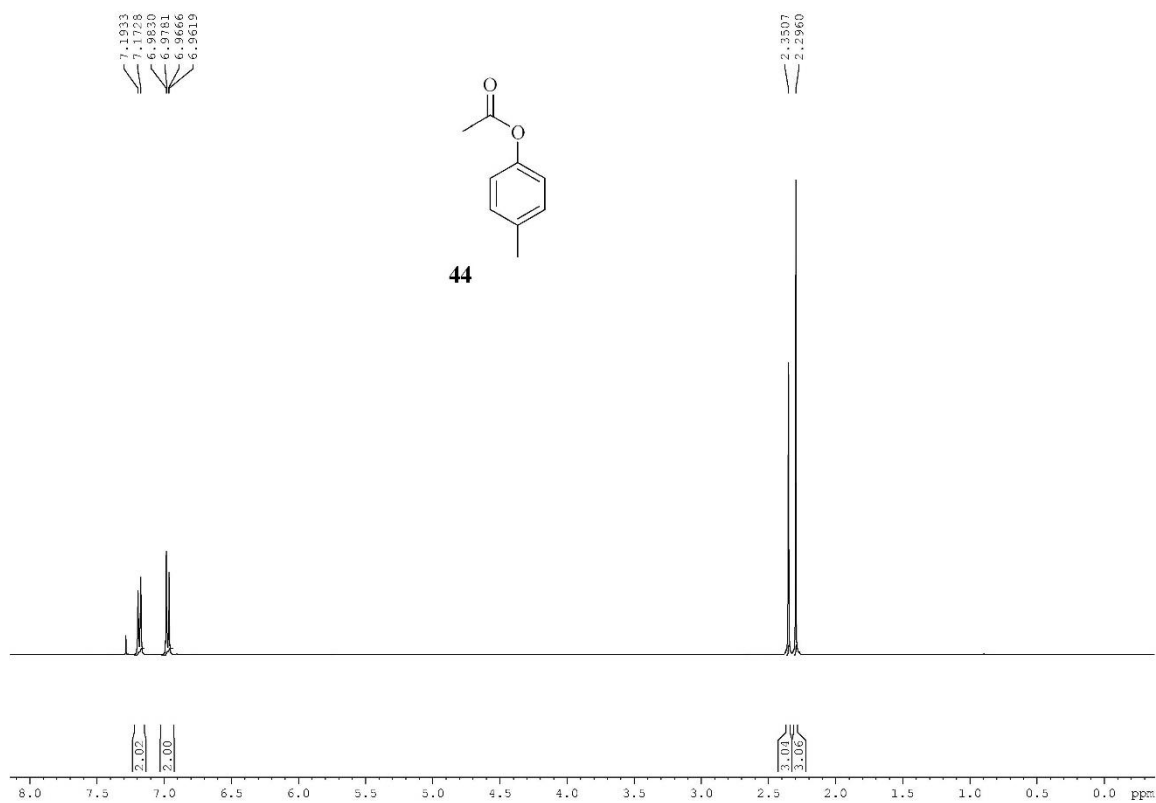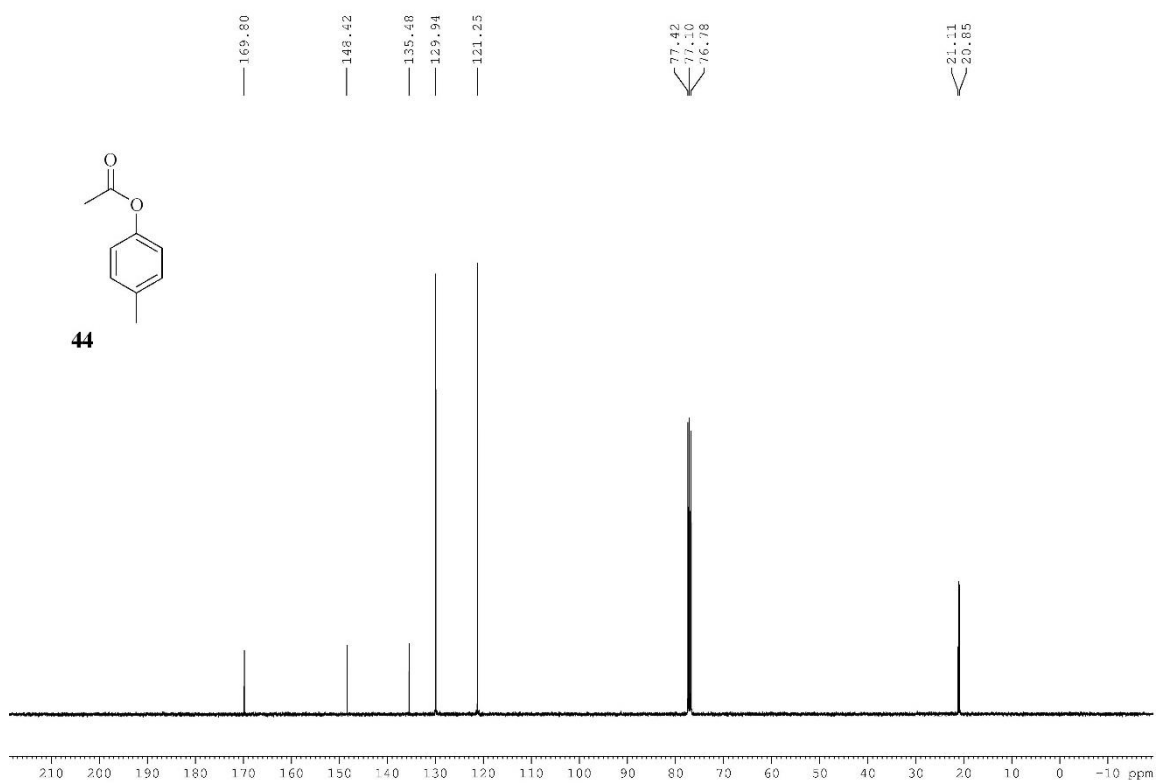

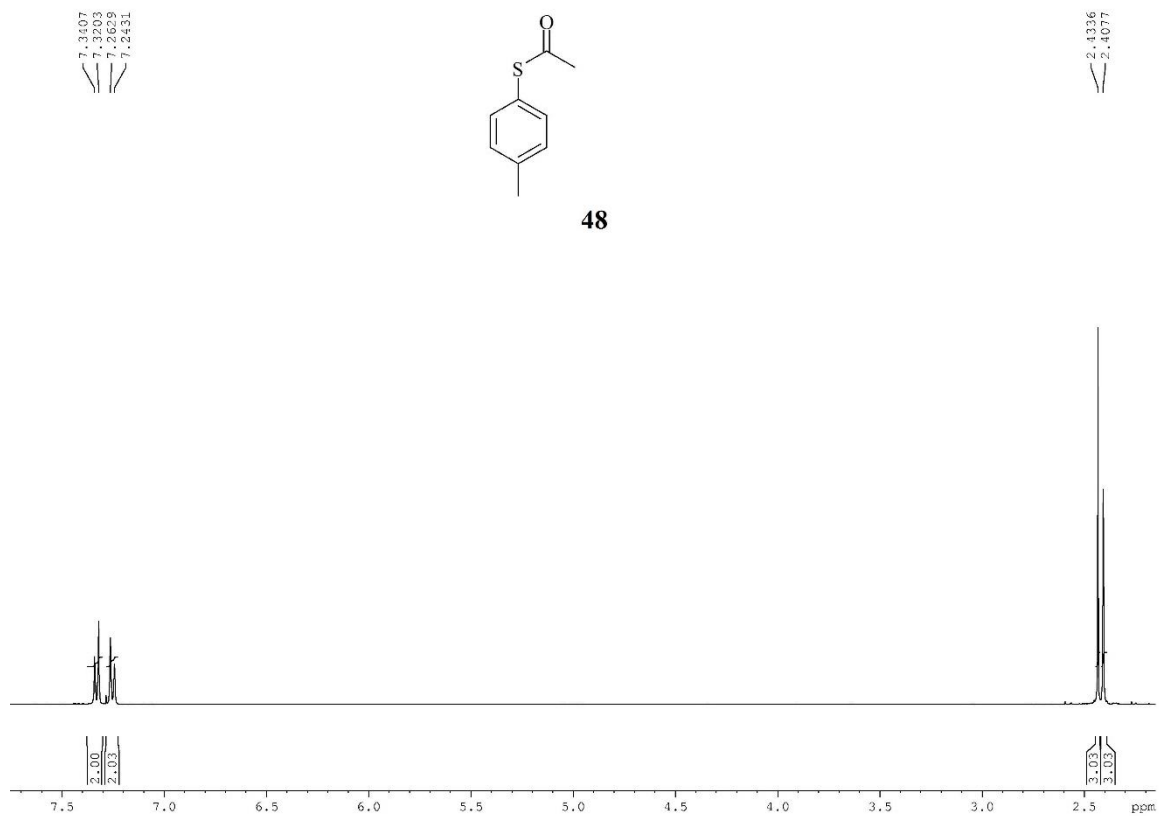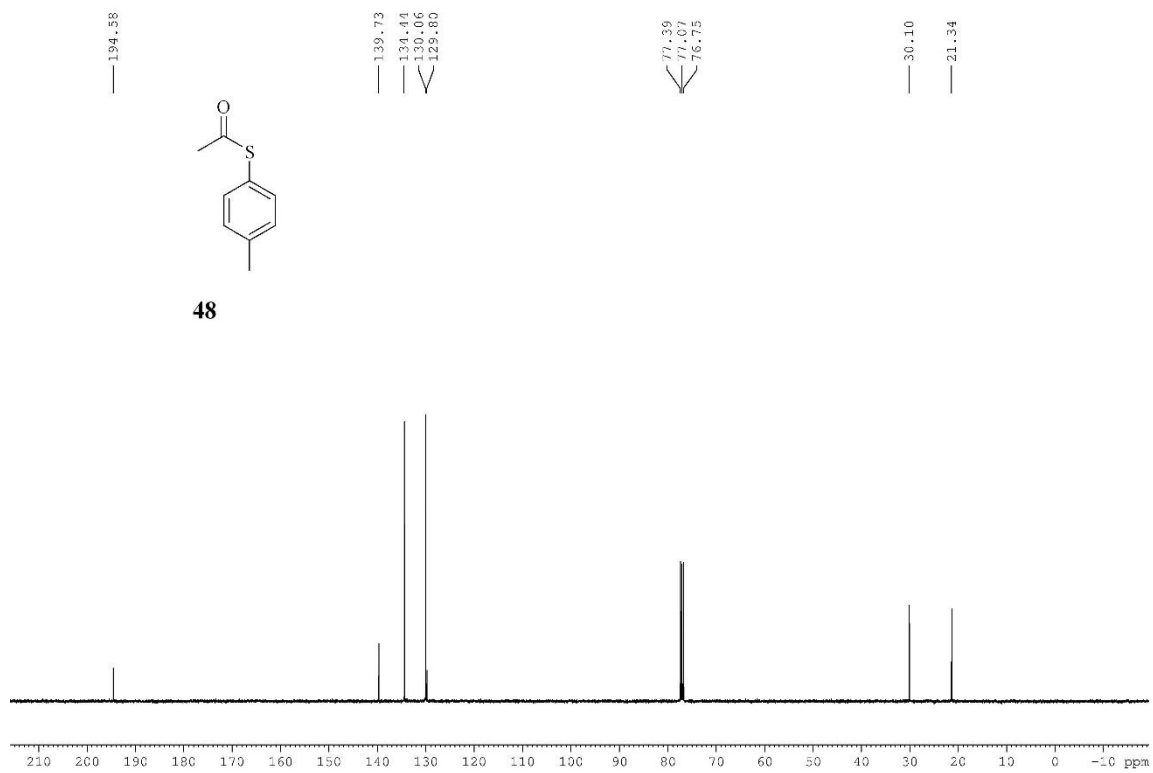

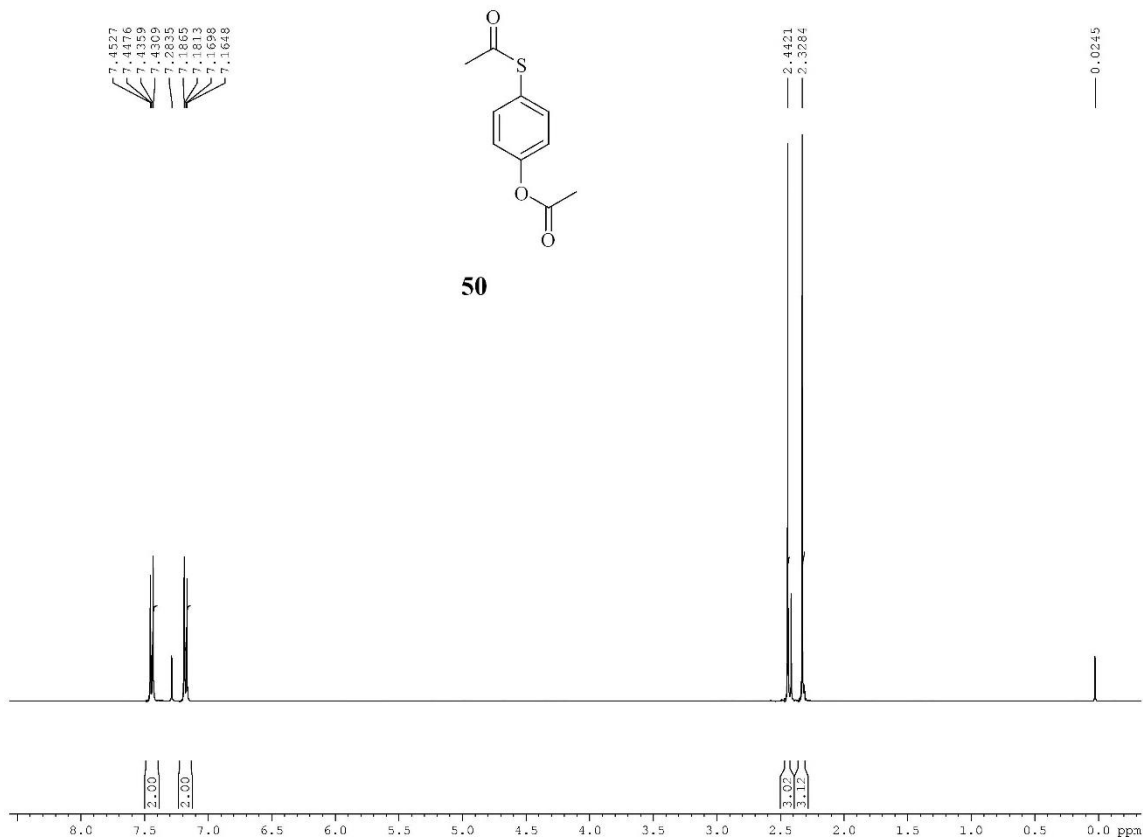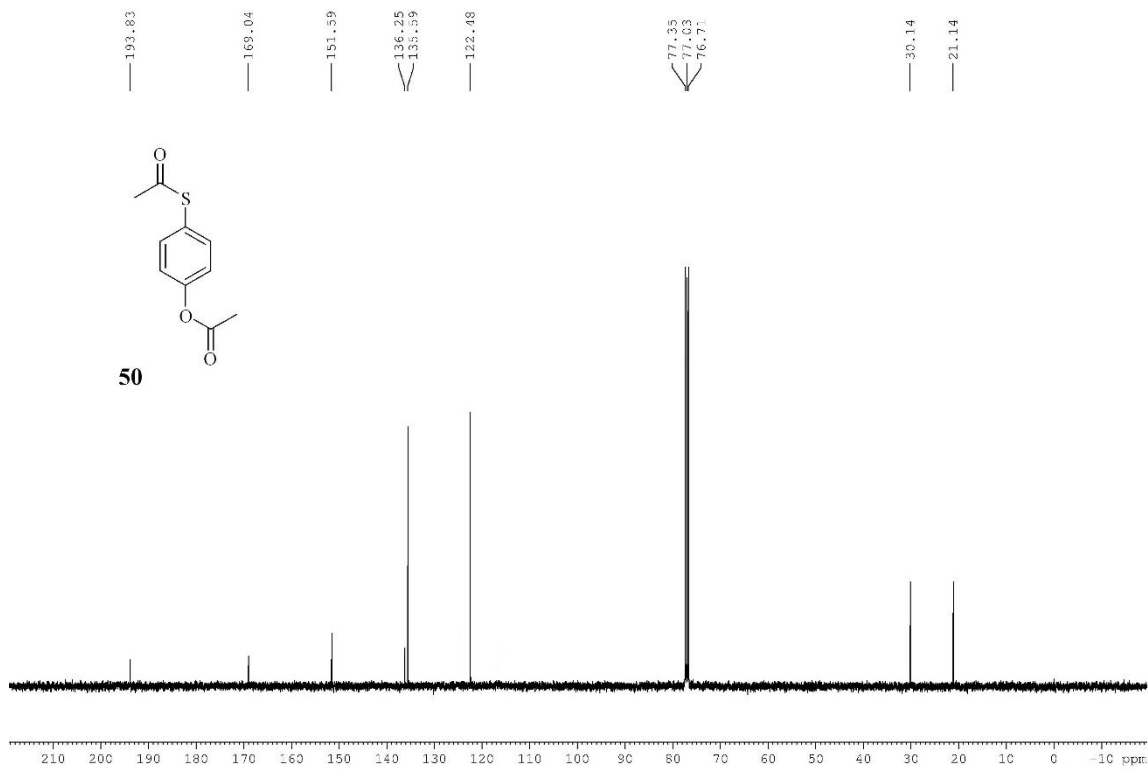

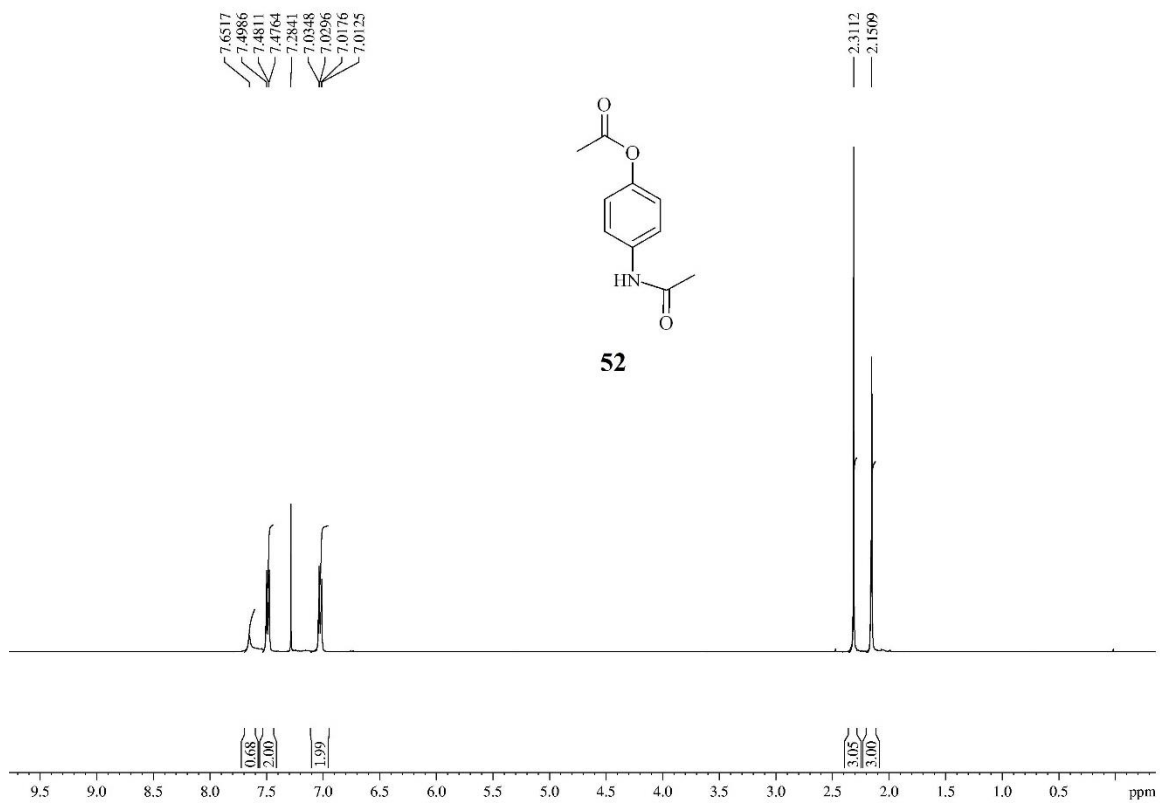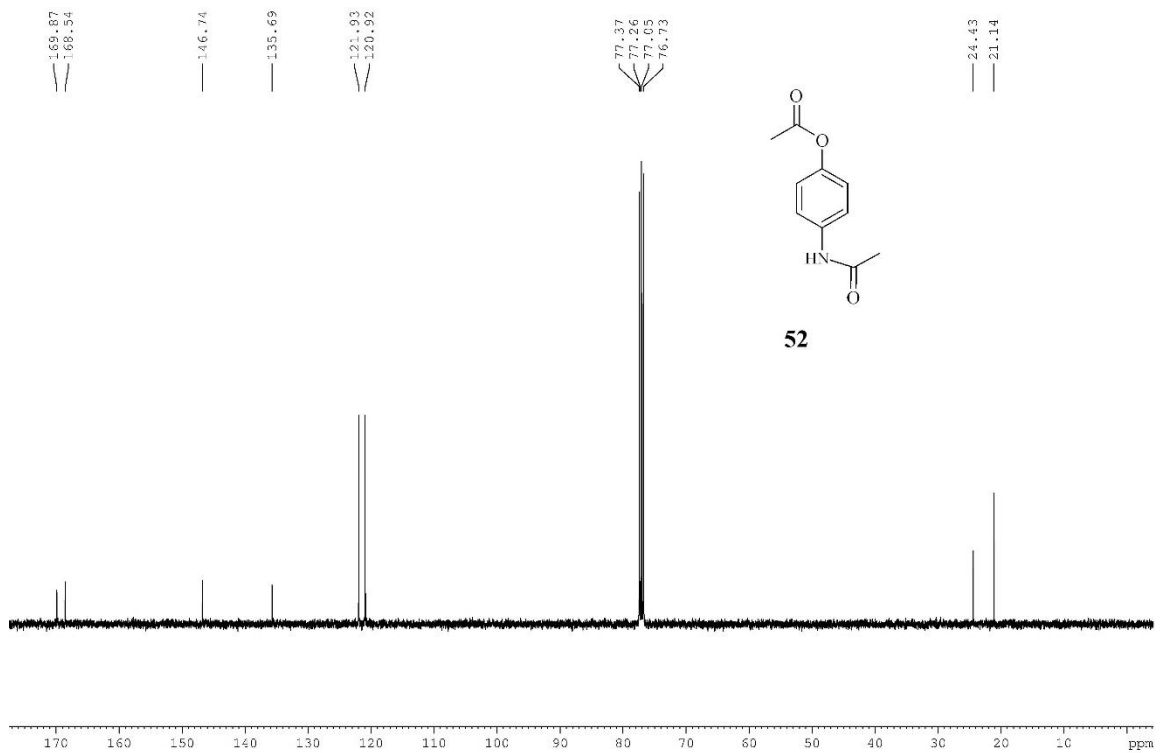

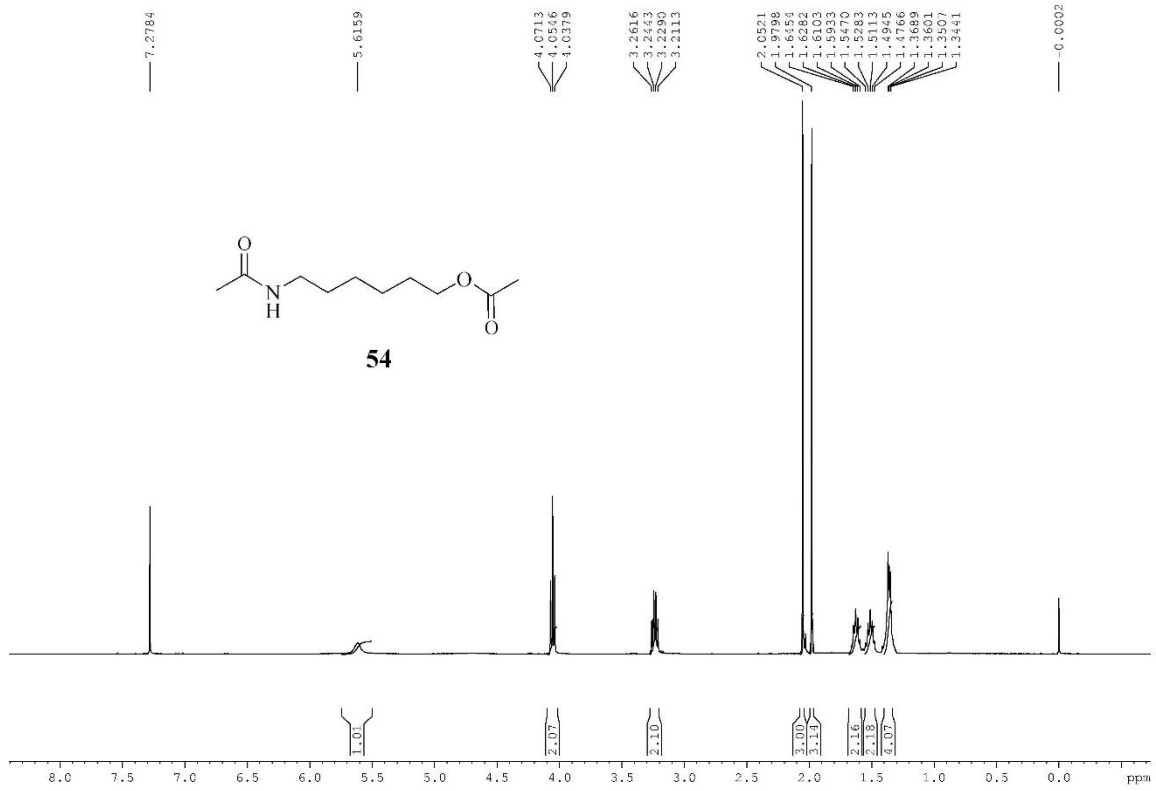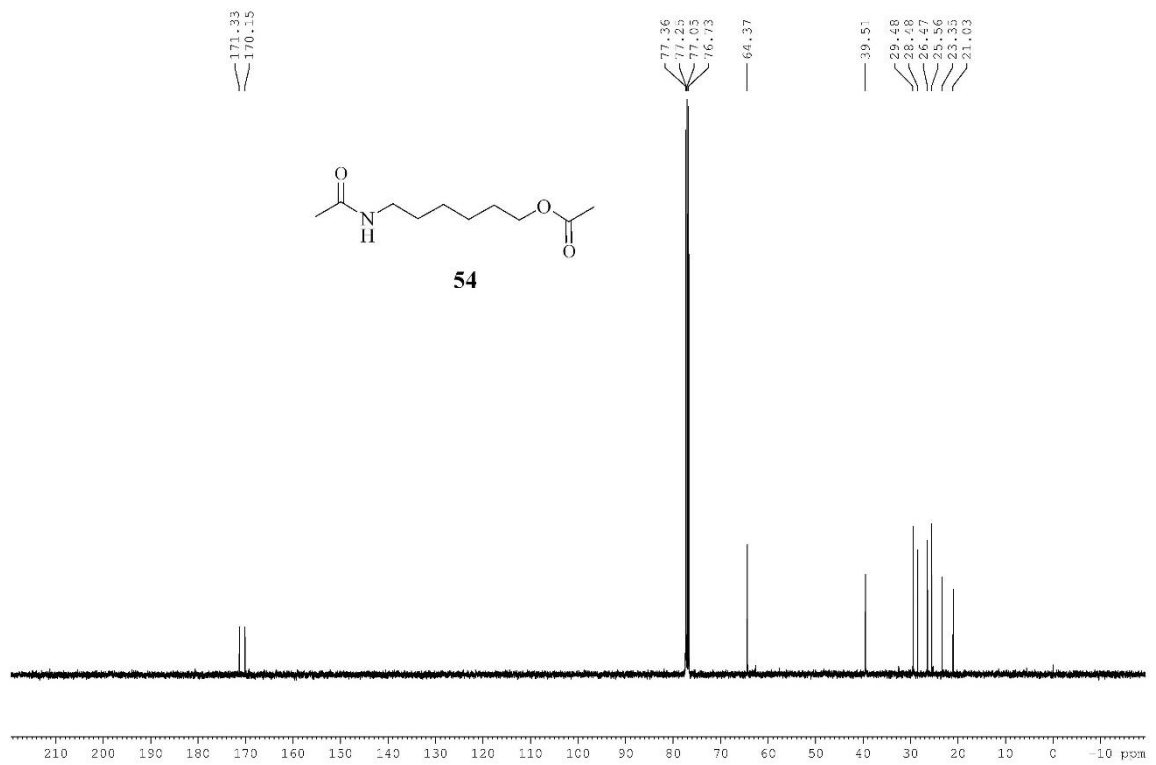

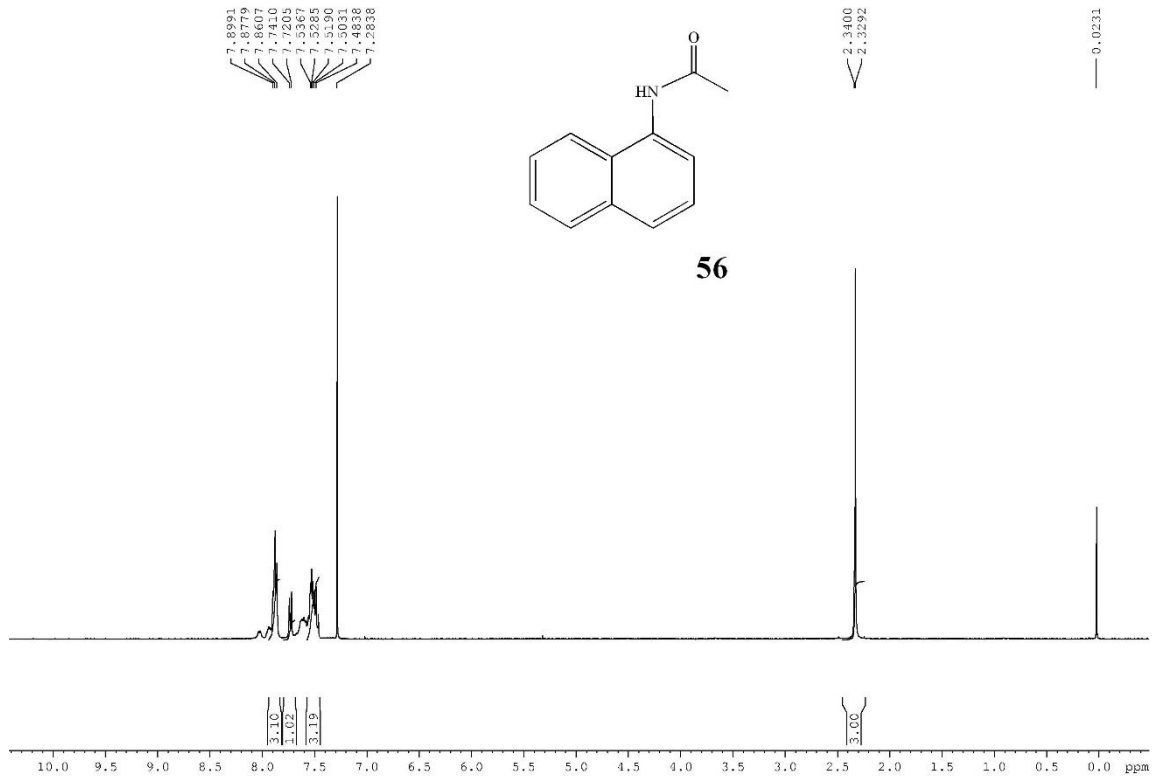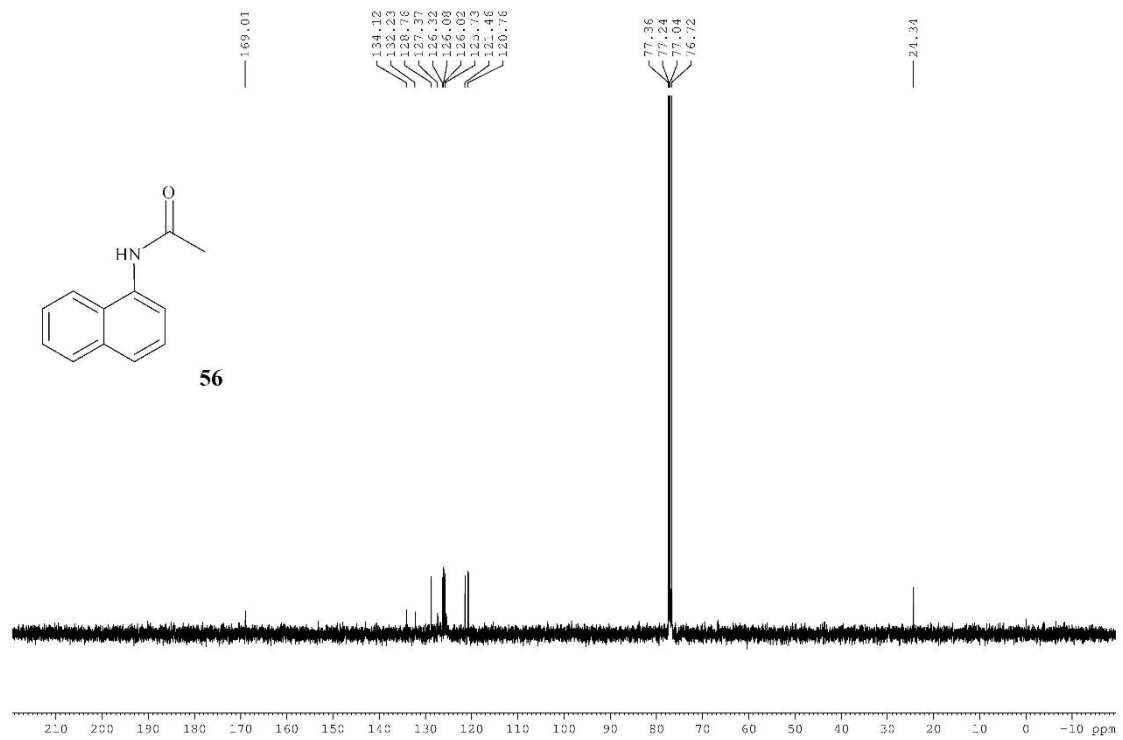



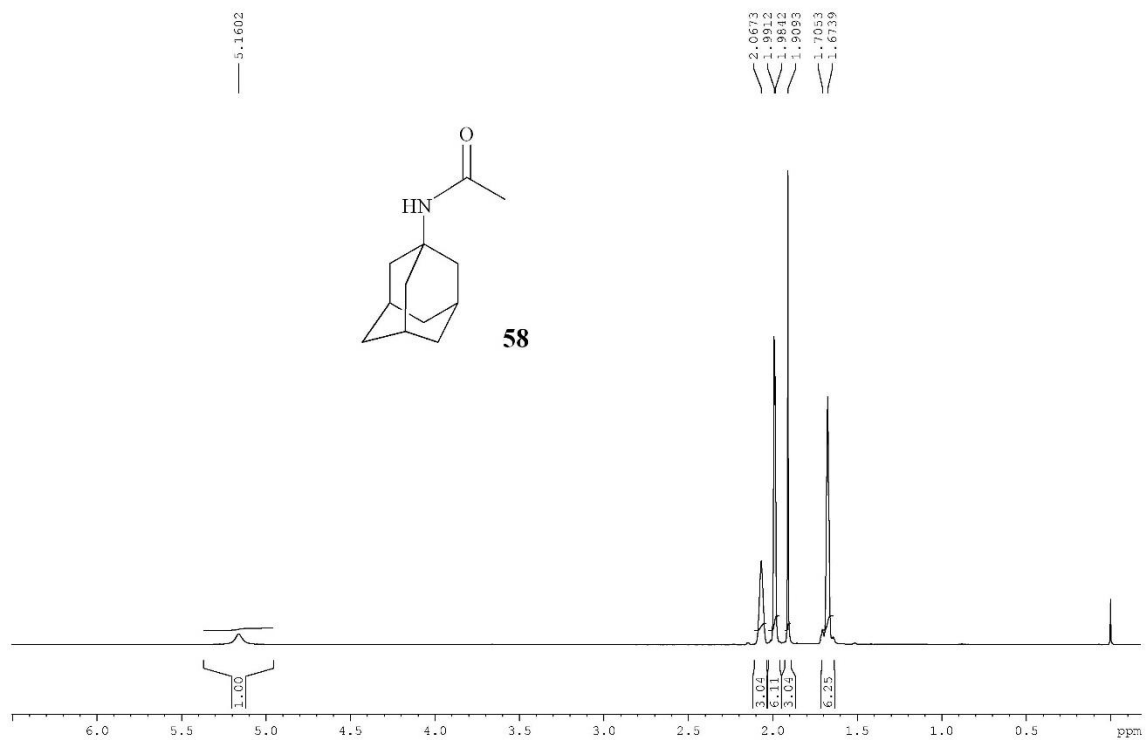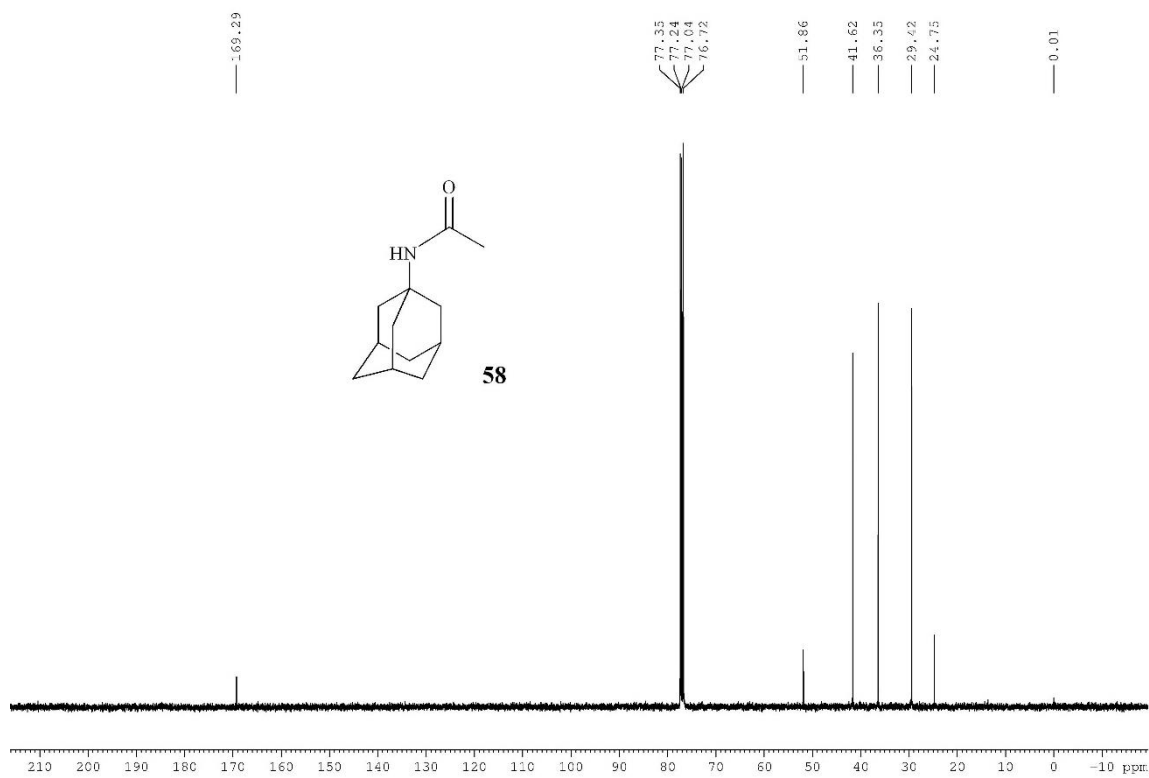

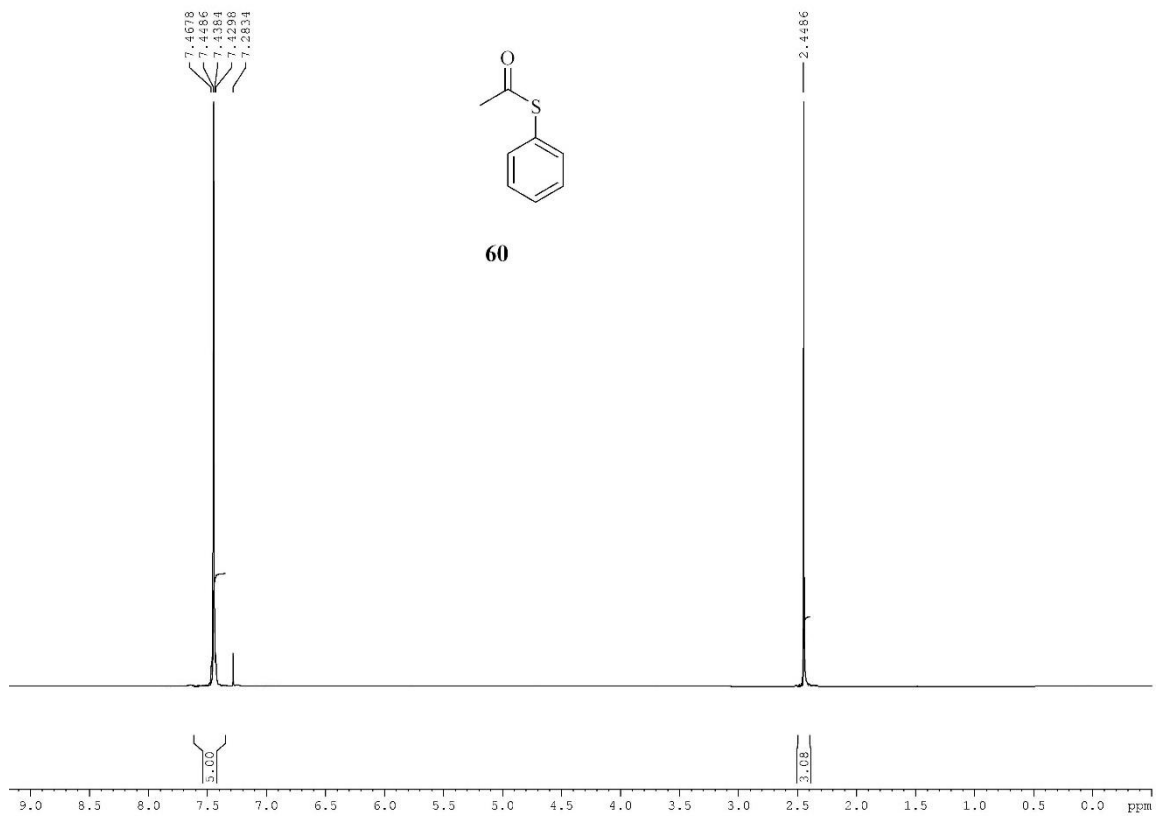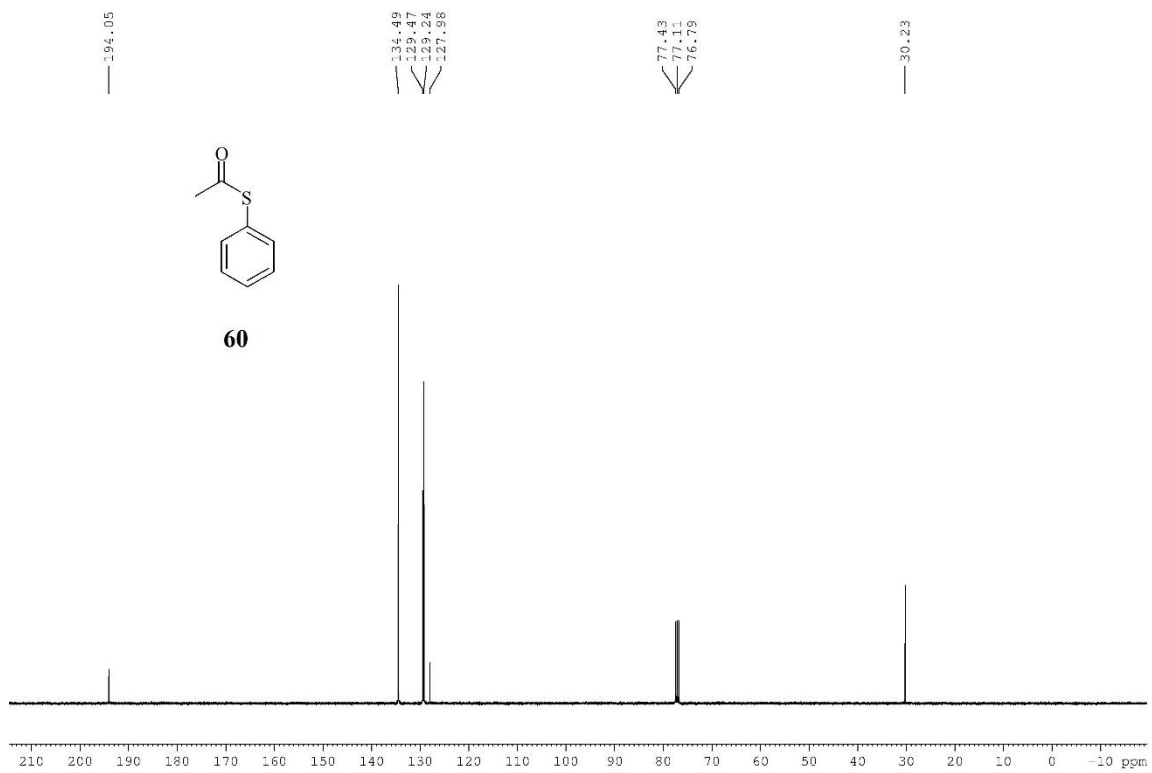

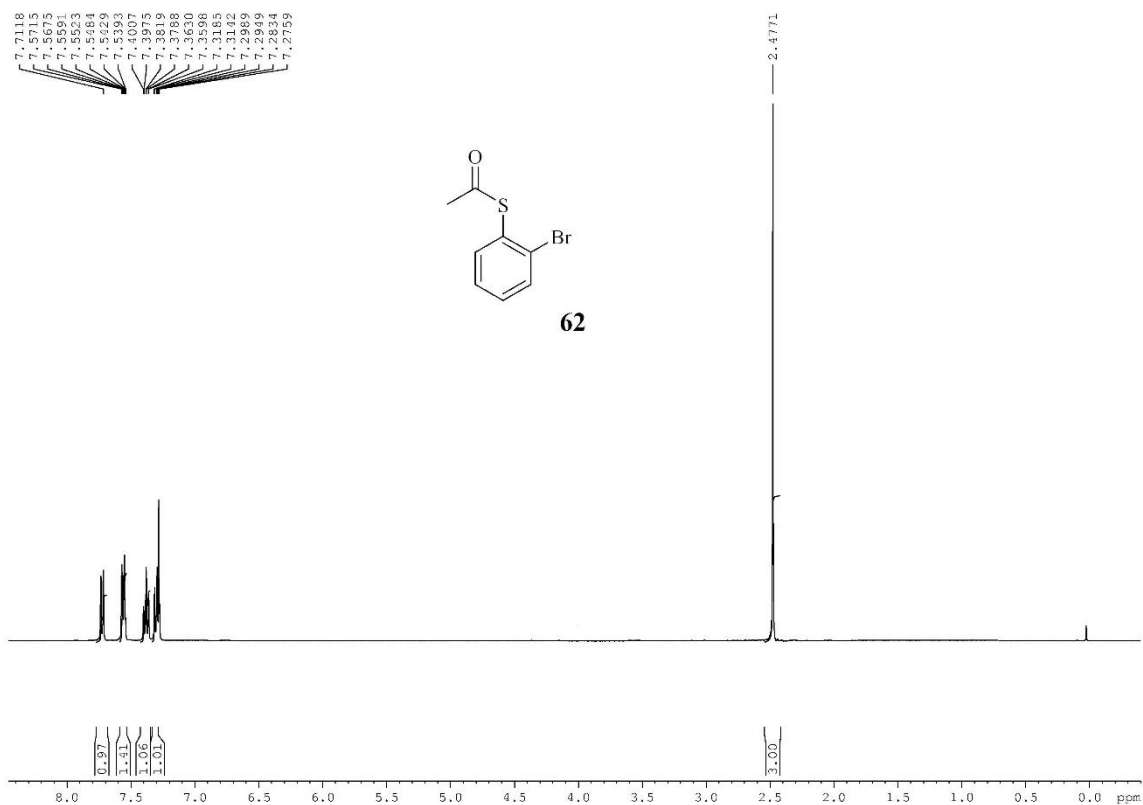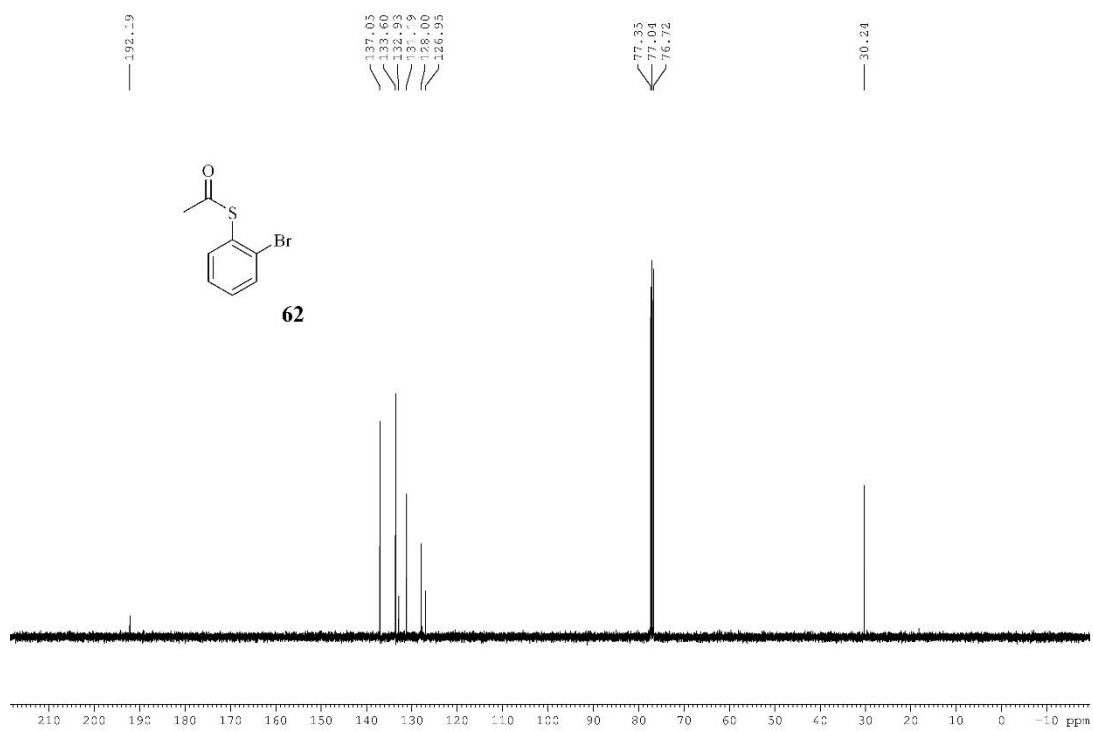

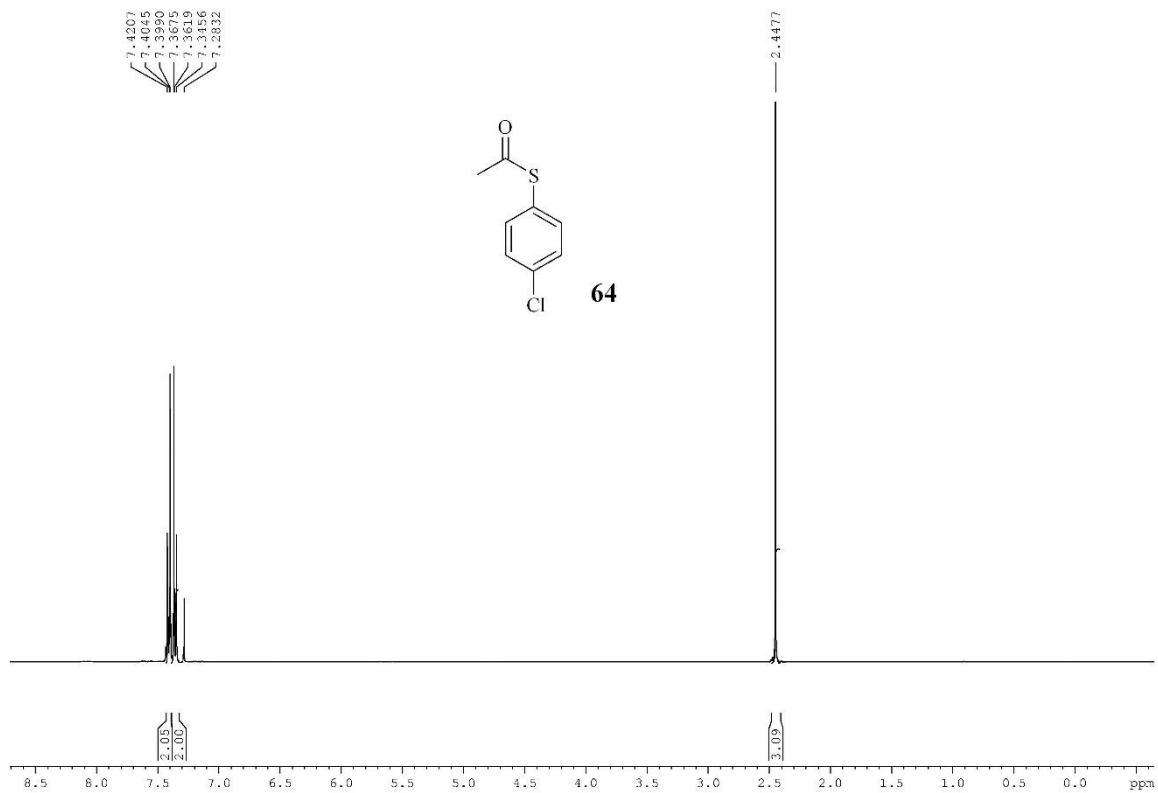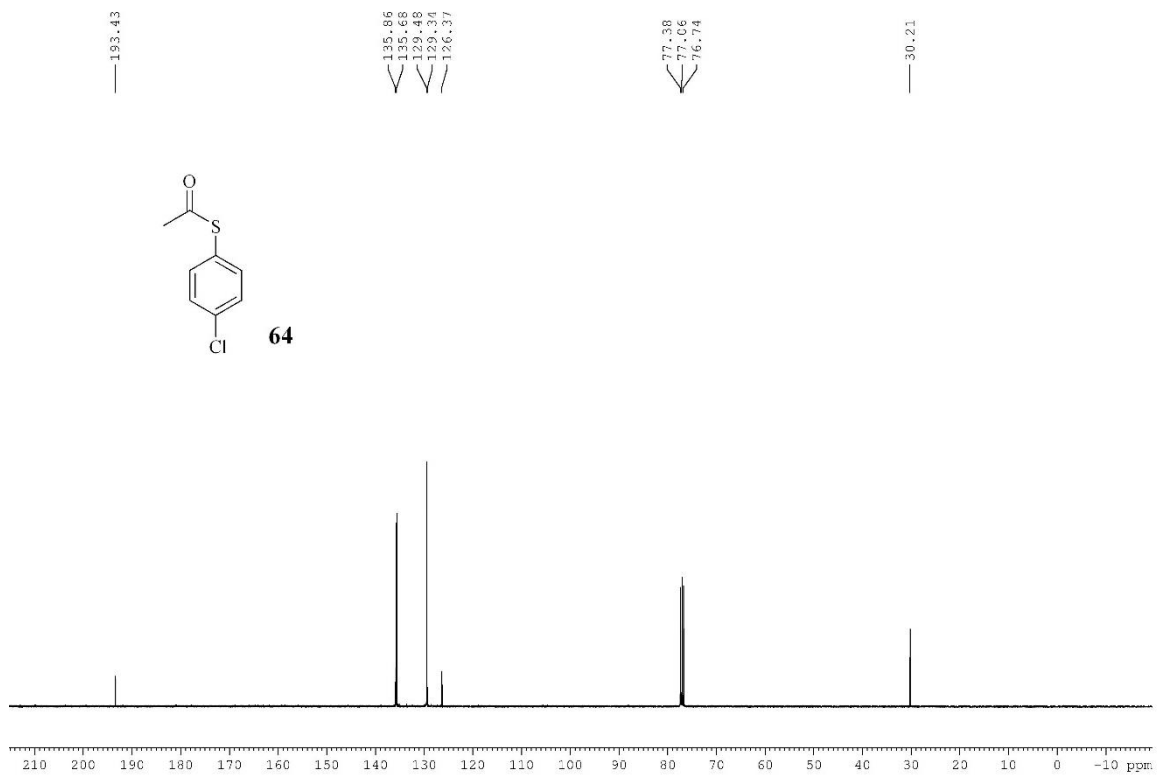

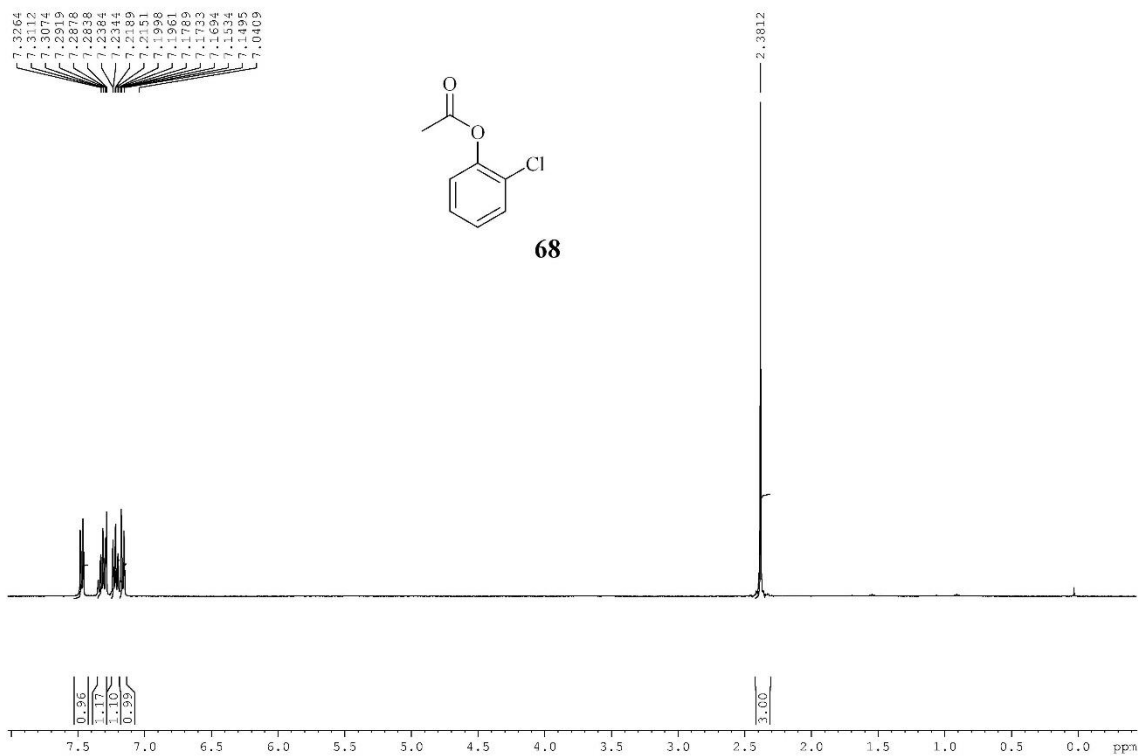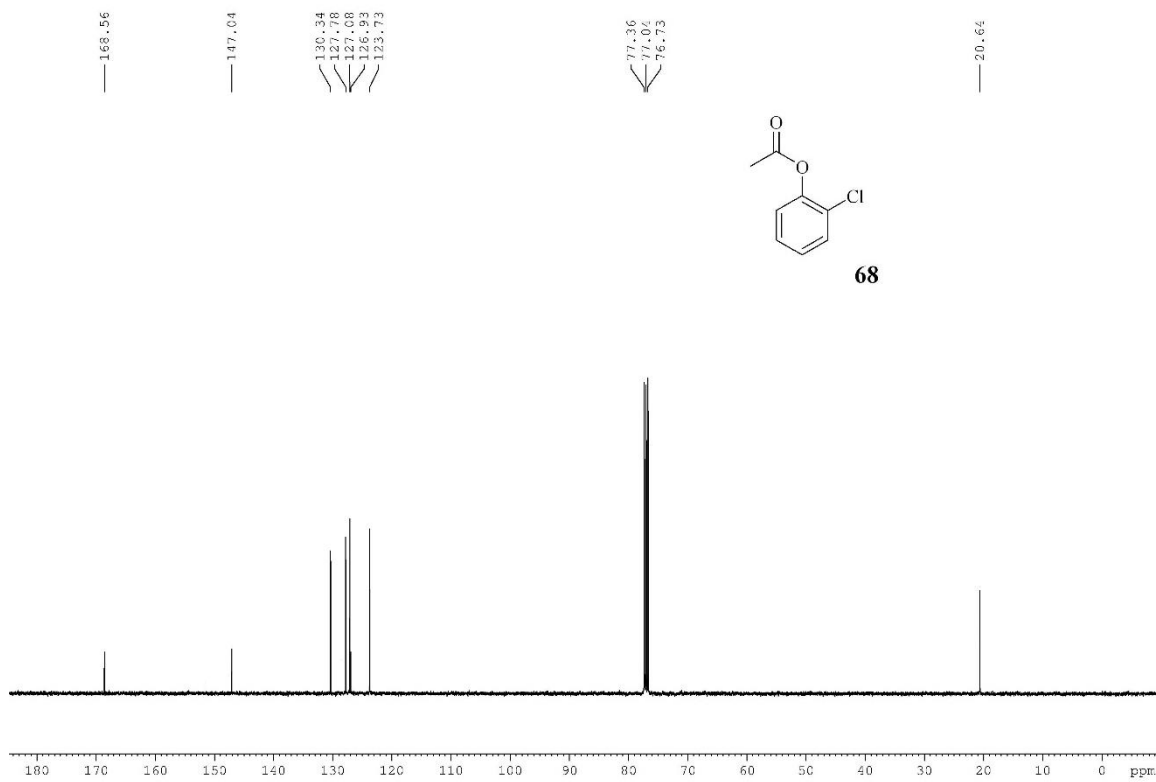

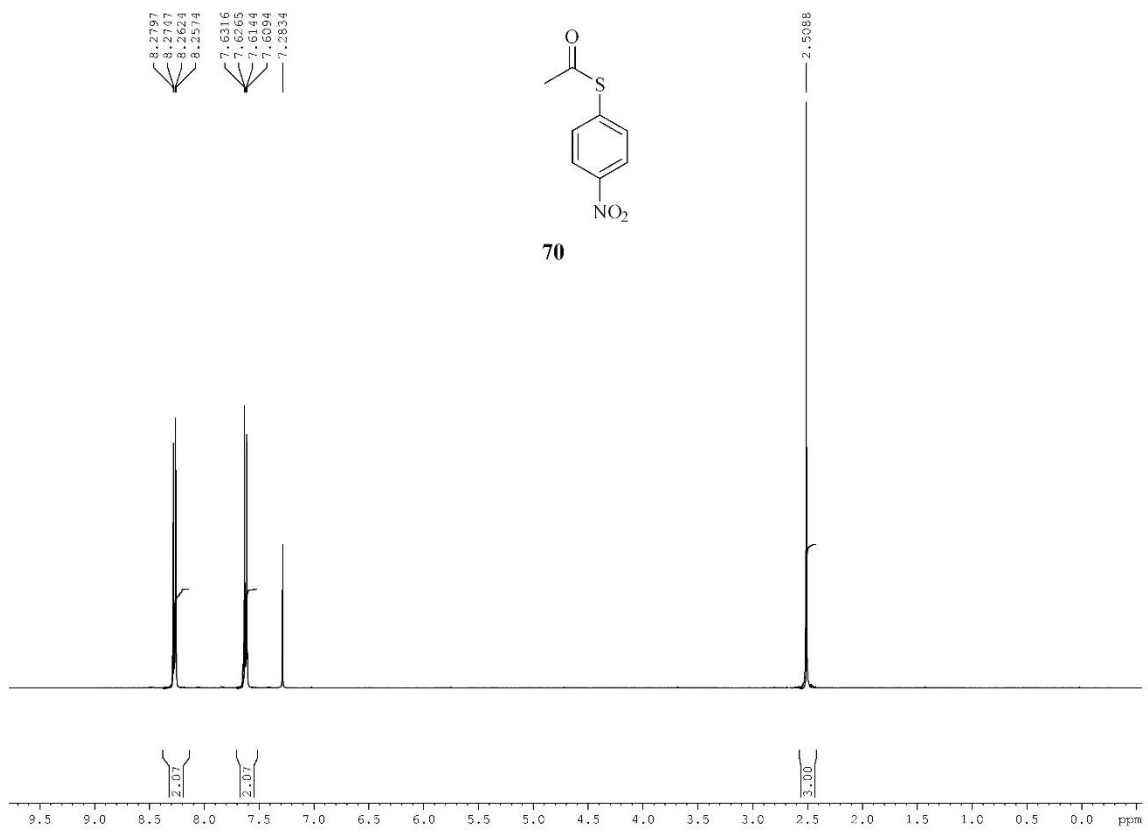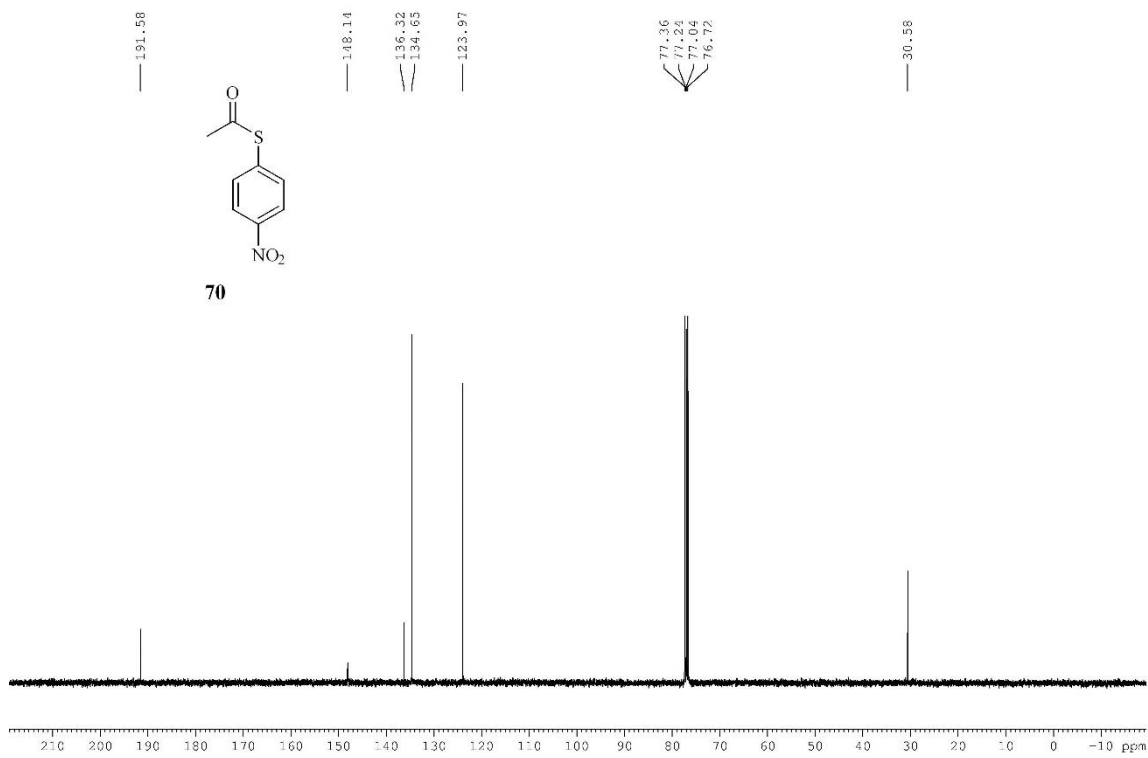

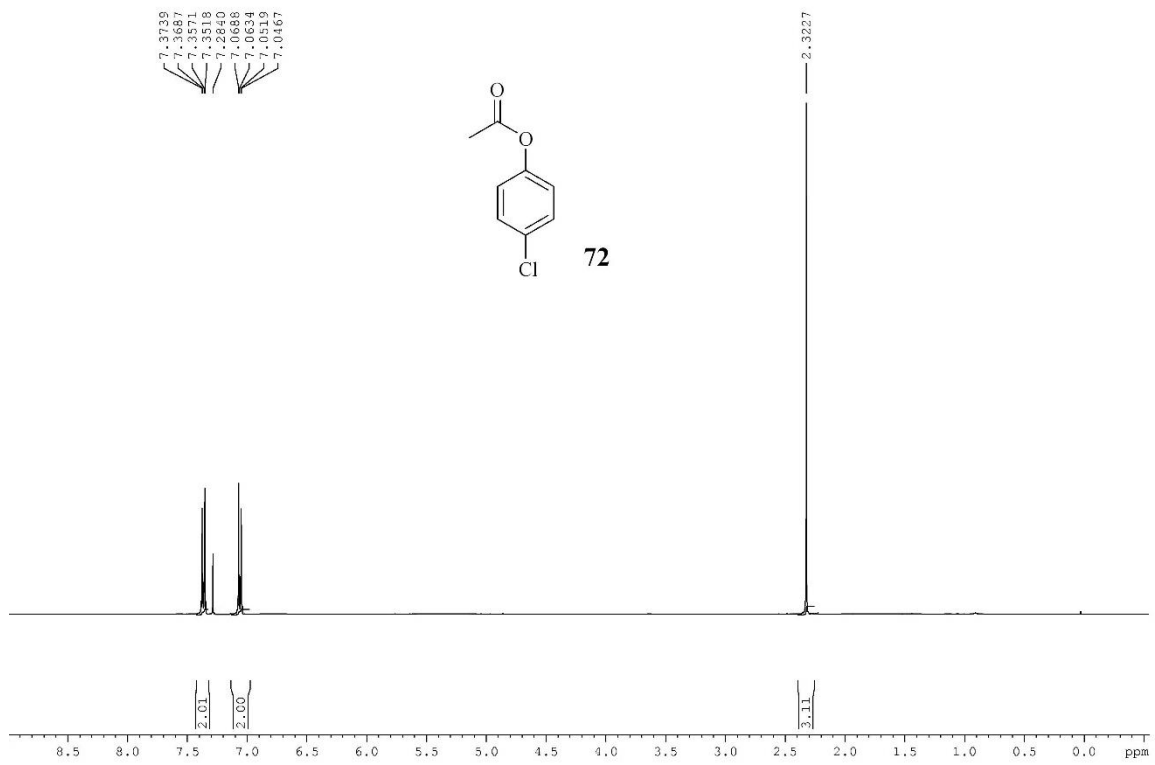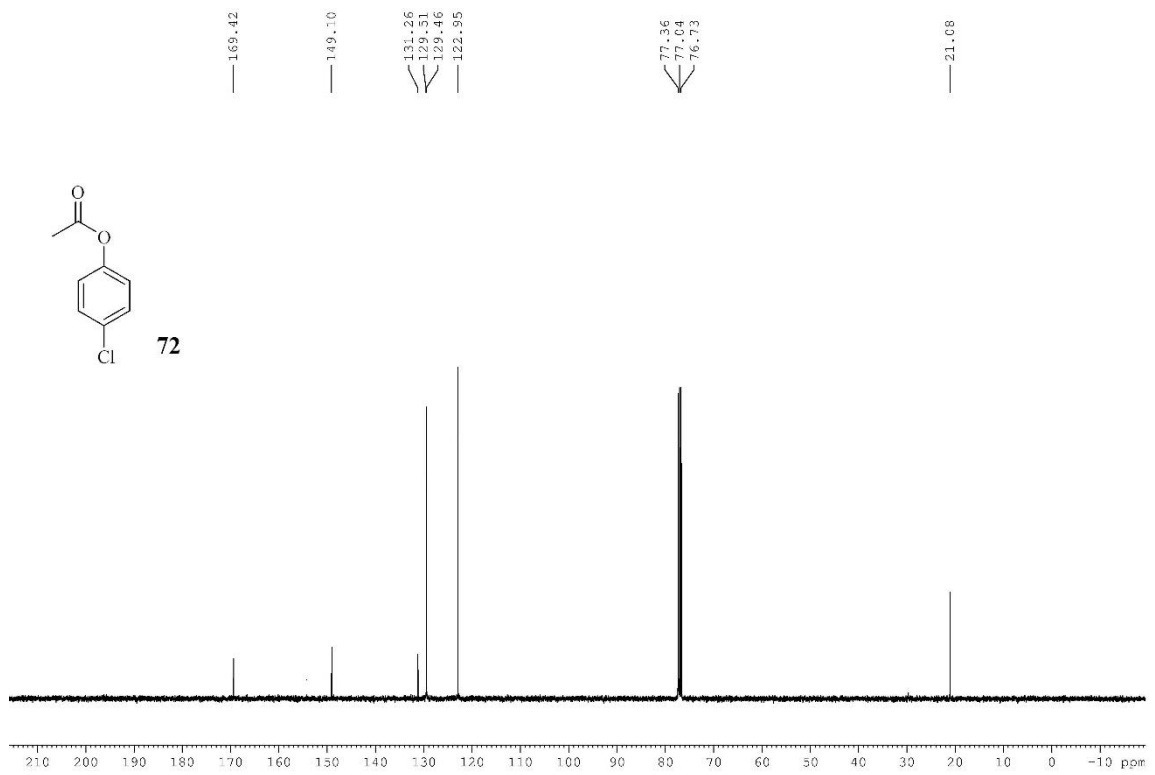

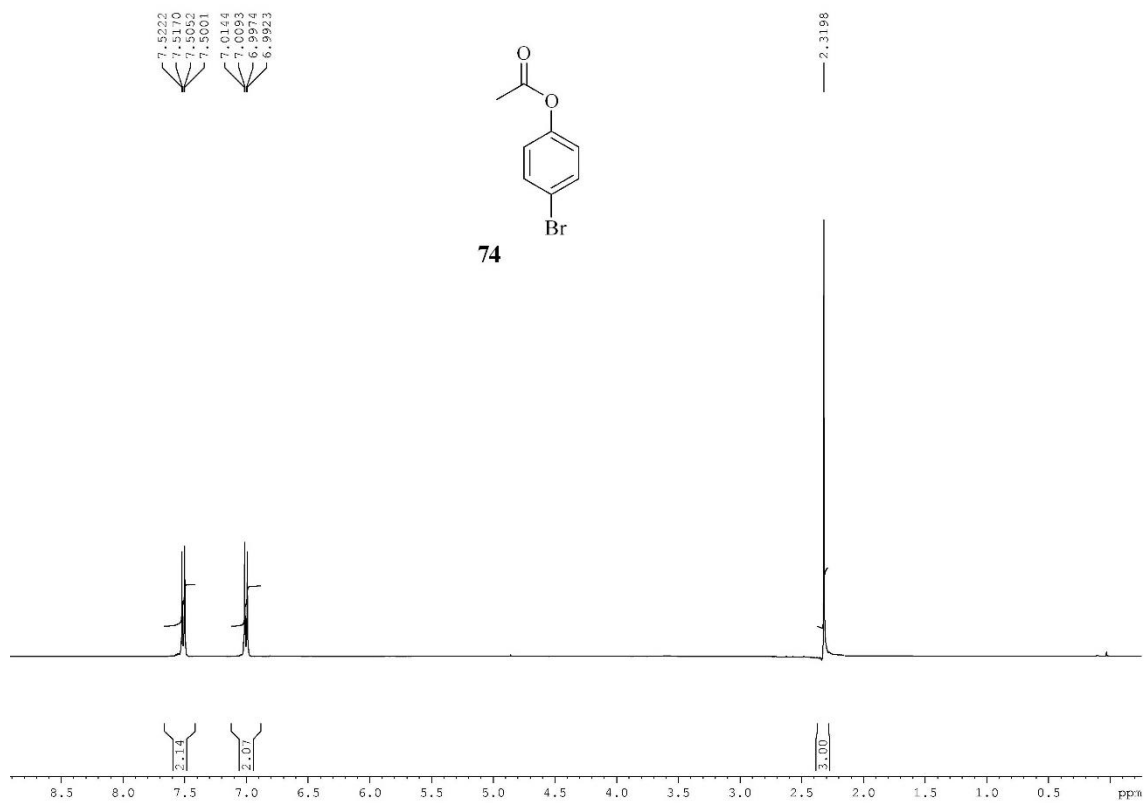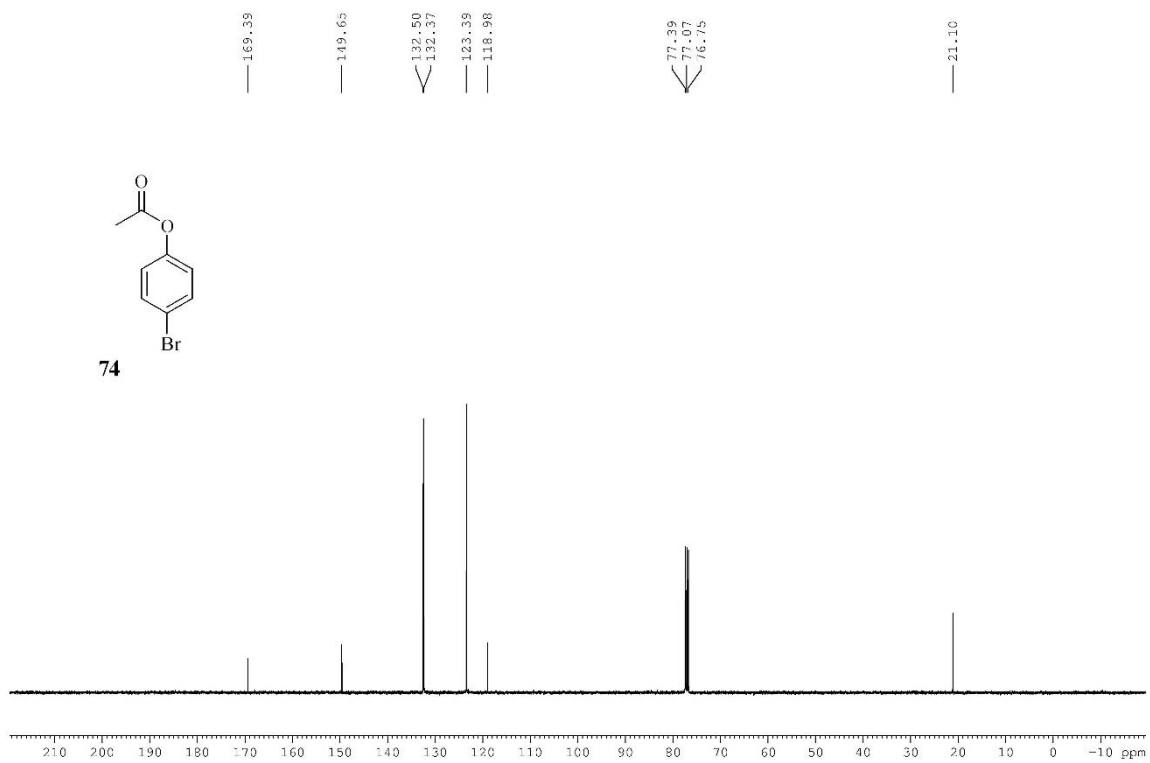



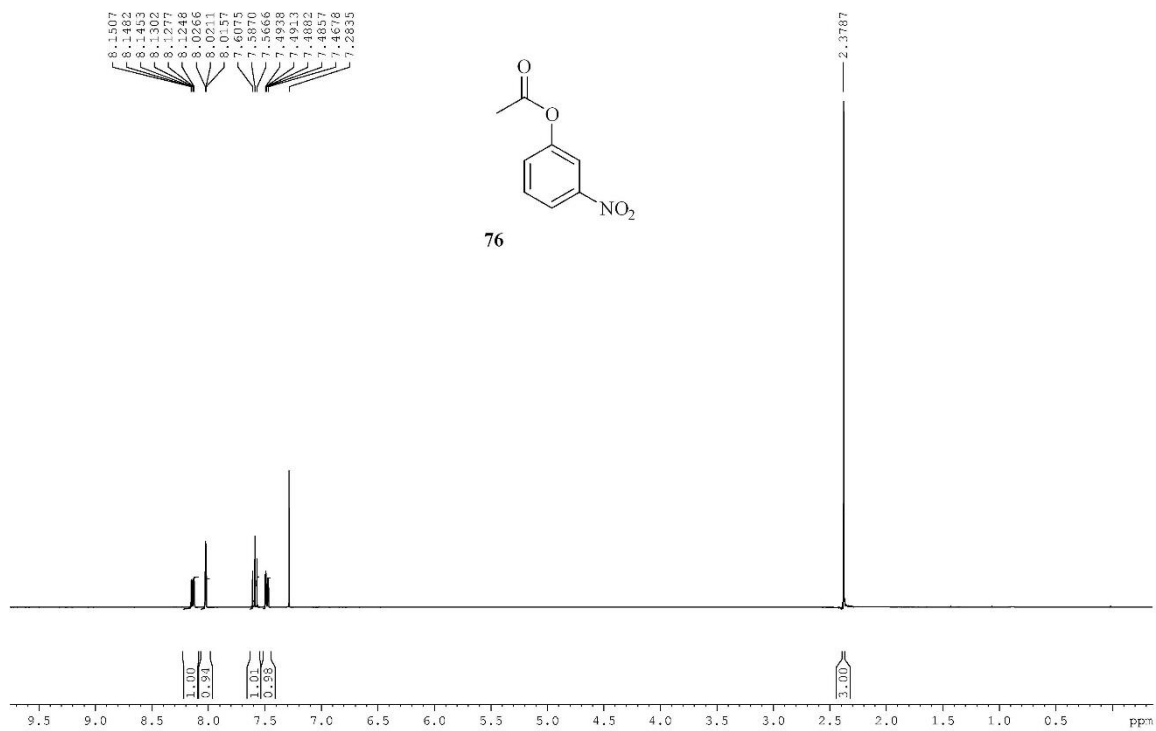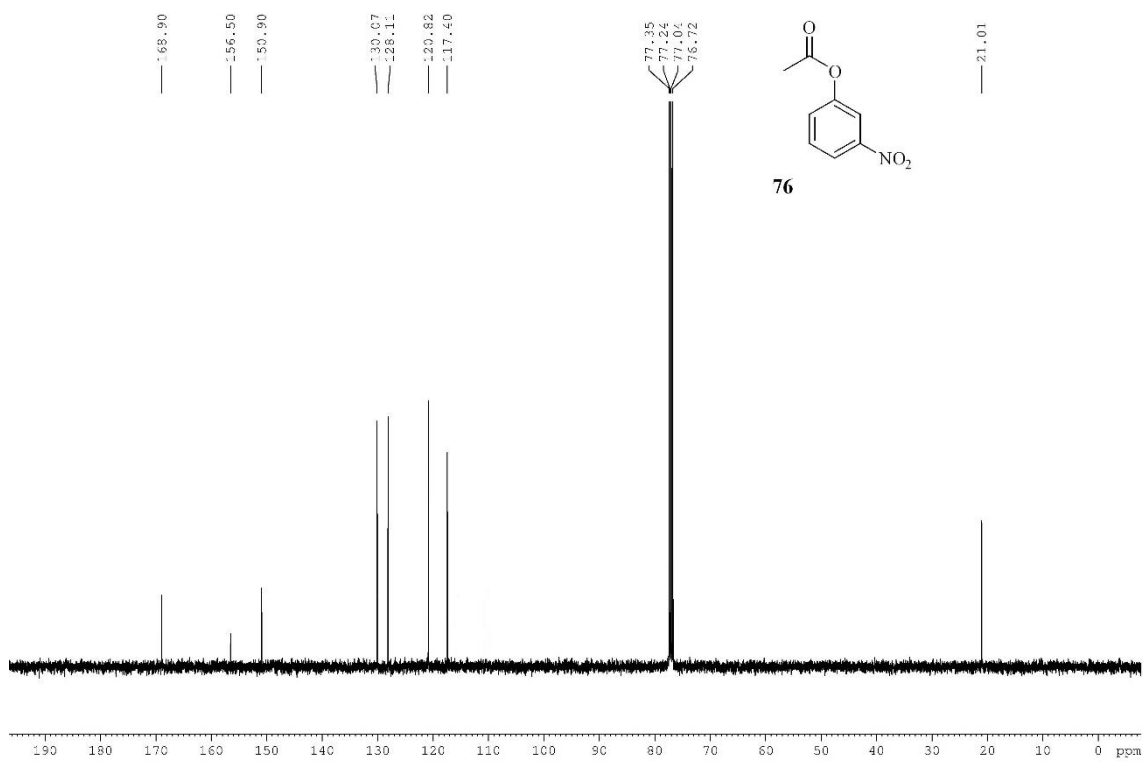

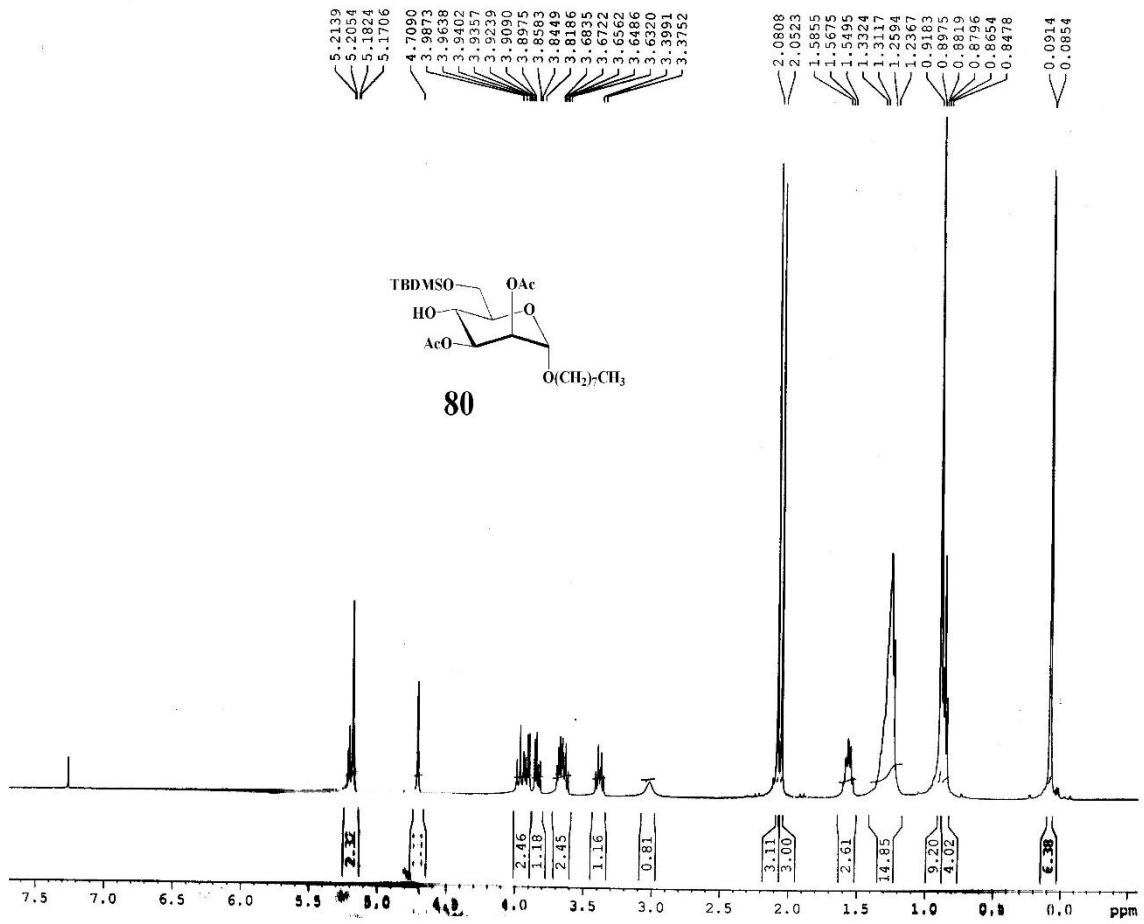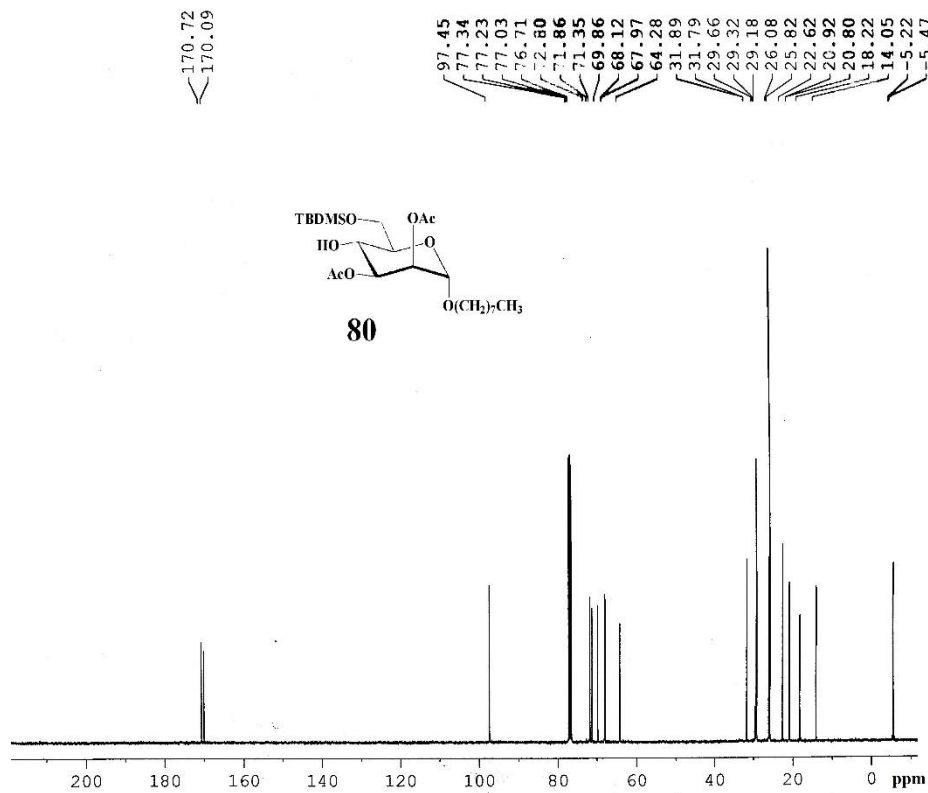

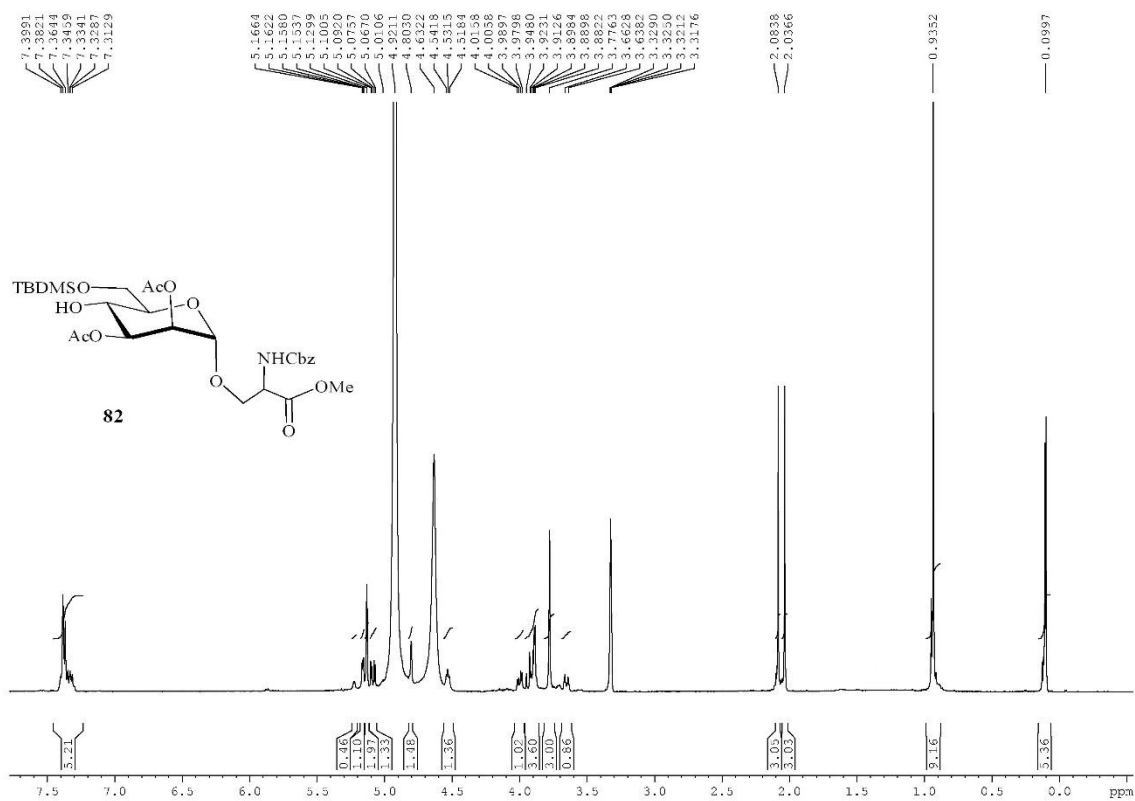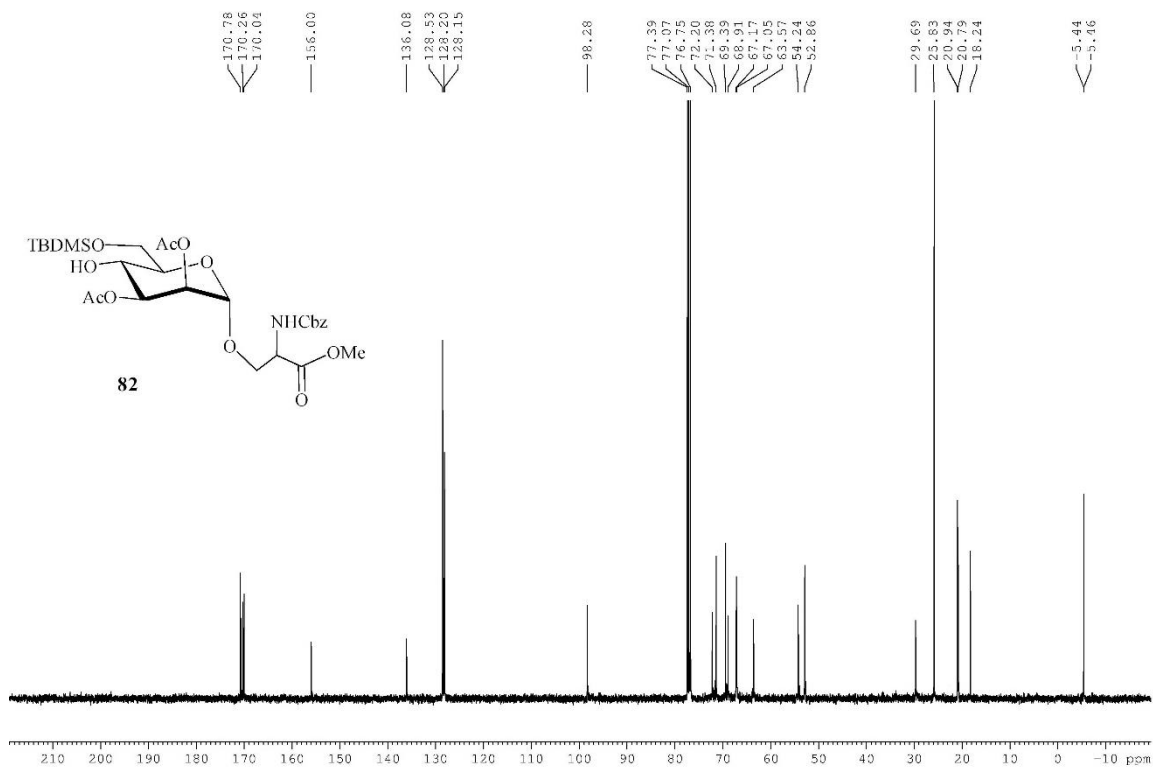

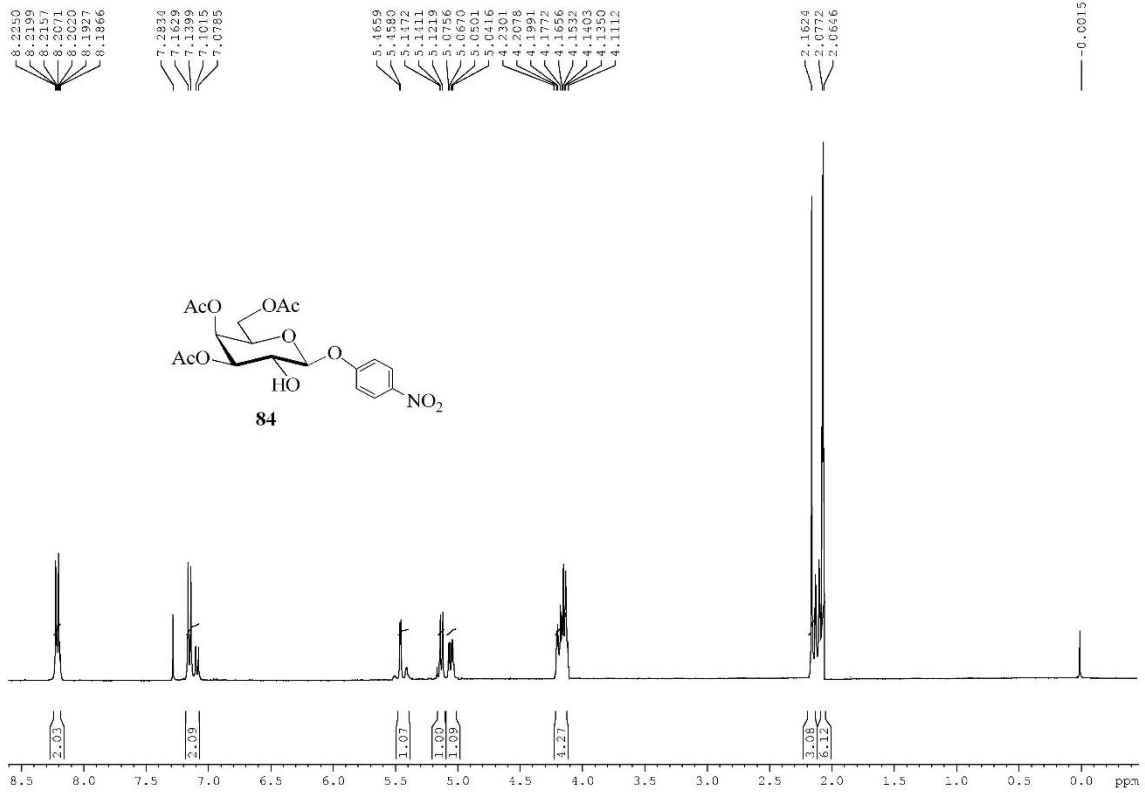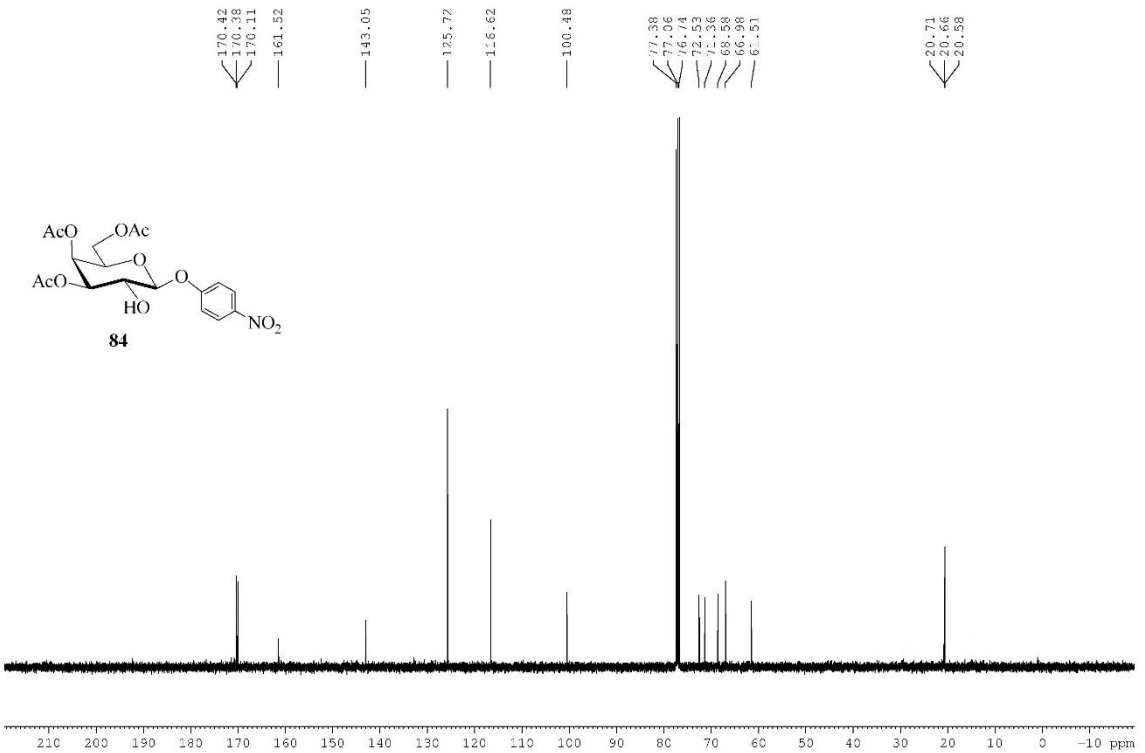

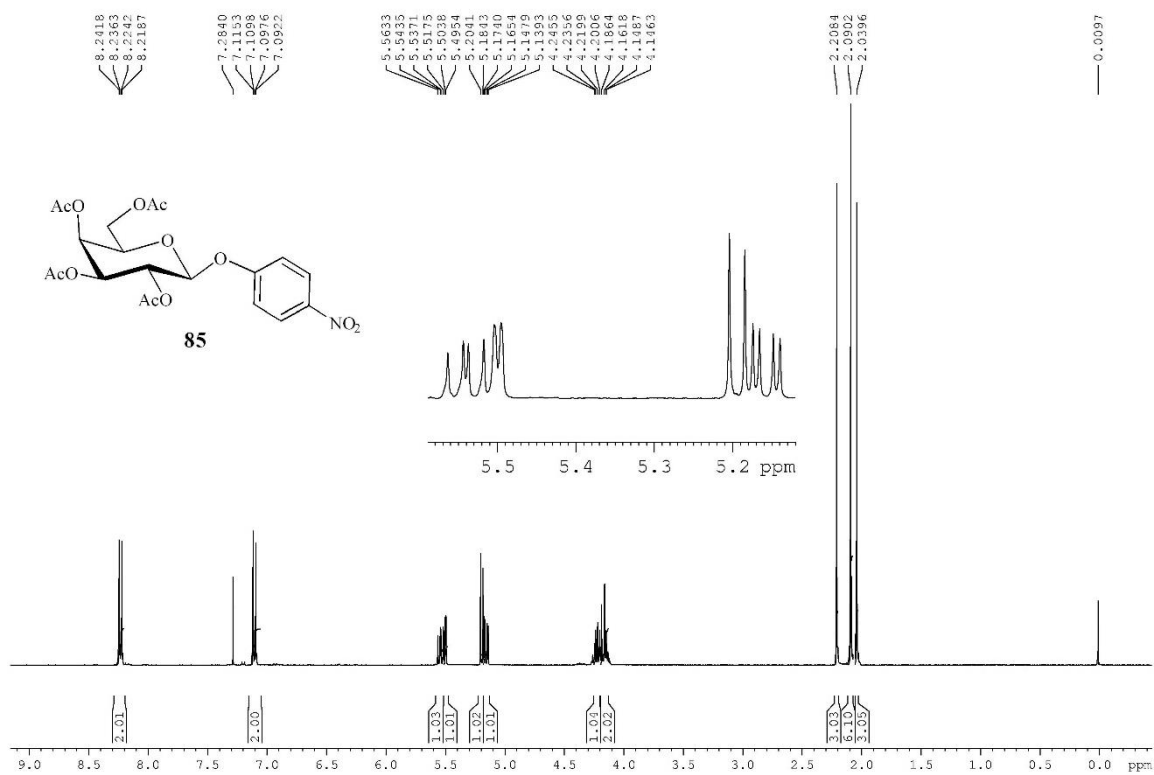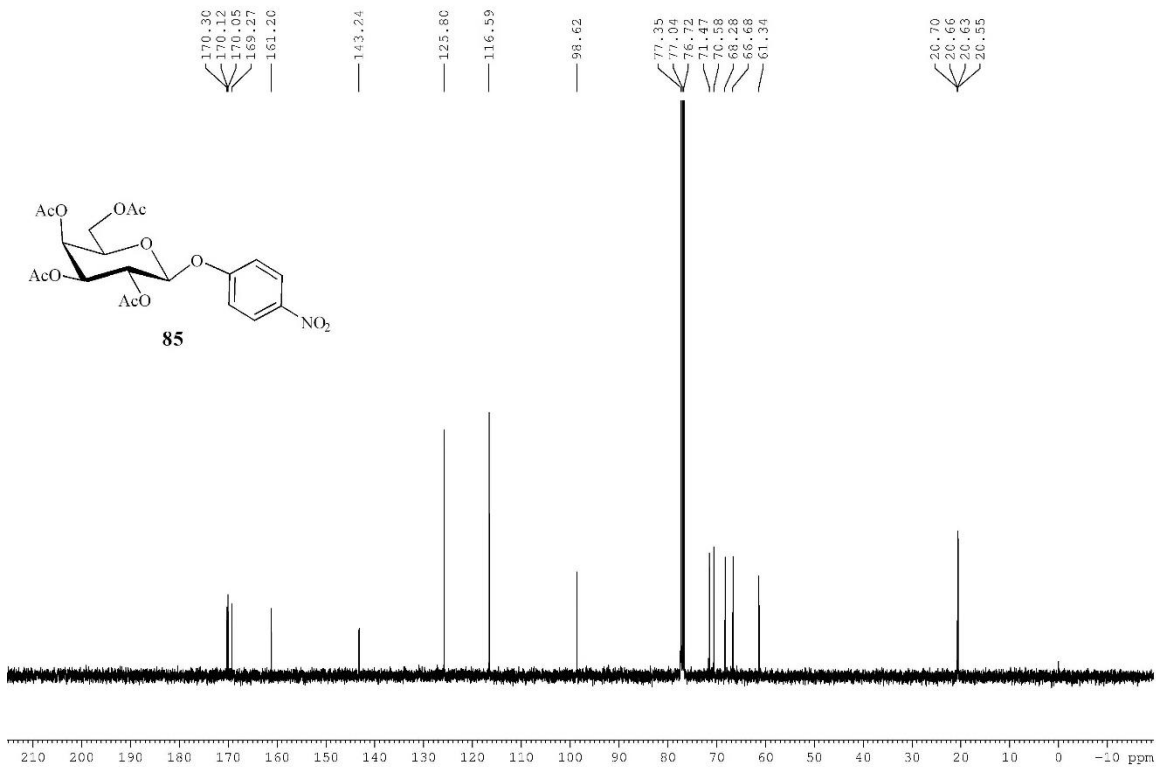

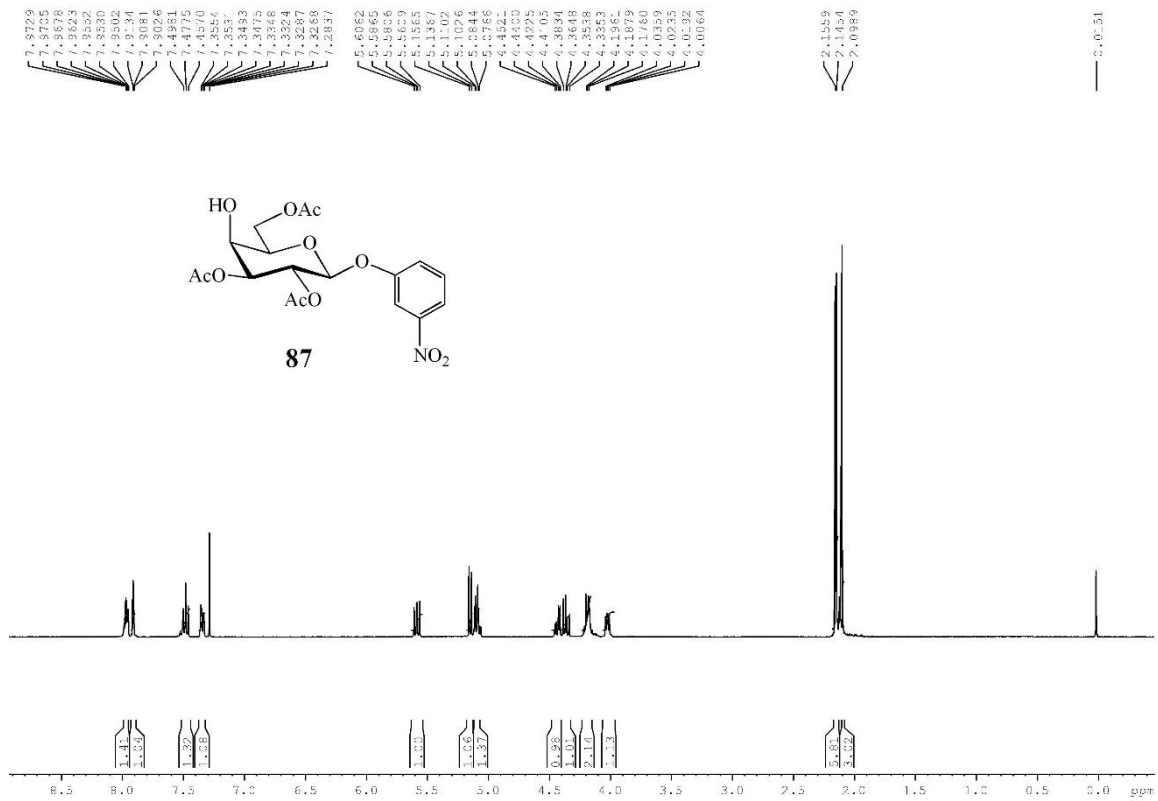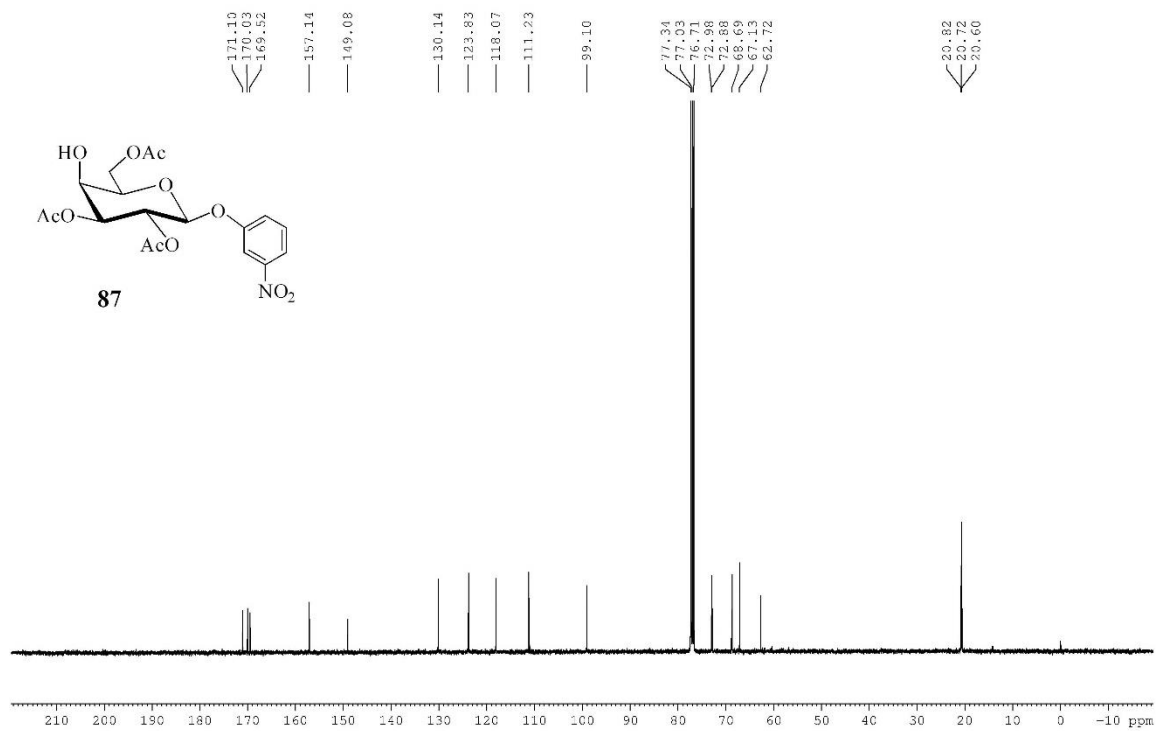

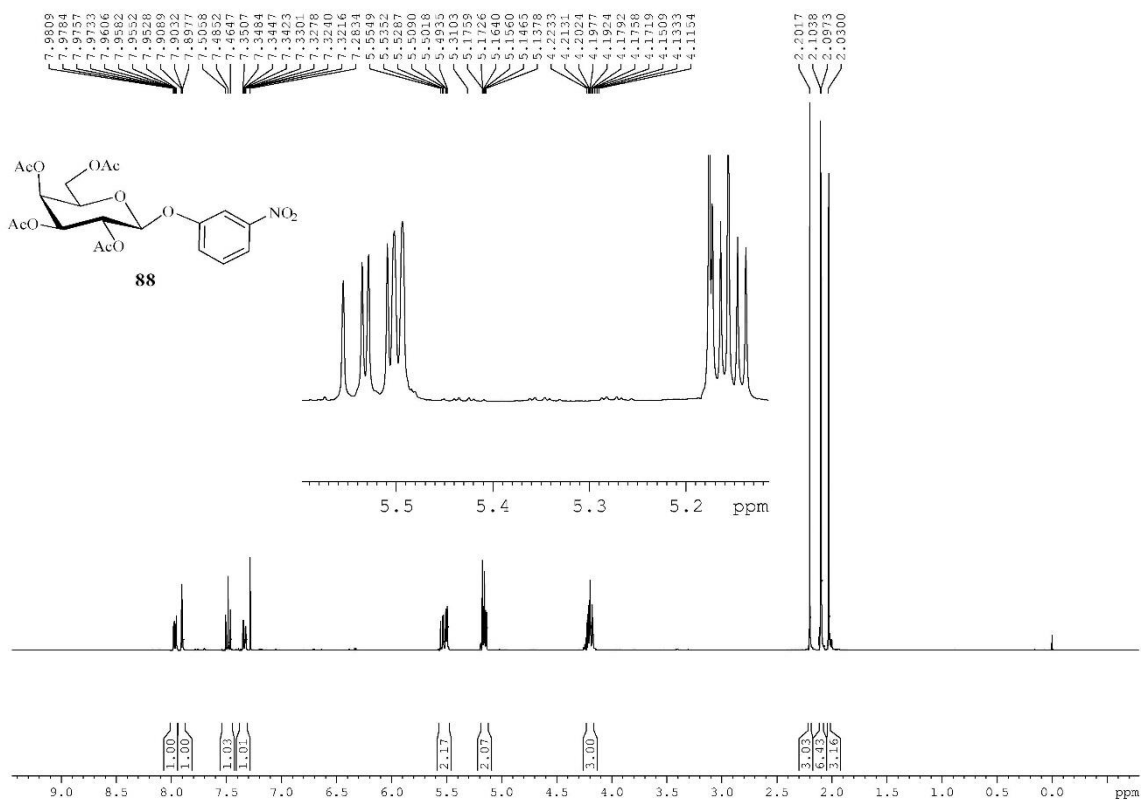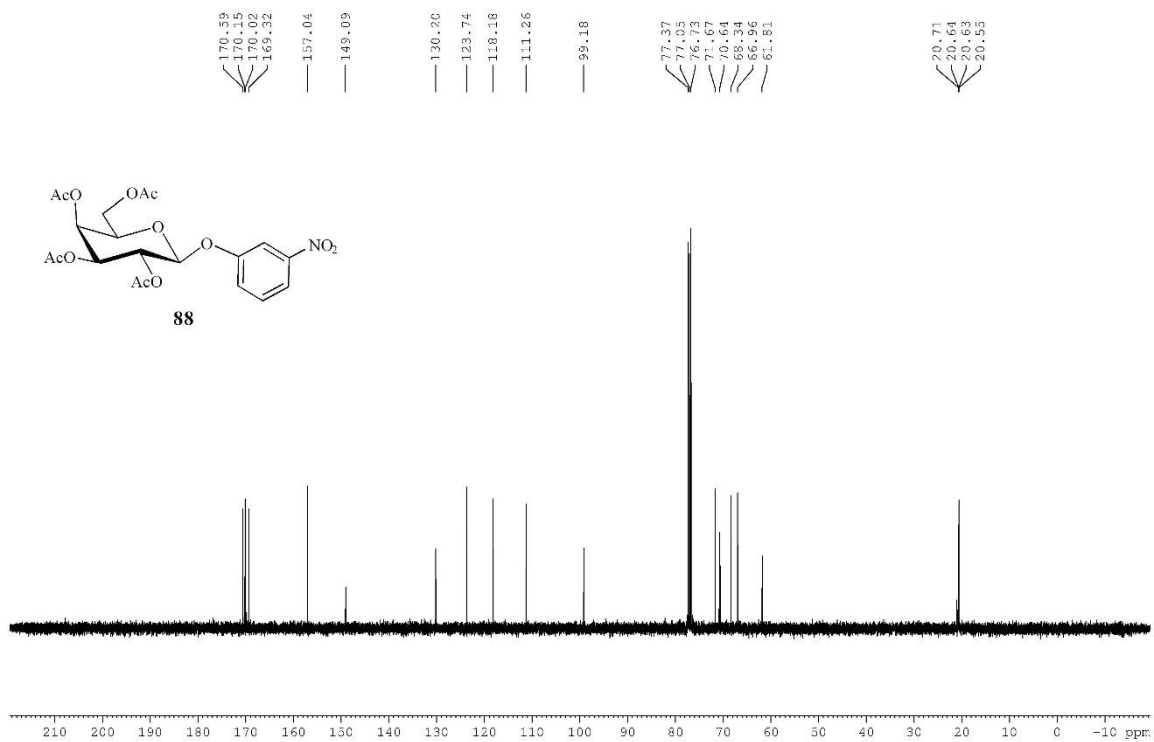

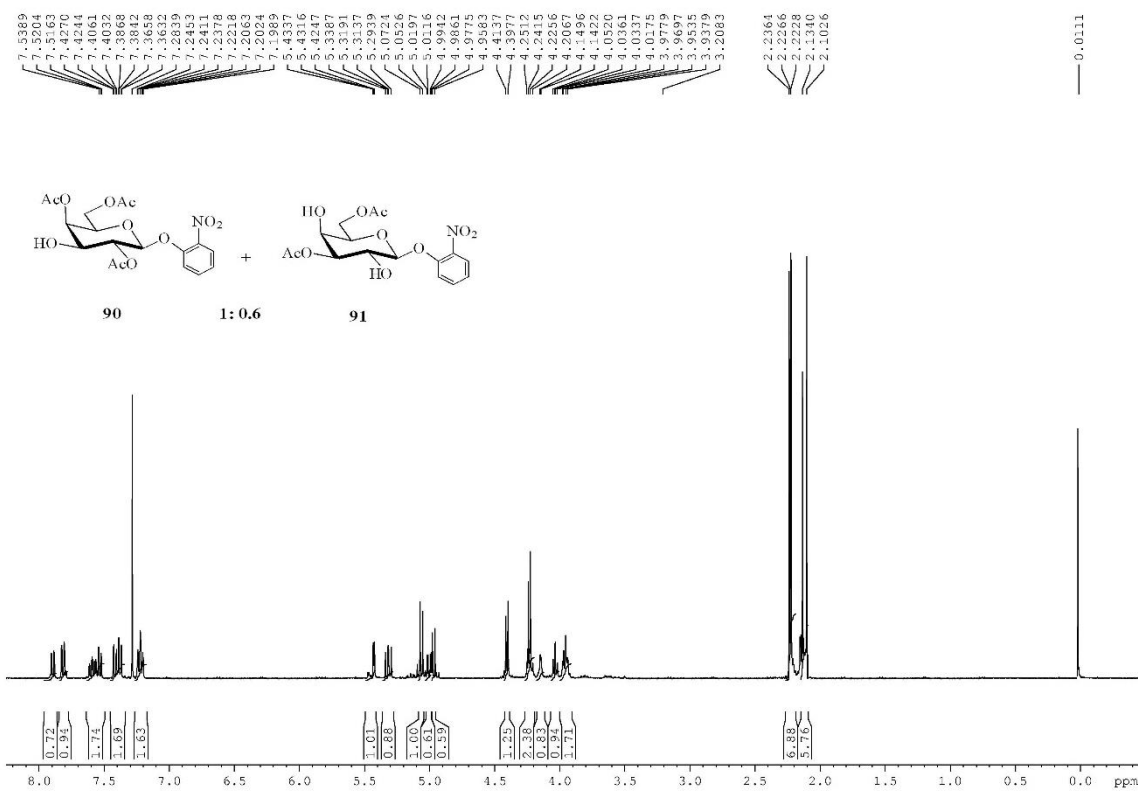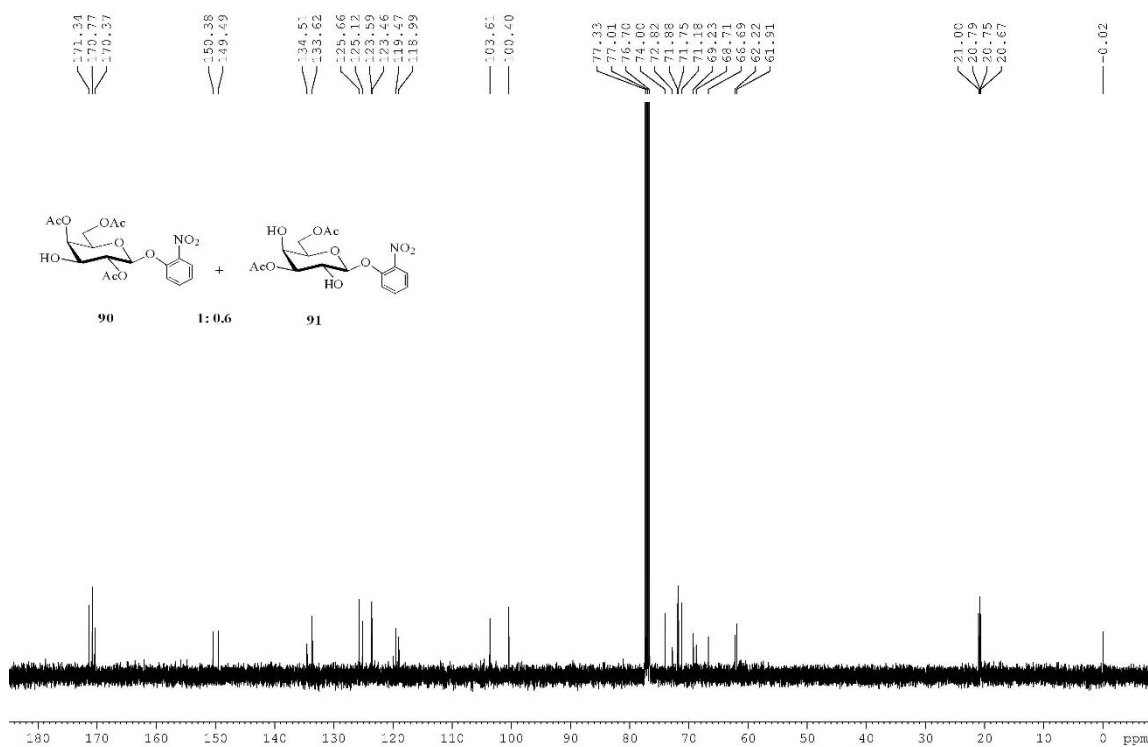





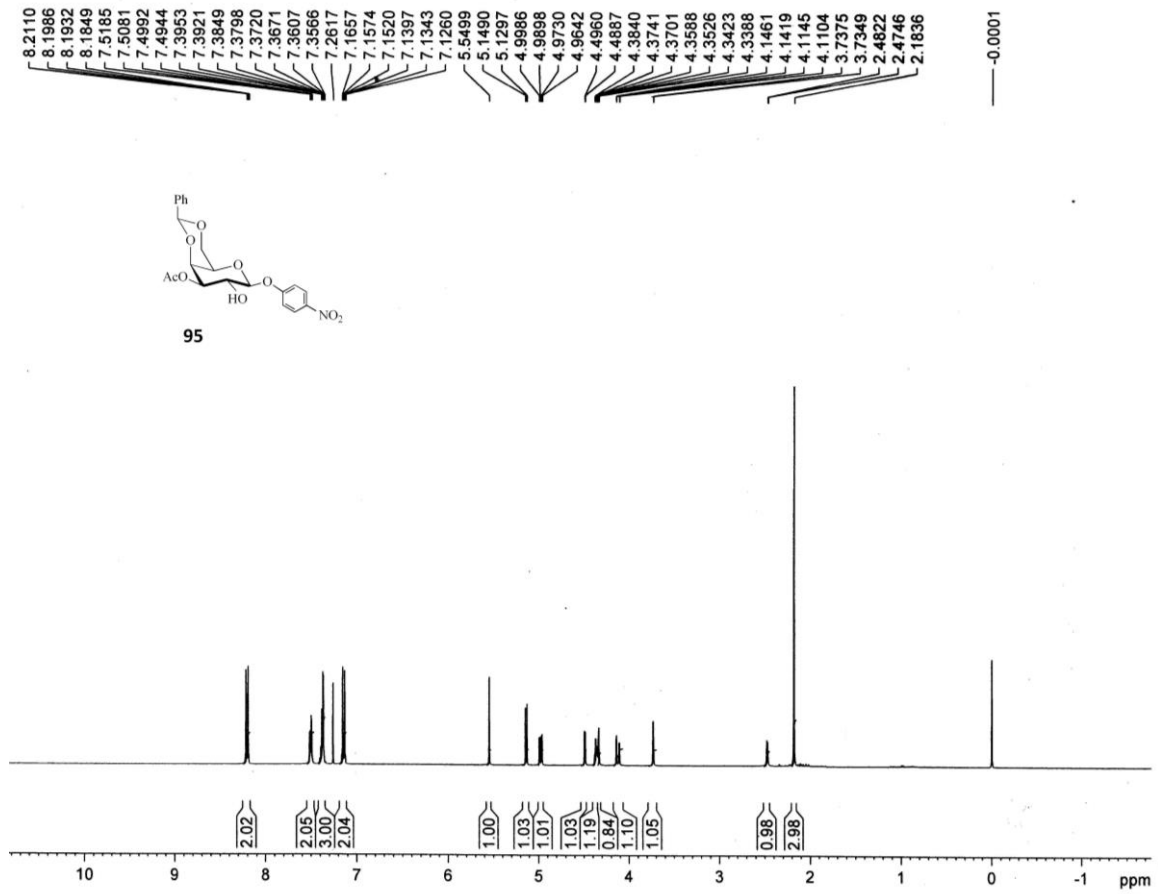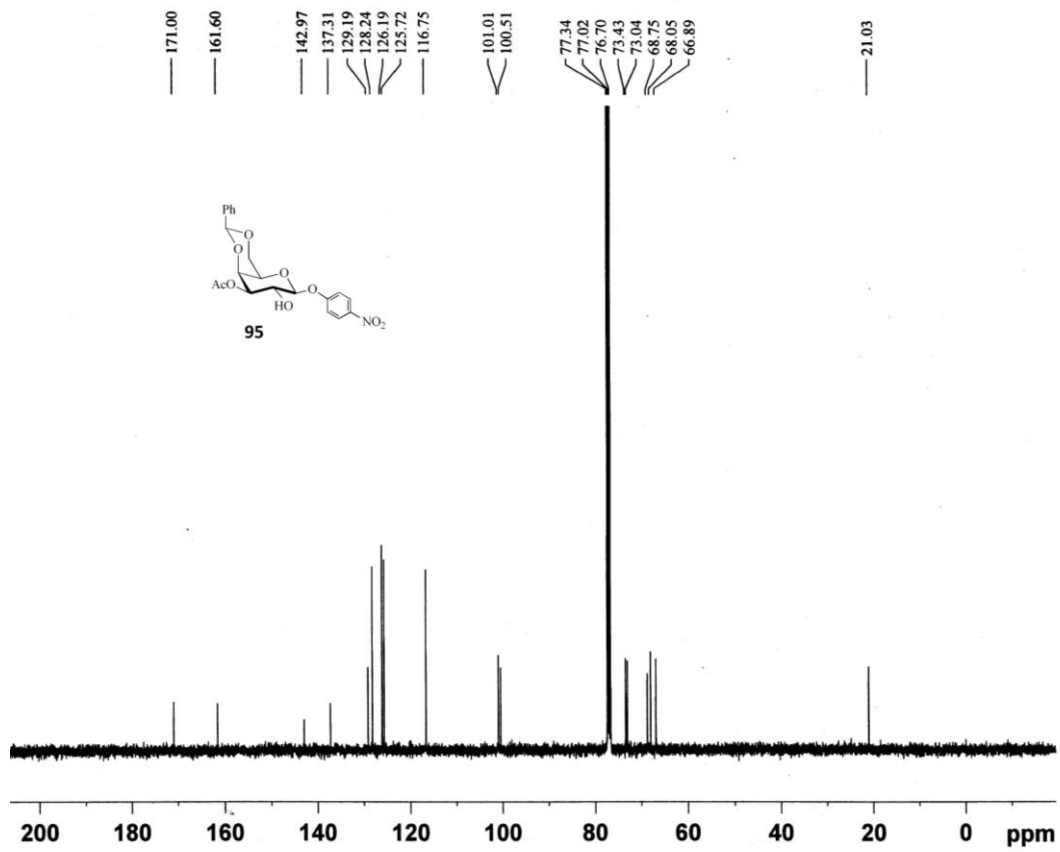

8.1867  
8.1813  
8.1730  
7.5400  
7.5332  
7.5292  
7.5207  
7.5160  
7.4119  
7.4093  
7.4005  
7.3945  
7.3871  
7.3826  
7.3772  
7.3752  
7.3713  
7.2622  
7.1251  
7.1168  
7.1115  
7.0991  
7.0937  
7.0854  
5.7309  
5.7112  
5.7048  
5.6851  
5.5597  
5.2442  
5.2244  
5.1030  
5.0941  
5.0789  
5.0681  
4.4978  
4.4891  
4.3936  
4.3897  
4.3621  
4.3583  
4.1586  
4.1544  
4.1270  
4.1229  
3.7540  
3.7515  
2.1579  
2.1414  
2.1141  
2.0700  
2.0605  
2.0559

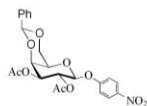

96

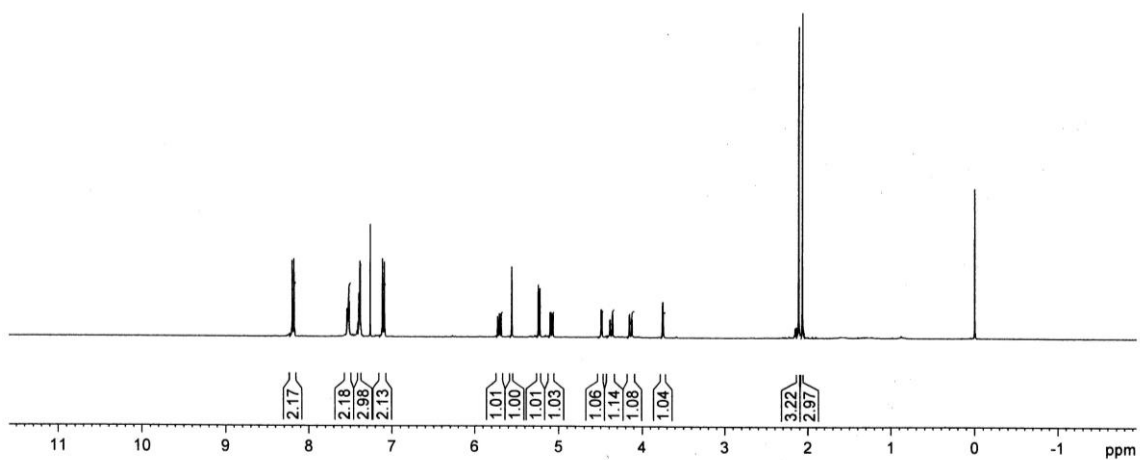

170.70  
169.13  
161.47  
143.02  
137.11  
129.26  
128.26  
126.29  
125.73  
116.77  
101.13  
98.75  
77.33  
77.01  
76.70  
72.97  
71.58  
68.62  
67.99  
66.91  
20.85  
20.72

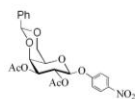

96

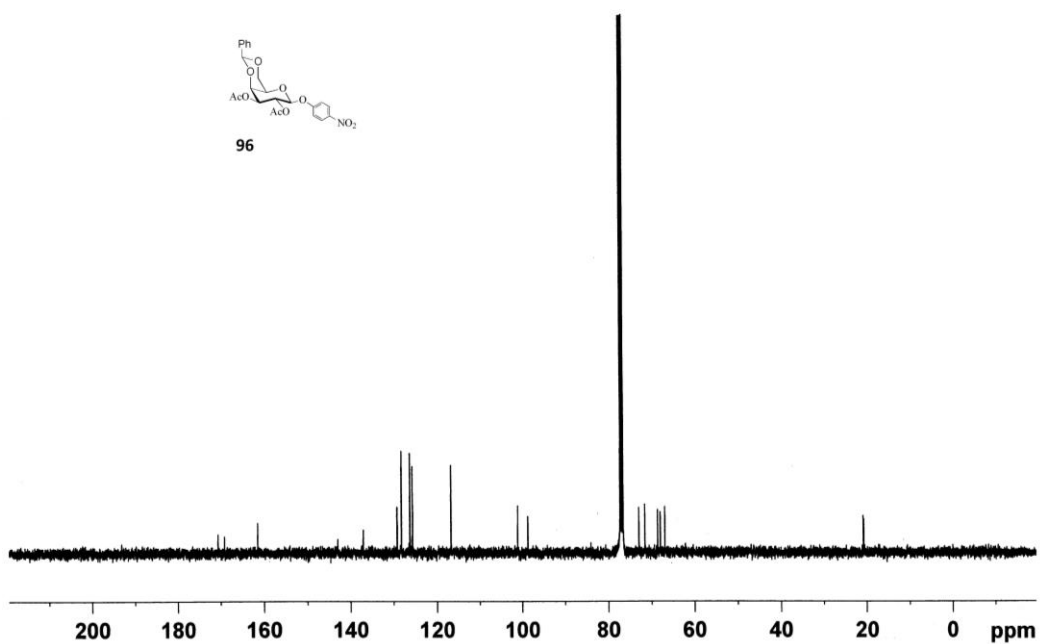

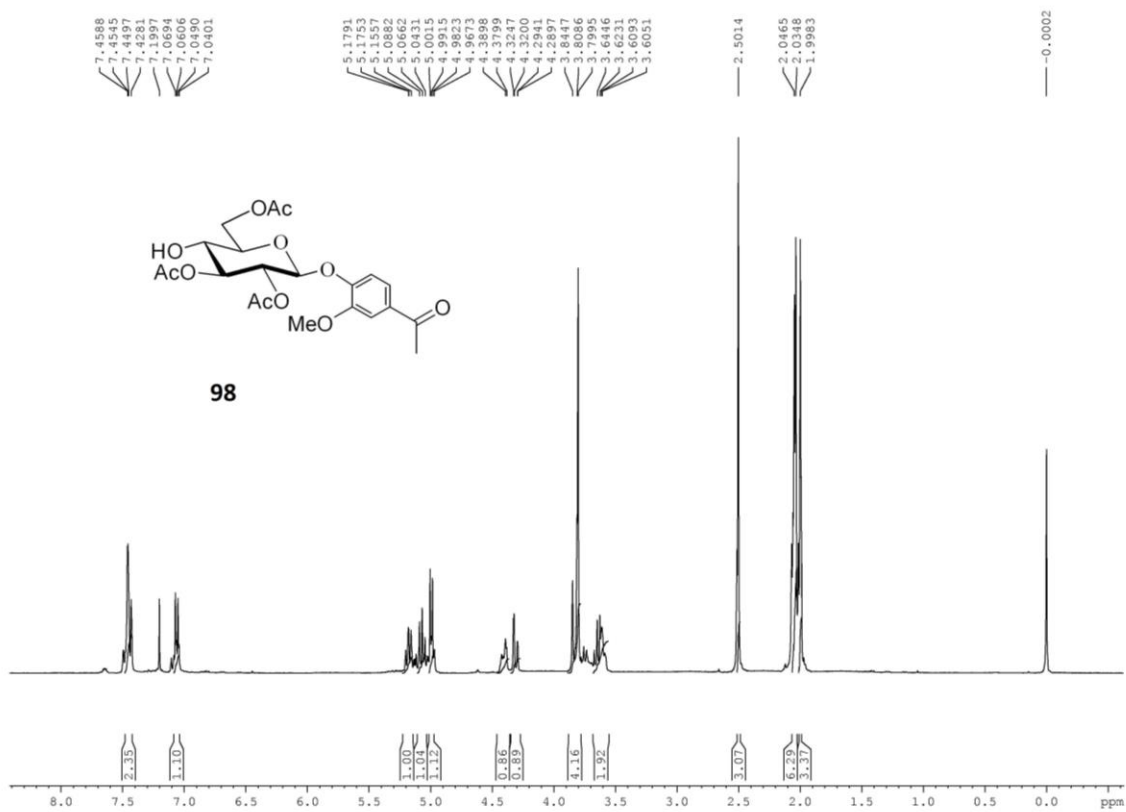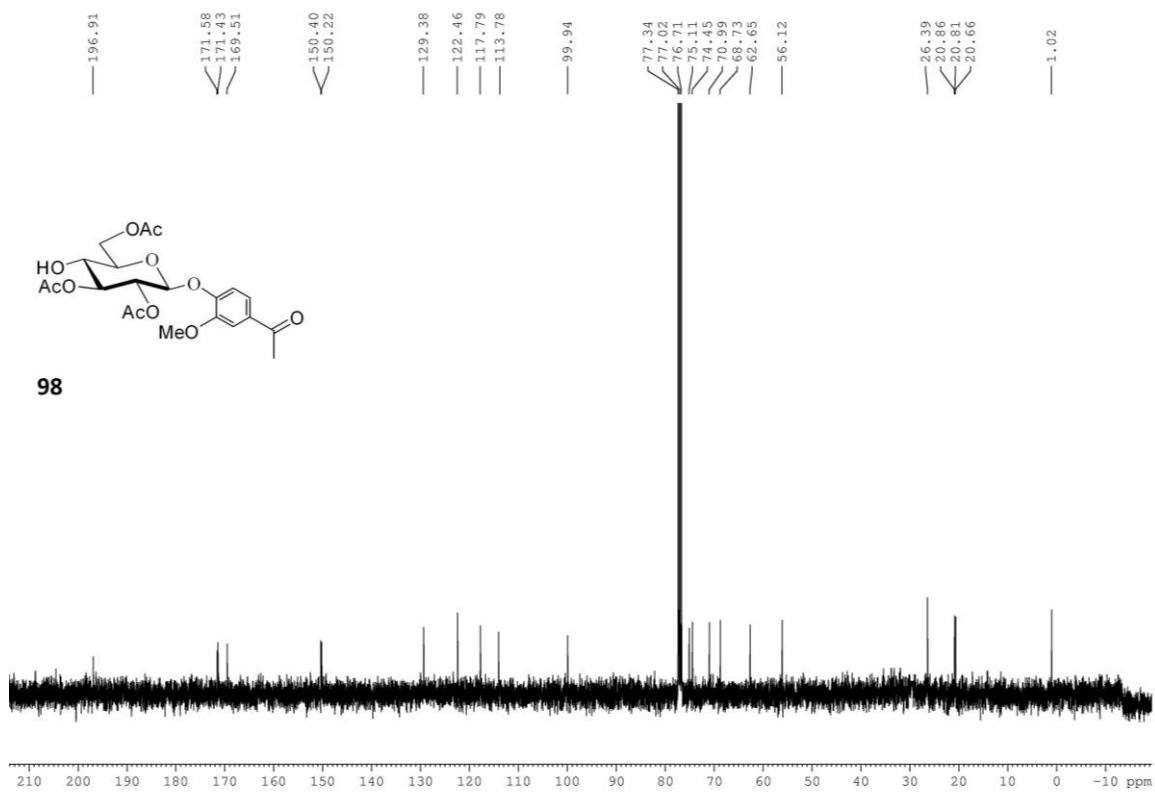

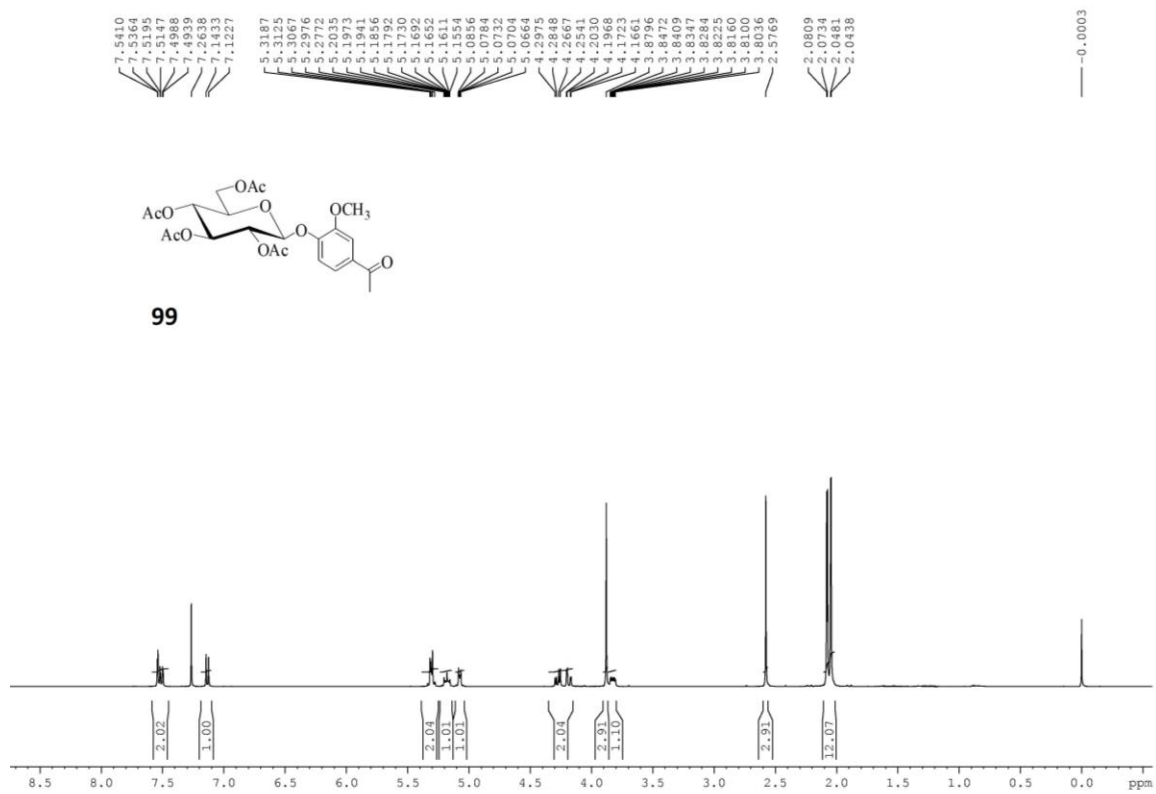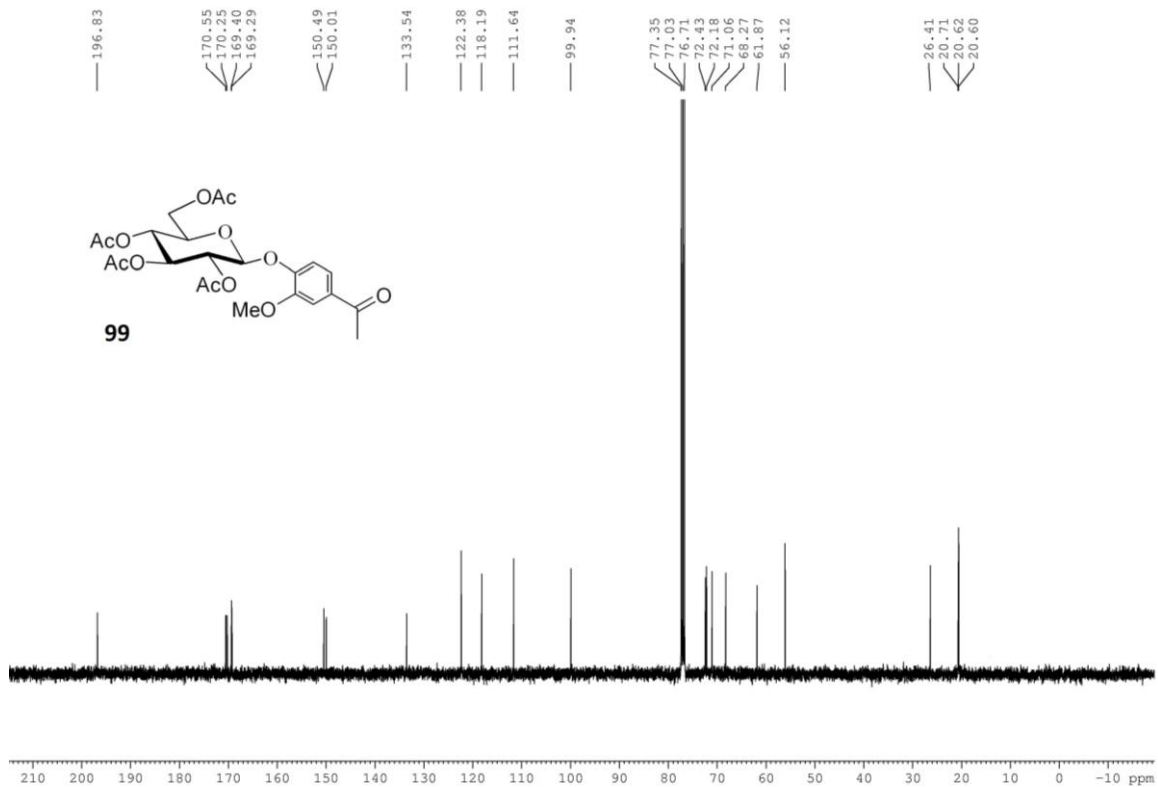

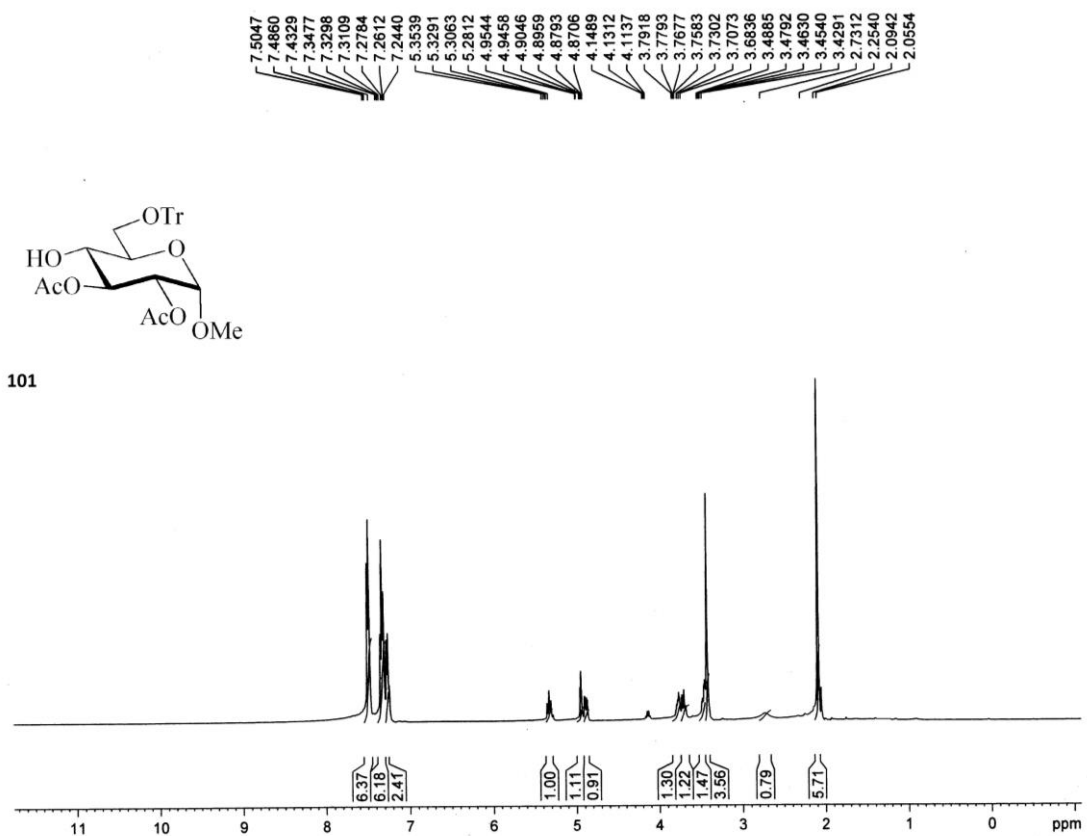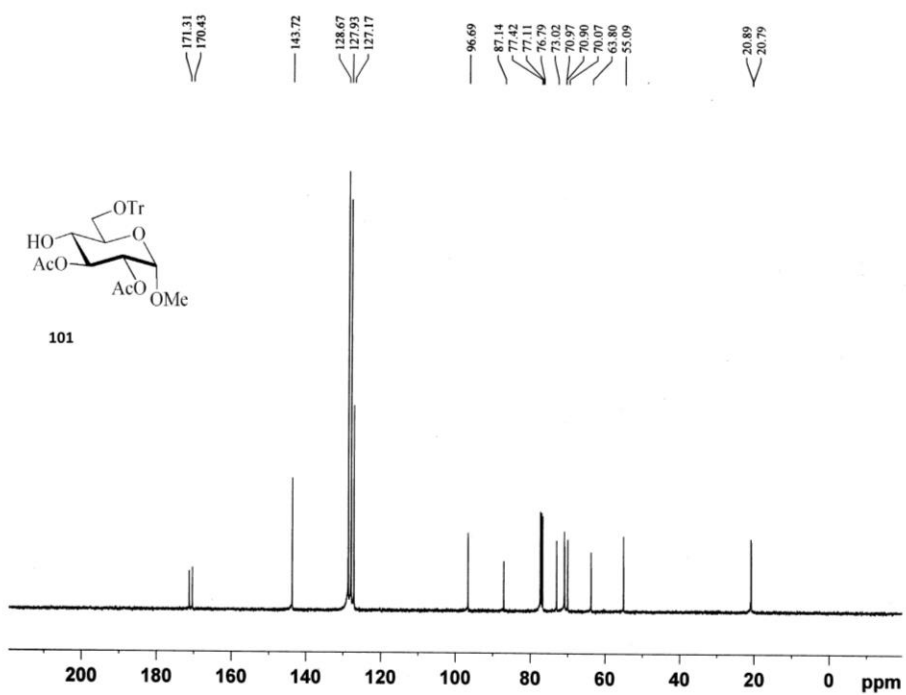

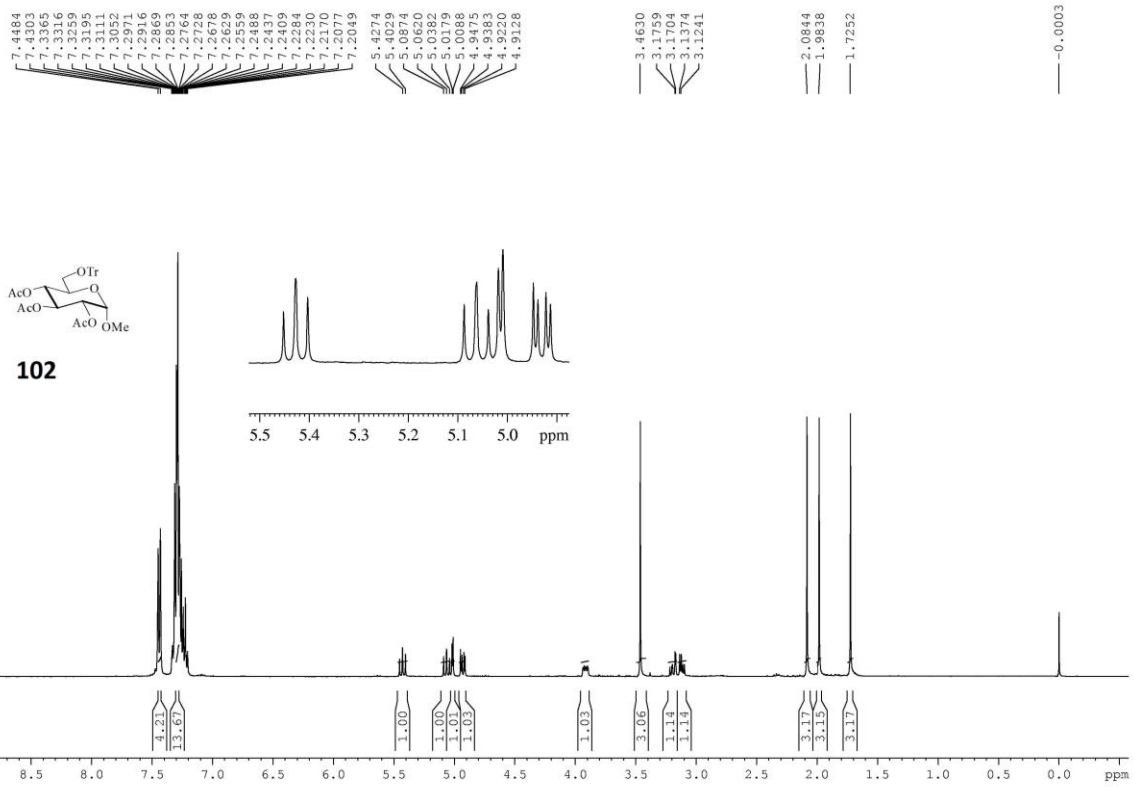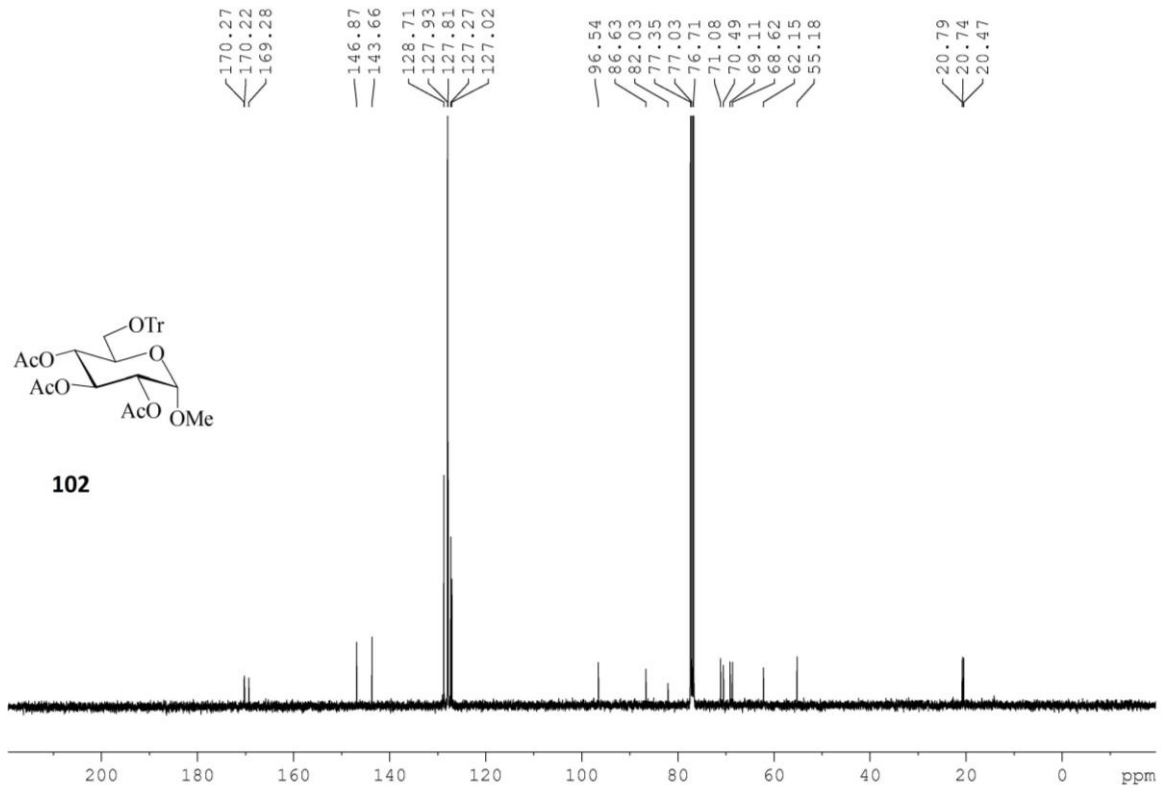

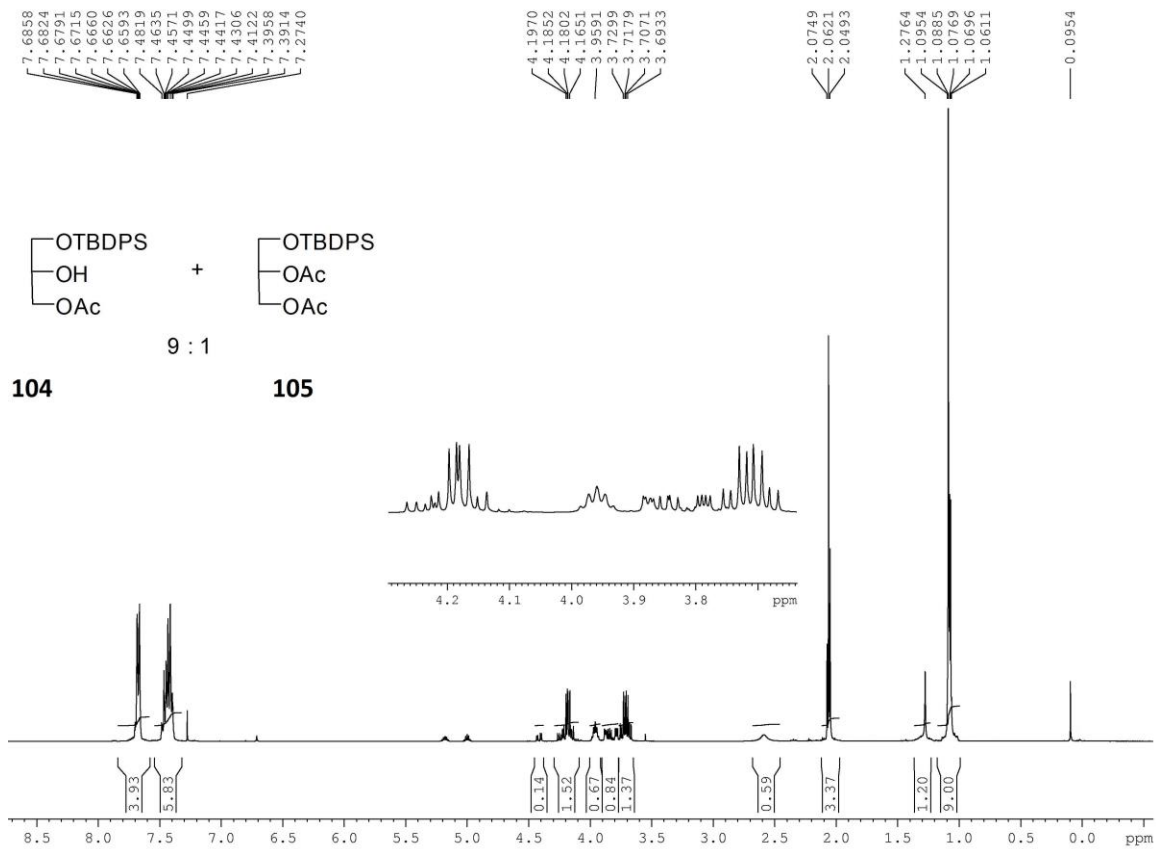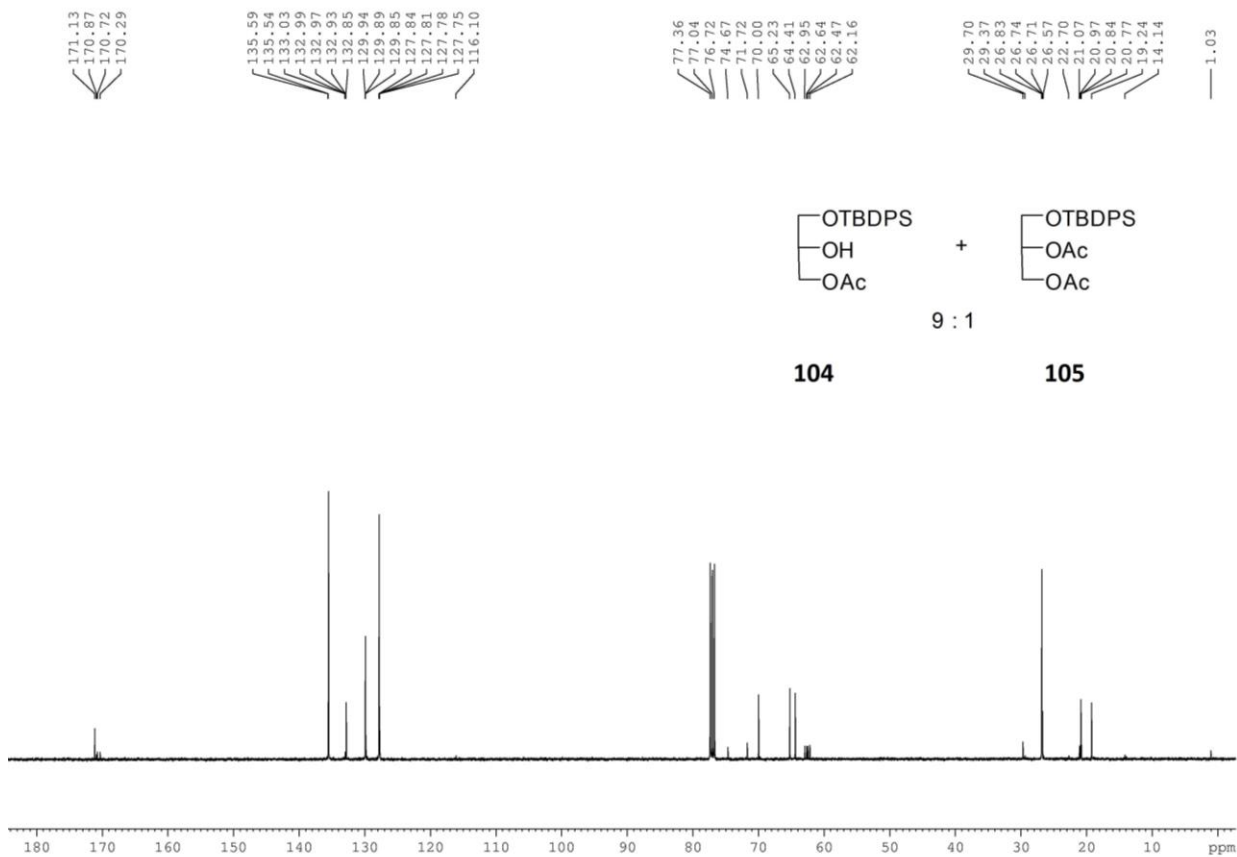



## 2. Computational Details

### 2.1. Cartesian coordinates of compounds Ac<sub>2</sub>O, MeSO<sub>3</sub>H, 2, 2b, 2d optimized at B3LYP/6-31+G(d) in gas phase

Ac<sub>2</sub>O

|     |             |             |             |
|-----|-------------|-------------|-------------|
| 0 1 |             |             |             |
| C   | 2.35011300  | -0.74812100 | 0.34850900  |
| H   | 2.27763400  | -0.83023200 | 1.43942500  |
| H   | 3.29620500  | -0.27760900 | 0.07692100  |
| H   | 2.29917200  | -1.76258600 | -0.06012300 |
| C   | 1.20701200  | 0.08343800  | -0.16611000 |
| O   | -0.00002200 | -0.60228600 | -0.00009000 |
| C   | -1.20699400 | 0.08344400  | 0.16609400  |
| C   | -2.35018500 | -0.74801800 | -0.34848100 |
| H   | -2.29927000 | -1.76250600 | 0.06010200  |
| H   | -3.29623100 | -0.27746900 | -0.07679800 |
| H   | -2.27779000 | -0.83008200 | -1.43940500 |
| O   | 1.27749500  | 1.15843500  | -0.69519200 |
| O   | -1.27739800 | 1.15835300  | 0.69525700  |

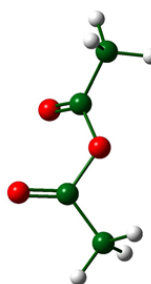

MeSO<sub>3</sub>H

|     |             |             |             |
|-----|-------------|-------------|-------------|
| 0 1 |             |             |             |
| S   | -0.09003200 | 0.15220000  | 0.04696200  |
| O   | -0.72163300 | -1.15390600 | -0.74764000 |
| O   | -0.65045100 | 0.13562200  | 1.40065600  |
| O   | -0.22695900 | 1.32042700  | -0.81213000 |
| C   | 1.63611600  | -0.34625200 | 0.07929700  |
| H   | 2.19168600  | 0.47350500  | 0.54053100  |
| H   | 1.72729500  | -1.25972400 | 0.66855500  |
| H   | 1.96573000  | -0.50150900 | -0.94953100 |
| H   | -1.46855300 | -1.48710300 | -0.21381400 |

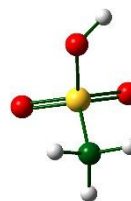

2

|     |             |             |             |
|-----|-------------|-------------|-------------|
| 0 1 |             |             |             |
| C   | -1.13945500 | 1.06840400  | 0.05845100  |
| C   | -2.47455600 | 1.07356700  | -0.09979600 |
| C   | -1.02305100 | -1.42297800 | 0.65596100  |
| C   | -2.04106400 | -1.83989700 | -0.40473600 |
| H   | -1.50194500 | -1.30908000 | 1.63229700  |
| H   | -2.15423000 | -2.92719700 | -0.35169600 |

|    |             |             |             |
|----|-------------|-------------|-------------|
| H  | -2.88805000 | 2.06809700  | -0.25501200 |
| H  | -0.21645600 | -2.15557700 | 0.74360300  |
| H  | -1.64751900 | -1.61825300 | -1.40926200 |
| N  | -0.34461300 | -0.13464700 | 0.31730500  |
| H  | 0.38757000  | 0.06248900  | 1.03957200  |
| C  | -0.27781100 | 2.29838800  | -0.00767800 |
| H  | -0.87938100 | 3.17471400  | -0.25801000 |
| H  | 0.22722600  | 2.48220700  | 0.94950400  |
| H  | 0.51348600  | 2.18892800  | -0.76007500 |
| C  | -4.92254500 | 0.53328300  | 0.05529700  |
| H  | -5.62864800 | -0.29877200 | 0.04710400  |
| H  | -5.03379800 | 1.09339300  | 0.99305900  |
| H  | -5.17099400 | 1.22256100  | -0.76287100 |
| N  | -3.36279500 | -1.25763300 | -0.24234000 |
| C  | -3.51150500 | 0.00760500  | -0.09746300 |
| Cl | 2.93049000  | -0.08197100 | -0.05412000 |
| O  | 4.03421700  | -1.05484700 | 0.02290100  |
| O  | 3.39064700  | 1.27663300  | -0.42813600 |
| O  | 1.89730800  | -0.56112400 | -1.09166400 |
| O  | 2.19482100  | -0.01724700 | 1.28576800  |
| H  | 0.33024300  | -0.30159500 | -0.48410100 |

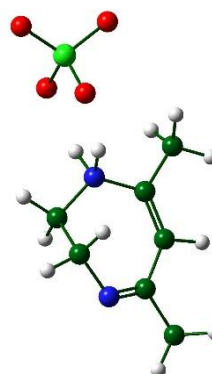

## 2b

0 1

|    |             |             |             |
|----|-------------|-------------|-------------|
| C  | -0.55122800 | 0.49793400  | 0.59918200  |
| C  | 0.53742900  | 1.27919400  | 0.49391600  |
| C  | -2.22044600 | 2.40274200  | 0.15704200  |
| C  | -1.36192200 | 3.02222300  | -0.94542600 |
| H  | -2.05656800 | 2.91322500  | 1.10996000  |
| H  | -1.90286400 | 3.88424000  | -1.34836100 |
| H  | 1.46719500  | 0.76516000  | 0.72915100  |
| H  | -3.28454000 | 2.44941300  | -0.08928800 |
| H  | -1.25165800 | 2.30774400  | -1.77673600 |
| N  | -1.92630000 | 0.94965200  | 0.34778300  |
| H  | -2.56955900 | 0.56708100  | 1.07381400  |
| C  | -0.51583900 | -0.95313900 | 0.98829900  |
| H  | 0.51495400  | -1.29173300 | 1.10431500  |
| H  | -1.05194500 | -1.12114200 | 1.93216400  |
| H  | -1.01406100 | -1.57659100 | 0.23444400  |
| C  | 2.07154900  | 3.26539400  | 0.56555300  |
| H  | 2.14988000  | 4.31131900  | 0.26260700  |
| H  | 2.18954500  | 3.19459800  | 1.65538300  |
| H  | 2.88919900  | 2.68831600  | 0.11678600  |
| N  | -0.06099900 | 3.49280800  | -0.49996400 |
| C  | 0.73202500  | 2.71017200  | 0.13675800  |
| Cl | -4.40025000 | -1.20701100 | -0.16559300 |
| O  | -5.81919800 | -1.08365700 | -0.55102200 |

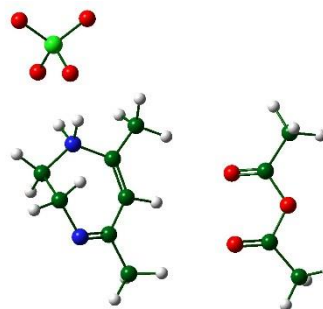

|   |             |             |             |
|---|-------------|-------------|-------------|
| O | -3.97408800 | -2.61966100 | -0.01744800 |
| O | -3.52227900 | -0.53127500 | -1.23564100 |
| O | -4.14500200 | -0.45705000 | 1.13897600  |
| H | -2.33135100 | 0.41374000  | -0.47162300 |
| C | 6.59559100  | 0.11750800  | -0.24838700 |
| H | 6.96487300  | -0.15614200 | 0.74686600  |
| H | 6.75342700  | 1.18284400  | -0.42162900 |
| H | 7.15895000  | -0.47215600 | -0.97894300 |
| C | 5.12865000  | -0.19671500 | -0.34432100 |
| O | 4.93162600  | -1.57825000 | -0.28277100 |
| C | 3.71865300  | -2.13406100 | 0.12189100  |
| C | 3.57501600  | -3.52294200 | -0.43421600 |
| H | 4.47215800  | -4.11315400 | -0.22130900 |
| H | 2.69573200  | -4.00289600 | -0.00255800 |
| H | 3.46983700  | -3.47027100 | -1.52428500 |
| O | 4.23079500  | 0.58665600  | -0.49974100 |
| O | 2.94755800  | -1.56445000 | 0.84862800  |

## 2d

0 1

|   |             |             |             |
|---|-------------|-------------|-------------|
| S | -2.30863800 | -0.16116200 | -0.17150400 |
| O | -1.96309400 | 0.36153100  | 1.33096700  |
| O | -1.42068700 | 0.52797900  | -1.11936900 |
| O | -3.75635500 | -0.07036000 | -0.30775200 |
| C | -1.82367000 | -1.89151400 | -0.09342100 |
| H | -2.06993600 | -2.33424000 | -1.06164600 |
| H | -0.74911400 | -1.94479300 | 0.09310400  |
| H | -2.39650300 | -2.36828500 | 0.70390800  |
| H | -1.00775000 | 0.61630600  | 1.38218100  |
| C | 4.08930400  | -1.17762600 | -0.17066500 |
| H | 4.51983000  | -0.76305100 | -1.08808200 |
| H | 4.20471600  | -2.26216400 | -0.15534600 |
| H | 4.62940100  | -0.73393200 | 0.67386000  |
| C | 2.63222400  | -0.82546000 | -0.07473600 |
| O | 2.46336800  | 0.55577400  | -0.25566900 |
| C | 1.37759700  | 1.23394500  | 0.26456000  |
| C | 1.09987400  | 2.49187900  | -0.49932300 |
| H | 0.42724900  | 2.23291700  | -1.32643400 |
| H | 0.58888100  | 3.20934200  | 0.14557600  |
| H | 2.01784600  | 2.91910600  | -0.90974300 |
| O | 1.71282400  | -1.58135200 | 0.07971700  |
| O | 0.77914600  | 0.83393300  | 1.23813000  |

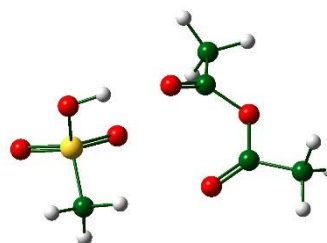

## 2.2. Cartesian coordinates of compounds 39-78 optimized at B3LYP/6-31+G(d) in gas phase

### 39

0 1

|   |             |             |             |
|---|-------------|-------------|-------------|
| C | 1.45929600  | 1.30348300  | 0.03311700  |
| C | 0.08976400  | 1.11054900  | 0.21783400  |
| C | -0.45554600 | -0.18353600 | 0.22070800  |
| C | 0.39995100  | -1.27652800 | 0.03334800  |
| C | 1.77458900  | -1.08714700 | -0.14707300 |
| C | 2.30669100  | 0.20377800  | -0.14821400 |
| H | 1.86852900  | 2.31080900  | 0.03424200  |
| H | -0.56915800 | 1.96467700  | 0.35433000  |
| H | -0.01040700 | -2.28471500 | 0.02950900  |
| H | 2.42515700  | -1.94633000 | -0.29052900 |
| H | 3.37383800  | 0.35482200  | -0.29022500 |
| C | -1.94300900 | -0.38590200 | 0.42273200  |
| H | -2.18471700 | -1.45803300 | 0.37403400  |
| H | -2.25530100 | -0.02192100 | 1.40735700  |
| O | -2.74661200 | 0.35559600  | -0.50140000 |
| H | -2.46546600 | 0.12774100  | -1.40222800 |

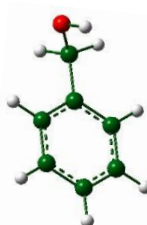

### 41

0 1

|   |             |             |             |
|---|-------------|-------------|-------------|
| C | -1.17217600 | -1.19242400 | -0.00001100 |
| C | 0.22230400  | -1.22457000 | 0.00001100  |
| C | 0.94012400  | -0.02338700 | 0.00001400  |
| C | 0.26357400  | 1.20142500  | -0.00000800 |
| C | -1.13436900 | 1.22034600  | -0.00001300 |
| C | -1.86000600 | 0.02682400  | -0.00001600 |
| H | -1.72522400 | -2.12838200 | -0.00001300 |
| H | 0.76711400  | -2.16401700 | 0.00002900  |
| H | 0.82425600  | 2.13506300  | -0.00002800 |
| H | -1.65305000 | 2.17576900  | -0.00002100 |
| H | -2.94616700 | 0.04486800  | -0.00002500 |
| O | 2.30987500  | -0.11129400 | -0.00000500 |
| H | 2.69736400  | 0.77776600  | 0.00023900  |

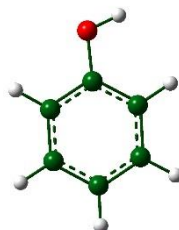

### 43

0 1

|   |             |             |             |
|---|-------------|-------------|-------------|
| C | -0.66436100 | -1.19693800 | -0.00002100 |
| C | 0.72847400  | -1.22076800 | 0.00000700  |
| C | 1.44207400  | -0.01699700 | 0.00001700  |

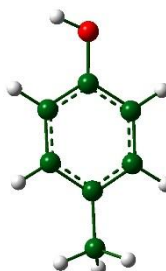

|   |             |             |             |
|---|-------------|-------------|-------------|
| C | 0.75177600  | 1.19679000  | -0.00000600 |
| C | -0.64752600 | 1.20076100  | -0.00002600 |
| C | -1.38323800 | 0.01068000  | -0.00003100 |
| H | -1.20605100 | -2.14107200 | -0.00003500 |
| H | 1.27550900  | -2.15909500 | 0.00001500  |
| H | 1.29839000  | 2.13883300  | -0.00002200 |
| H | -1.16999000 | 2.15516400  | -0.00004500 |
| O | 2.81394800  | -0.09591700 | 0.00001800  |
| H | 3.19376000  | 0.79635600  | 0.00019600  |
| C | -2.89582000 | 0.01518900  | 0.00000800  |
| H | -3.29000600 | 1.03715600  | -0.00059800 |
| H | -3.30075900 | -0.49669200 | -0.88266200 |
| H | -3.30070800 | -0.49561500 | 0.88333000  |

#### 45

|     |             |             |             |
|-----|-------------|-------------|-------------|
| 0 1 |             |             |             |
| C   | -0.01272900 | 1.22319900  | -0.00022300 |
| C   | 1.37544000  | 1.22902500  | -0.00023800 |
| C   | 2.07781600  | 0.01455200  | -0.00002200 |
| C   | 1.38565800  | -1.20577900 | 0.00022100  |
| C   | -0.00522200 | -1.21417300 | 0.00019000  |
| C   | -0.69218000 | 0.00069800  | -0.00003500 |
| H   | -0.57578900 | 2.14886400  | -0.00039700 |
| H   | 1.93215000  | 2.16044000  | -0.00040900 |
| H   | 1.93308200  | -2.14588500 | 0.00041900  |
| H   | -0.55941100 | -2.14518500 | 0.00034200  |
| O   | 3.43698300  | 0.08749400  | 0.00007700  |
| H   | 3.82542800  | -0.80208800 | 0.00044300  |
| N   | -2.15574600 | -0.00666700 | -0.00005200 |
| O   | -2.72818200 | -1.10033400 | 0.00013200  |
| O   | -2.73854300 | 1.08101400  | -0.00013400 |

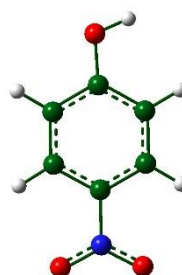

#### 47

|     |             |             |             |
|-----|-------------|-------------|-------------|
| 0 1 |             |             |             |
| C   | -1.10593400 | -1.19556400 | 0.00010700  |
| C   | 0.28774100  | -1.20568500 | 0.00020800  |
| C   | 1.00355000  | 0.00128800  | 0.00012100  |
| C   | 0.29456500  | 1.20775400  | 0.00007800  |
| C   | -1.10324700 | 1.20137600  | 0.00005300  |
| C   | -1.83171000 | 0.00598700  | 0.00004700  |
| H   | -1.63935100 | -2.14437100 | 0.00014500  |
| H   | 0.81922100  | -2.15426400 | 0.00032600  |
| H   | 0.82338200  | 2.15777800  | 0.00004000  |
| H   | -1.63265500 | 2.15205400  | 0.00003500  |
| C   | -3.34359400 | 0.00102300  | -0.00018300 |
| H   | -3.74501900 | 1.01987700  | 0.00147100  |

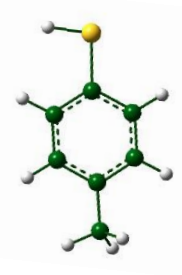

|   |             |             |             |
|---|-------------|-------------|-------------|
| H | -3.74302500 | -0.51272200 | -0.88406900 |
| H | -3.74333100 | -0.51575400 | 0.88178200  |
| S | 2.78992900  | -0.08411500 | -0.00023700 |
| H | 3.01368200  | 1.24617200  | 0.00148900  |

**49**

|     |             |             |             |
|-----|-------------|-------------|-------------|
| 0 1 |             |             |             |
| C   | 1.13951000  | -1.22390600 | -0.00308300 |
| C   | -0.25364300 | -1.21029900 | -0.01422700 |
| C   | -0.96055100 | 0.00170400  | -0.00246400 |
| C   | -0.24427700 | 1.20414700  | -0.00632800 |
| C   | 1.15247700  | 1.20007500  | 0.00035500  |
| C   | 1.84518800  | -0.01535600 | 0.00491800  |
| H   | 1.69175000  | -2.15882500 | -0.00764200 |
| H   | -0.79995700 | -2.14876700 | -0.03320200 |
| H   | -0.77937400 | 2.14911900  | -0.01273400 |
| H   | 1.69811700  | 2.14227400  | 0.00004800  |
| S   | -2.76137700 | 0.01737400  | -0.07431700 |
| O   | 3.21288400  | -0.08831800 | 0.01285300  |
| H   | 3.59358900  | 0.80386900  | 0.01100500  |
| H   | -2.99738700 | -0.09730100 | 1.25375600  |

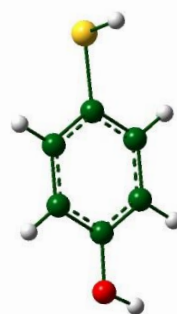

**59**

|     |             |             |             |
|-----|-------------|-------------|-------------|
| 0 1 |             |             |             |
| C   | 1.59642700  | -1.20322400 | -0.00000900 |
| C   | 0.20062800  | -1.21017800 | 0.00001100  |
| C   | -0.50909000 | 0.00015400  | 0.00000900  |
| C   | 0.19585600  | 1.21208400  | -0.00000800 |
| C   | 1.59285400  | 1.20891000  | -0.00001400 |
| C   | 2.30084100  | 0.00438000  | -0.00001900 |
| H   | 2.13352900  | -2.14839000 | -0.00001000 |
| H   | -0.33623600 | -2.15557100 | 0.00003600  |
| H   | -0.33915600 | 2.15848600  | -0.00001900 |
| H   | 2.12644400  | 2.15619100  | -0.00001900 |
| H   | 3.38730800  | 0.00636800  | -0.00002800 |
| S   | -2.29494400 | -0.08353900 | -0.00000400 |
| H   | -2.51787900 | 1.24678000  | 0.00028200  |

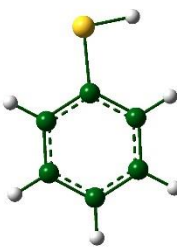

**61**

|     |            |             |             |
|-----|------------|-------------|-------------|
| 0 1 |            |             |             |
| C   | 2.87604600 | -0.57257600 | 0.00005400  |
| C   | 2.22152300 | 0.65509200  | -0.00009800 |
| C   | 0.81637700 | 0.73394300  | -0.00005800 |
| C   | 0.08745800 | -0.46604400 | -0.00002700 |

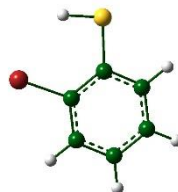

|    |             |             |             |
|----|-------------|-------------|-------------|
| C  | 0.74492200  | -1.69941600 | 0.00017700  |
| C  | 2.13713300  | -1.75930900 | 0.00022500  |
| H  | 3.96220200  | -0.60098700 | 0.00005500  |
| H  | 2.79915800  | 1.57592500  | -0.00022400 |
| H  | 0.15898400  | -2.61315500 | 0.00029600  |
| H  | 2.63488700  | -2.72466000 | 0.00036400  |
| S  | 0.12808300  | 2.37650700  | -0.00028000 |
| H  | -1.16848500 | 2.00889300  | -0.00050700 |
| Br | -1.82105200 | -0.48629300 | 0.00008200  |

### 63

|     |             |             |             |
|-----|-------------|-------------|-------------|
| 0 1 |             |             |             |
| C   | -0.71275400 | -1.21135900 | -0.00000600 |
| C   | 0.68198500  | -1.20815700 | 0.00007100  |
| C   | 1.39387600  | 0.00069300  | 0.00006900  |
| C   | 0.68384700  | 1.20914600  | 0.00000000  |
| C   | -0.71232700 | 1.21237700  | -0.00002600 |
| C   | -1.40324800 | 0.00124400  | -0.00004500 |
| H   | -1.25777100 | -2.14991400 | -0.00000600 |
| H   | 1.21453300  | -2.15568700 | 0.00016400  |
| H   | 1.21163300  | 2.15922200  | -0.00004000 |
| H   | -1.25609600 | 2.15176000  | -0.00005400 |
| S   | 3.17761700  | -0.08178100 | 0.00001600  |
| H   | 3.39913000  | 1.24866000  | 0.00107300  |
| Cl  | -3.16127000 | 0.00181200  | -0.00010400 |

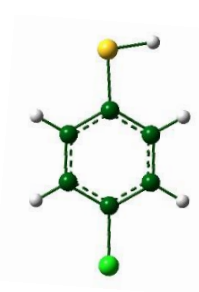

### 65

|     |             |             |             |
|-----|-------------|-------------|-------------|
| 0 1 |             |             |             |
| C   | -0.72034900 | 1.21391100  | -0.00001900 |
| C   | 0.67442800  | 1.22366100  | 0.00001500  |
| C   | 1.38313100  | 0.01658300  | 0.00003300  |
| C   | 0.69414600  | -1.20104900 | 0.00001600  |
| C   | -0.70435400 | -1.21621400 | -0.00001400 |
| C   | -1.38580300 | -0.00737800 | -0.00003300 |
| H   | -1.28874400 | 2.13867400  | -0.00003300 |
| H   | 1.22458300  | 2.15950000  | 0.00003000  |
| H   | 1.24187000  | -2.14155900 | 0.00002400  |
| H   | -1.25633300 | -2.15079200 | -0.00002600 |
| O   | 2.75393100  | 0.09549900  | 0.00005400  |
| H   | 3.13793800  | -0.79488000 | 0.00015900  |
| F   | -2.74866100 | -0.01689100 | -0.00006400 |

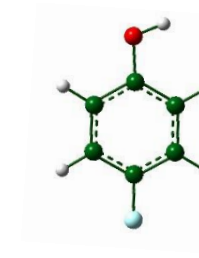

### 67

|     |             |             |             |
|-----|-------------|-------------|-------------|
| 0 1 |             |             |             |
| C   | -0.44893100 | -1.47042900 | 0.00016700  |
| C   | 0.39023700  | -0.35726200 | -0.00002200 |
| C   | -0.12748900 | 0.94679800  | -0.00005600 |
| C   | -1.51763200 | 1.11570900  | 0.00010700  |
| C   | -2.36100100 | 0.00671200  | 0.00029700  |
| C   | -1.83272000 | -1.28907500 | 0.00032700  |
| H   | -0.01464000 | -2.46528200 | 0.00018800  |
| H   | -3.43730200 | 0.15571200  | 0.00042100  |
| H   | -2.48913500 | -2.15419100 | 0.00047500  |
| O   | 0.65206700  | 2.06222000  | -0.00023600 |
| H   | 1.59063100  | 1.80455700  | -0.00034200 |
| Cl  | 2.14293100  | -0.56947600 | -0.00022600 |
| H   | -1.91070200 | 2.12782600  | 0.00008000  |

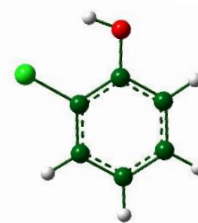

## 69

|     |             |             |             |
|-----|-------------|-------------|-------------|
| 0 1 |             |             |             |
| C   | -0.44188600 | -1.21772000 | -0.00001100 |
| C   | 0.94813500  | -1.21384600 | -0.00000500 |
| C   | 1.65738900  | 0.00097500  | 0.00000600  |
| C   | 0.94899600  | 1.21497100  | 0.00001000  |
| C   | -0.44214200 | 1.21750600  | 0.00000400  |
| C   | -1.12480400 | 0.00036500  | -0.00000700 |
| H   | -0.99901100 | -2.14710800 | -0.00001900 |
| H   | 1.48516400  | -2.15818100 | -0.00000800 |
| H   | 1.48048500  | 2.16226800  | 0.00001800  |
| H   | -0.99941400 | 2.14693200  | 0.00000700  |
| N   | -2.59065300 | 0.00133900  | -0.00001700 |
| O   | -3.16594100 | 1.09273600  | 0.00000000  |
| O   | -3.16721600 | -1.08917700 | -0.00001400 |
| S   | 3.43146900  | -0.08149500 | 0.00001400  |
| H   | 3.65499300  | 1.24864600  | 0.00002100  |

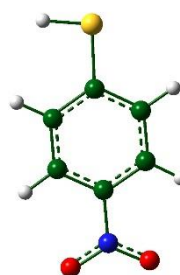

## 71

|     |             |             |             |
|-----|-------------|-------------|-------------|
| 0 1 |             |             |             |
| C   | -0.27533100 | 1.21480300  | -0.00000600 |
| C   | 1.11842700  | 1.22253700  | 0.00001300  |
| C   | 1.82506600  | 0.01481400  | 0.00001900  |
| C   | 1.13149800  | -1.19990200 | 0.00000800  |
| C   | -0.26581500 | -1.20974800 | -0.00000200 |
| C   | -0.96113900 | -0.00206700 | -0.00001400 |
| H   | -0.82651400 | 2.14980800  | -0.00001000 |
| H   | 1.66922400  | 2.15814400  | 0.00002700  |
| H   | 1.67523600  | -2.14288500 | 0.00000500  |
| H   | -0.80517400 | -2.15159300 | -0.00000800 |
| O   | 3.19351100  | 0.08938800  | 0.00002000  |

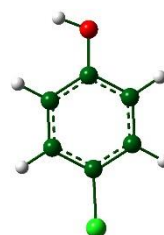



|    |             |             |             |
|----|-------------|-------------|-------------|
| H  | 3.57602600  | -0.80182700 | 0.00022300  |
| Cl | -2.72194900 | -0.00996300 | -0.00003000 |

### 73

|     |             |             |             |
|-----|-------------|-------------|-------------|
| 0 1 |             |             |             |
| C   | 0.37655400  | -1.20577500 | -0.00038100 |
| C   | 1.77338900  | -1.20002400 | -0.00043600 |
| C   | 2.46740600  | 0.01384800  | -0.00043300 |
| C   | 1.76383000  | 1.22275200  | -0.00039500 |
| C   | 0.37050800  | 1.21530300  | -0.00037300 |
| C   | -0.31943600 | 0.00111800  | -0.00054800 |
| H   | -0.16074100 | -2.14868500 | -0.00013800 |
| H   | 2.31562100  | -2.14381300 | -0.00033800 |
| H   | 2.31598600  | 2.15749700  | -0.00027100 |
| H   | -0.17588100 | 2.15300200  | -0.00012100 |
| O   | 3.83605900  | 0.08603800  | -0.00031200 |
| Br  | -2.22266800 | -0.00524100 | 0.00054700  |
| H   | 4.21639400  | -0.80620100 | -0.00039500 |

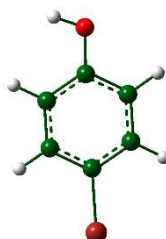

### 75

|     |             |             |             |
|-----|-------------|-------------|-------------|
| 0 1 |             |             |             |
| C   | 1.06640700  | 1.85727400  | 0.00001800  |
| C   | 2.07478200  | 0.89490300  | 0.00008000  |
| C   | 1.74111400  | -0.46702800 | 0.00007900  |
| C   | 0.40266500  | -0.86295800 | 0.00001500  |
| C   | -0.58048800 | 0.12745400  | -0.00004500 |
| C   | -0.28147500 | 1.48743500  | -0.00004500 |
| H   | 1.33228200  | 2.91031400  | 0.00002000  |
| H   | 3.12306300  | 1.17704100  | 0.00013100  |
| H   | -1.07799800 | 2.22069500  | -0.00009200 |
| O   | 2.77372500  | -1.36161200 | 0.00013700  |
| H   | 2.43372700  | -2.27054500 | 0.00016200  |
| H   | 0.11248100  | -1.90820400 | 0.00001000  |
| N   | -1.99365300 | -0.29593900 | -0.00011100 |
| O   | -2.85649900 | 0.58234400  | -0.00009900 |
| O   | -2.23047700 | -1.50575700 | -0.00004700 |

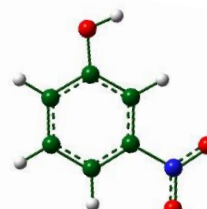

### 77

|     |             |             |             |
|-----|-------------|-------------|-------------|
| 0 1 |             |             |             |
| C   | -2.55784600 | -0.17179600 | 0.00002200  |
| C   | -1.83583600 | 1.01179200  | 0.00004300  |
| C   | -0.42905900 | 0.99587300  | 0.00004200  |
| C   | 0.21873800  | -0.26611400 | -0.00000700 |

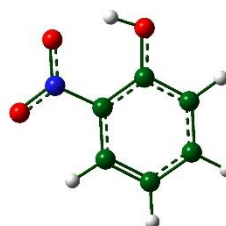

|   |             |             |             |
|---|-------------|-------------|-------------|
| C | -0.52162600 | -1.46144400 | -0.00001700 |
| C | -1.90492600 | -1.41873900 | -0.00000300 |
| H | -3.64382300 | -0.13099600 | 0.00003400  |
| H | -2.32779200 | 1.97930400  | 0.00008500  |
| H | 0.01755500  | -2.40138400 | -0.00005900 |
| H | -2.47744700 | -2.34071700 | -0.00002300 |
| O | 0.20421900  | 2.17728400  | 0.00014800  |
| H | 1.17434200  | 1.99439000  | 0.00031400  |
| N | 1.66362800  | -0.36131200 | -0.00010400 |
| O | 2.19323600  | -1.46862200 | 0.00007900  |
| O | 2.32693300  | 0.70273200  | -0.00024100 |
